# Supplementary material for: RNA Sequencing of the Human Milk Fat Layer Transcriptome Reveals Distinct Gene Expression Profiles at Three Stages of Lactation
Source: PLoS One. 2013 Jul 5;8(7):e67531. doi: 10.1371/journal.pone.0067531 (PMC3702532; doi:10.1371/journal.pone.0067531)
Supplement: Dataset S1 — Gene sets and their FPKM values, identified by lactation stage and processing method. (XLSX) [file pone.0067531.s006.xlsx]

## Sheet: Description
	This Excel Workbook contains gene expression data from Lemay et al (2013) "Transcriptome analysis of human milk production by RNA sequencing reveals distinct gene expression profiles at three stages of lactation"
	Genes are identified by ID and Locus; in cases where GeneIDs exist more than once in the table, the GeneID is appended with "_dup"
	Expression values are given in FPKM as determined using Cufflinks.
	Samples are described in the table below.
	Sample Label	Lactation Stage	Processing Method	Day of Lactation	Na_K
	187-K_RNA_c0_0	Colostrum	Hard spin	1.69	9.62
	187-K_RNA_c2_0	Colostrum	Washed	1.69	9.62
	183-G_RNA_c2_0	Colostrum	Washed	2.15	5.48
	154-D_RNA_c0_0	Transitional	Soft spin	2.03	1.15
	160-J_RNA_c0_2	Transitional	Hard spin	2.33	0.98
	158-1_RNA_c0_0	Transitional	Hard spin	1.85	0.75
	188-L_RNA_c2_0	Transitional	Washed	2.17	0.71
	179-C_RNA_c2_0	Transitional	Washed	1.62	0.7
	179-C_RNA_m2_2	Mature milk	Washed	35	0.57
	179-C_RNA_m0_0	Mature milk	Hard spin	35	0.57
	168-R_RNA_m2_2	Mature milk	Washed	45	0.45
	153-C_RNA_m0_0	Mature milk	Hard spin	41	0.42
	183-G_RNA_m2_2	Mature milk	Washed	24	0.33
	183-G_RNA_m0_0	Mature milk	Hard spin	24	0.33
	359_RNA_m0_0	Mature milk	Soft spin	130	0.31
	174-X_RNA_m2_0	Mature milk	Washed	33	0.3

## Sheet: Expression_Data
GeneID	Locus	153-C_RNA_m0_0	154-D_RNA_c0_0	158-1_RNA_c0_0	160-J_RNA_c0_2	168-R_RNA_m2_2	174-X_RNA_m2_0	179-C_RNA_c2_0	179-C_RNA_m0_0	179-C_RNA_m2_2	183-G_RNA_c2_0	183-G_RNA_m0_0	183-G_RNA_m2_2	187-K_RNA_c0_0	187-K_RNA_c2_0	188-L_RNA_c2_0	359_RNA_m0_0
FAM138A_dup2	chr1:34610-36081	0	0	0	0	0	0	0	0	0	0	0	0	0	0	0	0
OR4F5	chr1:69090-70008	0	0	0	0	0	0	0	0	0	0	0	0	0	0	0	0
OR4F29_dup3	chr1:367658-368597	0	0	0	0	0	0	0	0	0	0	0	0	0	0	0	0
WASH7P	chr1:14361-29370	1.42908	1.16217	1.0082	2.00646	1.23138	1.16769	1.08472	1.37703	0.758524	2.42747	1.02865	0.933743	2.66266	2.09279	0.980493	0.950055
LOC729737	chr1:136697-140566	0.641143	0.124239	0.100698	0.3202	0.126821	0.0908362	0.335067	0.108888	0.0966361	1.48659	0.135586	0.0626102	1.13871	1.55723	0.14436	0.212344
OR4F29_dup2	chr1:621095-622034	0	0	0	0	0	0	0	0	0	0	0	0	0	0	0	0
NCRNA00115	chr1:761585-762902	0	0	0.0677874	0	0	0	0	0	0	0.173049	0	0	0	0.164665	0	0
LOC100288069	chr1:700244-714068	0.609972	0.347665	0.335576	0.479833	0.0723383	0.221544	0.428824	0.189324	0.252687	1.69821	0.527048	0.130961	1.62669	1.39149	0.256351	0.324264
FAM41C	chr1:803450-812182	0	0.0698036	0.158651	0.165437	0.137952	0.200819	0.0544954	0.123418	0	0.0561403	0.129938	0.101952	0.225033	0.0267356	0.0586094	0.0515419
LOC100130417	chr1:852952-854817	0	0	0	0	0	0	0	0	0	0	0	0	0	0	0	0
LOC643837	chr1:763063-789740	0.299077	0.646608	0.828658	0.709382	0.443835	0.691339	0.488697	0.388777	0.842844	0.620325	0.446671	0.973145	1.01376	0.735442	0.455336	0.558672
KLHL17	chr1:895966-901099	0.0315852	0.14627	0.0181022	0.172772	0.0751913	0.0959278	0.0443246	0.103014	0.020142	0.498468	0.0677787	0.0839398	0.438582	0.21722	0.0869265	0
LOC100132287_dup2	chr1:323891-328581	3.94324e-05	3.41028e-05	2.79541e-05	0	2.80086e-05	4.63887e-06	3.39091e-05	2.85814e-05	2.90788e-05	2.817e-05	0	4.09628e-05	0.285704	0.345278	2.37772e-05	4.37116e-05
LOC100133331_dup3	chr1:323891-328581	0.135621	0.0404014	0.0491306	0	0.0145635	0.0738719	0.0586987	0.0556173	0.0543673	0.327078	0	0.0489281	1.3575e-05	3.91997e-05	0.013572	0.0510963
LOC100133331_dup2	chr1:661138-665731	0.276666	0.203008	0.0484718	0.335707	0.0109826	0.129607	0.296473	0.0928575	0.0972193	1.52254	0.0854374	0.0626824	0.746074	1.08889	0.279148	0.153935
HES4	chr1:934341-935552	2.19357	2.0266	0.952943	1.12985	1.66487	2.3259	0.971818	2.49625	1.87278	0.700696	1.61467	1.89773	1.21974	1.03115	1.04228	1.39239
SAMD11	chr1:861120-879961	2.2044e-09	2.84089e-09	0.0209313	4.5093e-11	0.0783571	0.0763927	4.40776e-10	0.0831736	0.0668099	7.9644e-11	0.02409	2.88495e-09	3.05351e-10	5.72995e-09	8.97672e-10	3.35456e-10
NOC2L	chr1:879582-894679	3.00867	3.2146	1.73693	2.92411	2.84613	2.50461	2.10373	2.13699	1.81064	1.72769	2.06081	2.17906	2.54206	1.65214	3.31127	1.72177
PLEKHN1	chr1:901876-910484	0.0310227	0.016053	0.0716131	0	0.10775	0	0.0884671	0.126752	0.13936	0	0.0222615	0.0198499	0.101988	0.104743	0	0.0216328
ISG15	chr1:948846-949919	1.25331	3.38314	1.71379	4.22232	0.911332	0.822318	1.39148	1.70963	1.85826	30.2788	0.991772	0.744382	13.2188	9.05685	0.774352	1.04373
RNF223	chr1:1007125-1009687	0	0	0.0432064	0	0	0	0.0535199	0	0	0	0	0.0977793	0.0611896	0	0	0
LOC254099	chr1:1072396-1079434	0	0	0	0	0	0	0	0	0	0	0	0	0	0	0	0
MIR200B	chr1:1102483-1102578	0	0	0	0	0	0	0	0	0	0	0	0	0	0	0	0
MIR200A	chr1:1103242-1103332	0	0	0	0	0	0	0	0	0	0	0	0	0	0	0	0
MIR429	chr1:1104384-1104467	0	0	0	0	0	0	0	0	0	0	0	0	0	0	0	0
TTLL10	chr1:1109285-1133313	0	0	0	0	0	0	0	0	0	0	0	0	0.025783	0	0	0
TNFRSF18	chr1:1138887-1142089	0	0	0.179341	0	0.0541486	0.0829381	0.0492152	0	0	0.27176	0	0.0556706	0.304891	0.061601	0.0490757	0
TNFRSF4	chr1:1146705-1149548	0	0	0	0	0	0	0	0	0	0.0491382	0	0	0.393742	0.179742	0	0
C1orf170	chr1:910578-917473	0.0446661	0	0	0.061055	0.0178413	0	0	0	0	0.091212	0.0318313	0.0150968	0.0185896	0.0166925	0.0806239	0.0619718
C1orf159	chr1:1017197-1051736	0.364962	0.384379	0.235356	0.237715	0.356549	0.417022	0.1311	0.144574	0.0705029	0.514107	0.288968	0.29609	0.506713	0.386271	0.286277	0.102214
FAM132A	chr1:1177832-1182102	0	0	0	0	0	0	0	0	0	0	0	0	0	0	0	0
B3GALT6	chr1:1167628-1170420	0.479393	0.422632	0.311161	0.426758	0.45192	0.360345	0.250069	0.338307	0.340931	0.635803	0.365226	0.452832	0.870004	0.956431	0.405411	0.500361
SDF4	chr1:1152287-1167447	5.58968	3.49857	3.19052	2.70505	3.89582	3.86558	3.60132	3.84614	3.2822	6.6913	3.96886	4.32964	8.35603	5.59115	2.78636	3.67269
ACAP3	chr1:1227763-1243269	1.83661	1.5178	1.23361	2.07902	1.34223	1.98197	1.81286	1.28686	1.20155	1.3759	1.87505	1.71664	1.00826	0.83167	2.21107	0.99469
SCNN1D	chr1:1210637-1227409	0.022193	0	0	0.124203	0.0176399	0	0.0839296	0	0	0.0812732	0.0157418	0.058674	0	0.0755739	0.015666	0.0153323
GLTPD1	chr1:1260142-1264276	5.52013	4.22895	4.27794	4.42111	4.06549	3.93175	4.2609	4.19481	3.81077	1.76958	4.68038	4.17307	1.5485	0.909115	5.3076	4.22555
TAS1R3	chr1:1266725-1269844	0	0	0.0189921	0	0	0	0.0233784	0	0	0	0	0	0	0	0	0
PUSL1	chr1:1243993-1247057	1.89249	3.05815	1.34419	2.62543	1.68226	3.20063	2.06574	2.00338	1.59292	0.609697	1.94627	1.91416	1.09884	0.259024	3.58711	1.62674
CPSF3L	chr1:1246964-1260046	1.23411	1.99161	1.14941	2.65288	1.95124	1.63219	1.36633	1.50332	1.44668	1.8415	1.13696	1.40687	2.09302	1.52514	1.99247	0.933568
UBE2J2	chr1:1189291-1209234	2.14551	2.03981	1.58498	2.58707	1.8783	2.24588	2.35587	1.98999	1.29079	1.7189	1.39661	1.76104	1.35252	1.45789	2.57684	1.65225
MXRA8	chr1:1288070-1293915	0.138946	0.147993	0.0618415	0.0963092	0	0.106236	0	0.0461156	0.112481	0.0290221	0.152371	0.0957861	0.143842	0.0530653	0.150782	0.0245906
DVL1	chr1:1270657-1284492	3.92026	3.2338	3.43797	3.22233	3.64517	4.54648	2.90467	3.93077	3.19484	1.80254	4.21788	4.15664	1.73869	0.978143	3.77023	3.5365
AURKAIP1	chr1:1309109-1310818	10.4046	11.907	6.67561	14.7917	9.40702	10.1567	7.44835	7.96155	6.23313	6.07447	7.3252	8.52927	7.93814	4.68158	11.2959	7.38706
LOC148413	chr1:1334909-1337426	0.471035	0.301088	0.217903	0.1548	0.19442	0.580506	0.131196	0.185478	0.399296	0.320022	0.470148	0.248358	0.396042	0.261059	0.416247	0.306413
MRPL20	chr1:1337275-1342693	6.4838	9.67605	5.72034	11.0984	9.86389	6.57446	9.51339	6.52657	5.63105	5.14368	7.40644	5.99799	5.6634	4.30856	7.67251	6.31783
TMEM88B	chr1:1361507-1363167	0	0	0	0	0	0	0	0	0	0	0	0	0	0	0	0
AGRN	chr1:955502-991492	1.00981	0.779739	0.907668	0.744125	1.43286	0.834901	1.22012	0.955626	0.731175	3.32811	0.980027	1.04569	1.8153	1.75291	1.03718	0.716746
LOC441869	chr1:1353799-1356650	0.652107	0.167069	0.706322	0.371691	0.796803	1.0186	0.163676	0.941949	0.79464	0.151003	0.740462	0.629482	0.157741	0.154336	0.137228	0.483942
CCNL2	chr1:1321090-1334718	1.08047	1.27681	1.00208	1.31239	0.876394	1.19034	1.70499	0.84876	0.875303	3.23475	0.728629	1.1378	2.91786	3.0147	1.03934	0.551252
ATAD3B	chr1:1407163-1431582	0.544458	1.57225	0.730128	0.835929	0.900452	0.743043	0.813273	0.608033	0.43178	1.10305	0.475878	0.564994	1.28616	0.949485	1.91765	0.370976
C1orf70	chr1:1470157-1475740	0	0	0	0	0	0	0	0	0	0	0	0	0	0	0	0
SSU72	chr1:1477052-1510262	7.10548	11.1565	5.51452	10.4426	5.90575	7.16117	7.78382	5.76721	5.38636	4.4356	6.06303	6.9817	5.60963	4.20974	7.35931	6.50474
ATAD3C	chr1:1385068-1405538	1.24968	1.33842	1.29291	2.05882	1.36038	1.31414	1.52214	1.55517	1.04614	0.288353	1.5934	1.32749	0.301762	0.107928	1.14737	0.945077
LOC643988	chr1:1533387-1535476	0.923217	1.04317	0.467011	1.07742	0.37167	0.589727	0.519044	0.410979	0.313175	1.55482	0.519119	0.862916	1.0733	0.632409	0.738093	0.71722
MMP23B	chr1:1567559-1570030	0	0	0	0	0.112171	0.145587	0.0482595	0.0450185	0	0	0	0.0934716	0	0	0	0.0477864
MMP23A_dup2	chr1:1568158-1570027	0	0	0	0	0	0	0	0	0	0	0	0	0	0	0	0
ATAD3A	chr1:1447522-1470067	1.43663	3.35445	1.55865	3.21322	1.74811	2.10843	1.93279	1.60303	1.06296	1.16957	1.6451	1.31591	1.60814	0.709821	3.26129	1.57371
VWA1	chr1:1370902-1378262	6.90037	2.51939	4.94174	2.76458	6.51271	6.19045	2.17514	5.93862	4.72485	0.661277	6.18894	6.52891	0.546414	0.103102	2.13991	4.95363
SLC35E2	chr1:1656276-1677438	1.2635	0.538849	0.697483	1.23009	0.727802	1.67111	0.486153	0.404753	0.38311	0.962967	0.831094	1.0112	0.776436	0.666474	1.76083	1.11983
GNB1	chr1:1716724-1822526	9.72898	11.9485	9.04203	12.1966	11.2162	12.0546	9.9481	9.8056	8.98831	13.0393	11.1901	11.1199	13.8519	11.9163	10.1741	11.1518
CALML6	chr1:1846265-1848733	0	0	0	0	0	0	0	0	0	0	0	0	0	0.0381106	0	0
TMEM52	chr1:1849028-1850740	0.202464	0.116415	0.0412492	0.0609715	0.0528108	0	0.147932	0.18154	0.0449486	0	0	0	0.0575235	0	0.0510639	0.188246
KIAA1751	chr1:1884751-1935276	0	0	0	0	0	0	0	0	0	0	0	0	0	0	0	0
GABRD	chr1:1950767-1962192	0	0	0	0	0	0	0	0	0	0	0	0	0	0	0	0
NADK	chr1:1682670-1711508	2.09214	4.07325	2.19858	3.42314	2.04799	2.27779	3.05035	2.96678	2.26517	8.90848	2.1212	2.35909	8.69032	8.94977	3.35089	1.89748
PRKCZ	chr1:1981908-2116834	2.4785	3.49971	1.52084	3.4184	2.46577	3.49152	2.58561	2.97831	1.85422	0.839317	2.78539	2.41279	0.733976	0.154346	4.17522	2.32039
C1orf86	chr1:2115898-2139172	5.32962	4.80187	3.68553	5.38769	3.11616	3.3821	2.2952	3.09194	1.40206	4.20016	3.02734	4.9063	6.56895	4.08576	2.86612	2.81435
LOC100128003	chr1:2120481-2125024	0.442629	0.483994	0.274648	0.489722	0.311321	0.299299	0.463181	0.407813	0.261888	0.22434	0.159535	0.195212	0.124307	0.169863	0.60649	0.380495
MORN1	chr1:2252695-2322993	0	0.0889755	0.048052	0.035914	0.0969989	0.0407136	0.0295719	0	0.077574	0.165408	0.0580823	0.110577	0.0683571	0.124033	0.0877557	0.0844128
LOC100129534	chr1:2281852-2284100	0	0.0636346	0.0330238	0	0	0.0268024	0	0	0	0	0	0.0188062	0	0.0204042	0	0.0192984
SKI	chr1:2160133-2241652	1.25948	1.31851	1.51449	1.34284	1.0527	1.71739	1.89181	1.53169	1.39193	1.18348	1.48548	1.38637	0.988807	1.03321	2.4248	1.28942
MIB2	chr1:1550794-1565990	1.7322	1.09537	1.41324	1.94914	1.34107	1.38089	1.47871	1.59157	1.27385	0.925834	1.35496	1.18262	1.14477	0.532401	1.39799	1.12225
PLCH2	chr1:2407753-2436964	0.0138732	0	0	0	0	0	0.00953839	0	0	0.0112276	0	0.00931329	0.0113788	0.0103659	0	0
HES5	chr1:2460183-2461684	0	0	0	0	0	0	0	0	0	0	0	0	0	0	0	0
LOC115110	chr1:2481358-2484284	0	0.0135092	0	0.0215559	0	0.0237068	0.0347805	0.0158874	0	0.213393	0	0.0335137	0.206097	0.180012	0	0
CDK11B	chr1:1571099-1655775	0.370507	0.637499	0.409505	0.873768	0.613989	0.58649	0.492188	0.738657	0.757074	1.56296	0.575461	0.297173	0.878969	1.06255	0.650523	0.493864
CDK11A	chr1:1634169-1655791	0.328903	0.330129	0.150582	0.514355	0.221389	0.516172	0.586572	0.544047	0.502015	0.9869	0.108172	0.272373	0.661801	0.624465	0.297106	0.138182
SLC35E2B	chr1:1592938-1624243	0.821772	1.07151	1.39282	1.50024	1.38164	1.43671	1.39098	1.3098	1.16622	1.49517	1.79874	1.88401	1.29225	1.05453	1.22256	0.78285
MMP23A_dup1	chr1:1631377-1633247	0	0	0.0541345	0	0	0.277228	0	0	0	0	0.131248	0.0631737	0	0	0	0
PANK4	chr1:2439974-2458035	0.653964	0.539982	0.464617	0.819669	0.64834	0.541781	0.563783	0.618624	0.574446	0.717729	0.563561	0.556625	1.07904	0.812409	0.540405	0.429208
RER1	chr1:2323213-2336885	2.40619	2.99533	2.01412	3.11729	2.17667	2.65225	2.75613	2.36807	2.23826	2.842	2.83943	2.95151	3.39287	3.04504	2.24544	2.36312
PEX10	chr1:2336240-2344010	2.06257	1.76812	1.40233	1.57774	1.33601	1.18808	1.35068	0.979841	0.836955	0.90853	1.4915	1.54245	1.34141	0.94726	1.46182	0.847036
TTC34	chr1:2572806-2706230	0	0	0	0	0	0	0	0	0	0	0	0	0	0	0	0
ACTRT2	chr1:2938045-2939467	0	0	0	0	0	0	0	0	0	0	0	0	0	0	0	0
FLJ42875	chr1:2976180-2984289	0	0	0	0	0	0	0	0	0	0	0	0	0	0	0	0
PRDM16	chr1:2985741-3355185	0	0	0.00458061	0	0	0	0	0	0	0	0	0	0.00659461	0	0	0
MIR4251	chr1:3044538-3044599	0	0	0	0	0	0	0	0	0	0	0	0	0	0	0	0
LOC100133445	chr1:2487207-2488450	0.182654	1.63374e-09	0.051877	0.083746	0.182692	0.142642	0	0.0562808	0.0755517	2.51922	0.148581	0.0935488	2.77824	3.52962	0.157717	7.07267e-10
TNFRSF14	chr1:2487804-2495267	1.93586	1.46717	1.33866	2.12621	1.45821	1.4918	0.889325	0.912229	1.11611	11.6795	1.53222	1.67684	12.5651	10.8185	1.37688	0.988203
TPRG1L	chr1:3541555-3546694	3.5587	3.55644	3.85426	5.88435	3.16282	4.63375	3.43953	4.14618	4.58488	3.30554	4.28628	4.35494	3.81958	3.50401	3.17945	4.32392
ARHGEF16	chr1:3371146-3397677	0.571375	0.356521	0.435451	0.628695	0.593699	0.648973	0.261975	0.346867	0.617123	0.0904495	0.312149	0.527287	0.145895	0.0167023	0.396281	0.807368
WRAP73	chr1:3547330-3566671	0.196656	0.569222	0.23707	0.750686	0.495798	0.231661	0.551459	0.495829	0.155433	0.692409	0.596461	0.34903	0.91287	0.473064	0.502244	0.607338
CCDC27	chr1:3668964-3688209	0	0	0	0	0	0	0	0	0	0	0	0	0	0	0	0
LOC388588	chr1:3689351-3692546	1.98399	1.51409	0.703394	1.57897	1.68769	2.12932	1.8891	1.16068	1.90483	0.528624	1.09301	1.16437	0.216225	0	1.33177	1.16173
LRRC47	chr1:3696783-3713068	1.9512	3.20858	1.87237	3.3658	2.45419	3.04219	2.48168	2.51674	1.78934	2.12911	2.20608	2.25038	2.02173	1.44528	3.56443	2.46645
MEGF6	chr1:3404505-3528059	0.00948088	0	0	0	0	0	0	0.00632346	0.00603636	0.43523	0.0069634	0	0.0969975	0.117501	0	0
MIR551A	chr1:3477259-3477354	0	0	0	0	0	0	0	0	0	0	0	0	0	0	0	0
CEP104	chr1:3728644-3773797	0.575245	0.838501	0.578642	0.979592	0.803242	0.71349	0.962852	0.518275	0.571735	0.631207	0.617547	0.5911	0.679919	0.54175	0.949723	0.59527
DFFB	chr1:3773844-3801993	0.0687053	0.204607	0.0845905	0.147646	0.0541945	0.154472	0.051566	0.156185	0.107755	0.258195	0.067111	0.0965169	0.220357	0.259511	0.106526	0.115063
C1orf174	chr1:3805696-3816857	0.500675	0.952936	0.569233	1.1463	0.918242	1.23392	0.764261	0.597927	0.648071	1.66113	0.53672	0.818294	1.64017	1.49582	0.701546	0.7044
LOC284661	chr1:4472110-4484744	0	0	0	0	0	0	0	0	0	0	0	0	0	0	0	0
AJAP1	chr1:4715104-4843851	0	0	0	0	0	0	0	0	0	0.0288852	0	0	0	0	0	0
MIR4417	chr1:5624130-5624203	0	0	0	0	0	0	0	0	0	0	0	0	0	0	0	0
MIR4689	chr1:5922731-5922801	0	0	0	0	0	0	0	0	0	0	0	0	0	0	0	0
LOC100133612	chr1:3816967-3832011	0.0743617	0	0.0225725	0	0.0292431	0	0	0.0248944	0.0242545	0	0.0268863	0	0.0637793	0	0	0
CHD5	chr1:6161846-6240194	0	0.00339834	0	0	0	0	0	0	0	0	0	0	0	0.00475257	0	0
RPL22	chr1:6245079-6259679	16.9579	35.9382	11.1177	36.2186	17.3305	13.2174	27.2241	11.6355	8.82953	10.7818	13.0126	12.8318	15.7476	9.50185	27.8895	12.1055
RNF207	chr1:6266188-6281359	0	0.0195371	0.0103747	0	0.0272107	0.0337529	0.0253037	2.99844e-13	0	0	9.01944e-09	0	1.50724e-13	0.0523964	0.0127203	0
ICMT	chr1:6281252-6296044	1.59006	1.22693	1.75239	1.13311	1.65257	1.76873	1.20635	1.47328	1.31742	1.47187	2.09391	2.01237	1.25301	1.1179	1.38198	1.86462
HES3	chr1:6304251-6305638	0	0	0	0	0	0	0	0	0	0	0	0	0	0	0	0
GPR153	chr1:6307405-6321035	0	0	0	0	0	0	0.0149268	0	0	0.382372	0	0	0.257296	0.223111	0	0
C1orf93	chr1:2517898-2522908	0.687777	1.00346	0.684828	0.904443	1.28859	0.751306	0.732352	0.866022	0.707723	3.19102	1.18376	1.08776	5.54167	3.60802	0.574271	0.458942
MMEL1	chr1:2522080-2564481	0.02975	0.0147407	0.0441352	0	0	6.24456e-278	0	0	0.019231	0	0.0187941	5.28081e-227	0	0	0.0829022	0.0322342
HES2	chr1:6475293-6479979	0	0.00872121	0	0.0687534	0	0	0.0111971	0	0	0.343301	0	0	0.755154	0.686161	0.0342531	0
ACOT7	chr1:6324331-6453826	0.292661	0.418654	0.171783	0.0420579	0.236969	0.217888	0.26806	0.22488	0.213408	1.84725	0.152176	0.202524	1.62774	0.876988	0.302655	0.177376
ESPN	chr1:6484847-6521004	0.1997	0.199354	0.0381342	0.267922	0.356604	0.389093	0.247347	0.10072	0.0711476	0.0555737	0.15796	0.147985	0	0.0168499	0.364916	0.198793
MIR4252	chr1:6489893-6489956	0	0	0	0	0	0	0	0	0	0	0	0	0	0	0	0
NOL9	chr1:6581406-6614658	0.184526	0.326304	0.0838083	0.199255	0.230246	0.190532	0.218614	0.212155	0.197902	0.273328	0.104878	0.152699	0.33003	0.297581	0.418171	0.103303
TAS1R1	chr1:6615337-6639817	0.161053	0.112845	0.0157122	0.267172	0	0	0.0261819	0.108386	0.023311	0.0283033	0.0256578	0.0246112	0	0	0.0195932	0.100413
ZBTB48	chr1:6640062-6649340	0.157877	0.266257	0.0465409	0.399069	0.202293	0.361107	0.265486	0.382207	0.167307	0.754959	0.352101	0.305217	0.647989	0.838825	0.269684	0.365951
NPHP4	chr1:5922869-6052533	0.131218	0.159044	0.051928	0.148494	0.0207757	0.11918	0.109389	0.0419522	0.0681719	0.302646	0.0802325	0.0511448	0.1661	0.27047	0.0909636	0.054805
KCNAB2	chr1:6052357-6161253	0.0421368	0.443164	0.0386214	0.524236	0	0.0189579	0.103048	0.0307162	0.0140472	9.10283	0.117758	0.0448618	11.5618	9.92974	0.129479	0
PHF13	chr1:6673755-6684093	0.392478	0.219374	0.312066	0.145107	0.185074	0.488168	0.189726	0.159739	0.410681	0.345468	0.342639	0.26043	0.550557	0.368153	0.197443	0.365343
KLHL21	chr1:6650783-6662929	1.33565	0.716824	1.23054	0.712537	1.34576	2.00358	1.01727	1.1707	1.1645	1.25777	1.16703	1.55171	1.1885	0.81758	1.02461	1.65475
TNFRSF25	chr1:6521213-6526255	0	0	0	0	0	0.108779	0	0	0	0	0	0	0.0619805	0.129983	0	0
PLEKHG5	chr1:6526151-6580069	0.0145508	0.0345534	0.0084373	0.013223	0.0459629	0.0298388	0	0	0.0372947	0	0.041447	0.00993104	0	0.021719	0	0.0100582
VAMP3	chr1:7831328-7841492	1.37867	2.08976	1.35235	1.92953	1.72845	1.71196	2.37135	1.30741	1.06817	4.03917	1.61564	1.64213	3.49457	3.04875	2.00967	1.16354
THAP3	chr1:6684924-6695646	0.457719	0.484358	0.223782	0.223939	0.327474	0.405267	0.282973	0.456123	0.288435	0.476062	0.583348	0.404669	0.523528	0.356841	0.253864	0.337329
DNAJC11	chr1:6694227-6761966	1.24756	1.49523	0.873515	1.48092	1.05567	1.42701	1.2942	0.884093	0.732891	1.43153	0.898947	1.06299	1.25143	0.738038	1.57581	1.05153
UTS2	chr1:7907671-7913551	0	0	0	0	0	0	0	0	0	0.14564	0	0	0	0	0	0
TNFRSF9	chr1:7975930-8003225	0	0.0229504	0	0.0105486	0.00879764	0	0	0	0	0.646468	0	0.00810946	0.877216	0.892216	0.00957741	0
PARK7	chr1:8021713-8045342	17.2178	29.5496	14.3561	28.0142	16.8031	18.1491	21.5446	15.2652	14.3404	11.2022	16.4826	14.3971	15.3051	8.18277	20.0909	12.7522
ERRFI1	chr1:8071778-8086393	1.08253	0.227322	0.347191	0.594542	0.293319	0.789481	0.726538	0.447041	0.422637	0.484765	0.532809	0.590118	0.385221	0.299343	0.217376	0.788134
SLC45A1	chr1:8384389-8404227	0	0	0	0	0	0	0	0	0	0	0	0	0	0	0	0
PER3	chr1:7844762-7905237	0.430861	0.135019	0.185365	0.0794356	0.251641	0.309754	0.25214	0.154398	0.125626	0.637707	0.339557	0.281488	0.477682	0.443412	0.177351	0.151918
ENO1	chr1:8921058-8939151	45.7627	86.2125	35.7287	102.962	81.5706	59.7243	53.6769	57.9405	51.3364	52.0851	48.8222	52.0746	64.9684	38.2544	72.3705	36.3786
ENO1-AS1	chr1:8938893-8939943	0	0	0	0	0	0	3.72013e-180	0.106168	0	0	0	1.55657e-161	0	0	4.91302e-200	0
TP73	chr1:3569128-3652765	0	0.00858057	0	0	0	0	0	0	0.010588	0.012469	0	0	0	0	0.0114383	0
TP73-AS1	chr1:3652547-3663937	0.311104	0.242184	0.133071	0.330835	0.209478	0.273621	0.221132	0.172494	0.178439	0.451705	0.291438	0.167041	0.400448	0.369989	0.164459	0.198014
SLC2A7	chr1:9063358-9086404	0	0	0	0	0	0	0	0	0	0	0	0	0	0	0	0
SLC2A5	chr1:9097004-9148510	0	0.133334	0	0.114458	0.0973243	0	0.0232667	0	0	2.98828	0	0	0.43785	0.446661	0.0237213	0
GPR157	chr1:9164475-9189229	0.314369	0.380176	0.27982	0.141993	0.123871	0.704536	0.227395	0.155485	0	0.259857	0.111509	0.317039	0.511389	0.237151	0.454638	0.546102
CA6	chr1:9005921-9035148	23.4437	38.6889	46.019	31.5721	38.6308	54.4202	42.2226	53.2058	55.5809	6.34084	41.7276	46.2243	2.88098	0.416783	24.2794	23.6273
MIR34A	chr1:9211726-9211836	0	0	0	0	0	0	0	0	0	0	0	0	0	0	0	0
SPSB1	chr1:9352940-9429590	0.588287	0.730313	0.398273	0.996798	0.172213	0.404369	0.971592	0.561822	0.595989	1.22205	0.732027	0.635173	1.48495	1.7518	0.763208	0.742856
SLC25A33	chr1:9599527-9642831	1.30278	1.80393	0.88537	1.44788	0.793245	1.06561	1.22315	0.996365	0.779144	0.527618	0.724894	0.873304	0.679191	0.435784	0.952485	0.774775
CAMTA1	chr1:6845383-7829766	6.14607	5.07956	3.68743	7.53243	6.00007	5.38885	5.77751	4.93724	3.63992	2.31324	4.08132	4.03012	1.86201	2.33463	5.04655	2.76843
TMEM201	chr1:9648931-9674935	0.520445	0.34623	0.406468	0.399231	0.293722	0.55544	0.513072	0.300534	0.289282	0.455005	0.364702	0.545335	0.312038	0.331838	0.380914	0.299249
CTNNBIP1	chr1:9908333-9970316	2.0166	1.9242	1.868	1.30529	1.84269	1.72612	1.40518	1.64075	1.41258	0.611191	1.91952	1.91553	0.730847	0.588026	1.77874	1.35446
LZIC	chr1:9989775-10002826	0.825247	0.887633	0.673387	0.843339	1.08914	1.24942	1.14729	0.718274	1.2597	0.767551	0.792269	0.804353	0.848253	0.902021	1.1826	0.882511
H6PD	chr1:9294862-9331394	0.0297171	0.2079	0.0580684	0.265038	0.0410864	0.0653149	0.147026	0.0697906	0.0533323	1.78875	0.112576	0.0358475	2.0703	1.65269	0.117251	0.052441
RBP7	chr1:10057254-10076078	0.233725	0.491529	0	0.420168	0.238719	0.0710146	0.285759	0.0514495	0.0545332	0.247157	0.166422	0	0.140647	0.0565079	0.186773	0
PIK3CD	chr1:9711789-9789172	0	0.112113	0.00748885	0.151498	0.00986028	0.0500819	0.0911407	0.0675417	0.00825516	2.00348	0.0633642	0.0260792	1.95773	1.99739	0.0277513	0.0266608
CLSTN1	chr1:9789078-9884550	8.67796	4.48244	5.62371	4.32491	6.04031	5.32544	5.51398	5.52399	5.42212	2.58413	8.33194	9.16529	2.21168	1.76056	5.81434	3.3775
C1orf200	chr1:9712667-9714644	0	0	0	0	0	0	0	0	0	0.0271573	0	0	0.0300568	0	0	0
NMNAT1	chr1:10003485-10045556	0.419303	1.33589	0.418713	1.29124	0.456941	0.475491	1.025	0.478109	0.497726	0.422699	0.432899	0.442065	0.504616	0.564324	1.03494	0.466037
PGD	chr1:10459084-10480201	12.0526	12.4785	9.55827	13.9399	11.419	12.2568	11.5603	11.5533	8.2921	13.4015	11.6843	12.6628	20.5659	17.0952	12.8523	10.8253
APITD1	chr1:10490158-10502872	0.295407	0.648719	0.45404	0.397988	0.477471	0.651265	0.72026	0.336404	0.666209	0.144683	0.628366	0.42005	0.277888	0.21153	0.661777	0.418951
APITD1-CORT	chr1:10490158-10512060	0.142502	1.1525e-10	0.0584218	0.0811571	1.94079e-244	0.138622	0.18436	3.38769e-12	2.82283e-13	0	3.72489e-40	1.85537e-84	9.78386e-43	1.33444e-46	6.47285e-08	3.49341e-08
CORT	chr1:10509775-10512060	7.61043e-63	0	2.42141e-50	1.36214e-56	0	1.26383e-23	1.10569e-21	0.0387071	0	0	0	0	0	0	0	0
DFFA	chr1:10520602-10532613	1.07893	1.99198	1.16366	2.51806	1.52995	0.941323	1.67784	1.01245	0.847089	1.06417	1.47262	1.05865	1.10037	0.695813	2.44218	0.985527
PEX14	chr1:10535002-10690815	1.18116	1.23174	0.782987	1.72599	1.07283	1.20796	1.16992	0.930747	0.787288	3.46564	1.3112	1.04144	2.05699	2.24586	2.32498	1.13011
UBE4B	chr1:10093040-10241296	0.883992	1.33702	0.582014	1.53606	1.10147	0.960285	1.24788	0.754843	0.66428	0.801662	1.0555	0.935135	1.03473	0.926274	1.68702	0.585851
C1orf127	chr1:11006529-11042094	0.0226056	0.0127679	0	0.0205458	0	0	0.0329249	0	0	0.182803	0.0161766	0	0.115903	0.118759	0	0
TARDBP	chr1:11072678-11085549	1.01755	1.99107	1.29211	1.96938	1.36533	1.85324	1.88896	1.37844	1.10611	2.24428	1.23147	1.41013	1.80509	1.70712	2.13566	1.56244
MASP2	chr1:11086579-11107296	0	0	0	0	0	0	0	0	0	0.0631018	0	0	0.0234822	0.0200475	0	0
SRM	chr1:11114648-11120091	3.10936	10.5987	3.07	9.19913	4.72233	2.7451	7.89234	3.60369	3.56111	2.88237	3.07674	3.8732	5.57903	2.80784	9.74895	2.38364
EXOSC10	chr1:11126675-11159938	1.05239	1.74383	0.92669	1.63663	1.02508	1.29064	1.36084	1.12748	1.08461	2.05659	0.815716	1.00863	1.64697	1.53031	1.69521	1.18246
RERE	chr1:8412463-8877699	3.5509	4.36199	3.09355	4.05455	3.31443	4.453	5.55315	3.6578	3.3686	1.40481	3.62433	3.39907	1.18521	1.16896	6.59494	3.47285
UBIAD1	chr1:11333254-11348491	0.396293	0.485927	0.372444	0.228383	0.439834	0.4115	0.306793	0.286348	0.433439	0.484592	0.479037	0.347793	0.511751	0.600751	0.336383	0.411509
PTCHD2	chr1:11539294-11597640	0	0	0	0	0	0	0	0	0	0	0	0	0	0	0	0
CASZ1	chr1:10696665-10856707	0.896706	0.574417	0.492219	0.908378	0.428786	1.43145	0.548268	0.593744	0.509584	0.231703	0.678114	0.703187	0.301765	0.14933	1.01835	0.648922
FBXO6	chr1:11724149-11734409	0.68228	1.06467	0.722441	0.919355	1.07918	1.12653	0.69358	0.875528	0.843039	2.11758	0.863229	0.752764	2.2298	1.95828	0.41504	0.952087
MAD2L2	chr1:11734536-11751678	0.623558	0.886166	0.520464	0.959596	0.880696	0.704939	0.745666	0.604305	0.669129	1.75104	0.648792	0.669745	1.83874	1.74296	0.594501	0.718466
C1orf187	chr1:11751780-11780336	0	0	0	0	0	0	0	0	0	0.0283218	0	0	0.0293345	0.0261138	0	0
FBXO2	chr1:11708417-11714888	0.290115	0.217274	0.0558865	0.0463312	0.0416595	0.200734	0.312513	0.124893	0.278235	0	0.417571	0.334951	0.0782315	0	0.102158	0.312997
FBXO44	chr1:11714431-11723384	0.352352	0.262346	0.279907	0.23539	0.17672	0.321627	0.259927	0.321025	0.214608	0.555408	0.271985	0.301144	0.401745	0.56002	0.264705	0.0895038
MTOR	chr1:11166587-11322608	0.713315	1.33382	0.865513	1.25641	1.16798	1.09601	2.06899	1.8472	1.89763	0.745333	0.778757	0.990229	0.848154	0.827958	2.35766	0.925069
ANGPTL7	chr1:11249397-11256038	0.0506506	0	0	0	0	0	0	0	0.016709	0	0.0181833	0	0	0	0.0385948	0
AGTRAP	chr1:11796141-11810828	3.05694	1.67349	3.84867	2.23569	3.11105	2.82041	2.52689	3.84956	3.58529	6.59564	3.33174	3.78985	8.54397	7.654	1.43707	3.28562
NPPB	chr1:11917520-11918992	0	0	0	0	0	0	0	0	0	0	0	0	0	0	0	0
KIAA2013	chr1:11979644-11986485	6.26108	2.79504	5.37839	2.88296	4.9725	5.52815	2.82035	5.37539	3.8958	5.35543	5.46077	5.42859	5.25139	4.27251	3.09315	5.88698
PLOD1	chr1:11994723-12035599	4.14021	3.60413	3.15141	3.50557	3.2582	3.26607	4.19998	3.19564	3.10235	6.68766	4.17719	3.78302	4.45044	3.20055	3.39333	3.05478
KIF1B	chr1:10270763-10441661	0.608321	1.00848	0.587287	0.852115	0.727501	0.939305	1.06608	0.866517	0.85109	1.34344	0.733469	0.67542	1.31354	1.25751	1.26399	0.676913
MIIP	chr1:12079511-12092106	3.09775	4.98747	4.29531	8.51525	4.61346	5.06599	6.8991	6.58694	5.37466	3.16628	3.69892	3.98365	2.98932	1.93807	5.43801	4.63235
TNFRSF8	chr1:12123433-12204264	0	0	0	0	0	0	0	0	0	0.100234	0	0	0.14525	0.0824606	0	0
MTHFR	chr1:11845786-11866160	0.848612	1.12856	0.628456	0.854363	0.709207	1.16944	1.18995	0.933269	1.0171	1.17778	0.913542	0.951677	1.26357	1.10511	1.55827	0.865074
TNFRSF1B	chr1:12227059-12269277	0.287083	0.67391	0.0909679	0.863997	0.120329	0.15069	0.48983	0.362017	0.406604	11.8837	0.329148	0.0809203	16.0884	12.0497	0.201408	0.261505
MIR4632	chr1:12251761-12251839	0	0	0	0	0	0	0	0	0	0	0	0	0	0	0	0
DHRS3	chr1:12627938-12677820	1.0346	1.07708	0.590201	2.91754	1.3814	1.34828	1.8122	1.29914	1.18268	6.96412	0.97577	1.25341	4.6008	4.21428	1.12107	1.3065
AADACL4	chr1:12704565-12727097	0	0	0	0	0	0	0	0	0	0	0	0	0	0	0	0
AADACL3	chr1:12776117-12788726	0	0	0	0	0	0	0	0	0	0	0	0	0	0	0	0
C1orf158	chr1:12806162-12821102	0	0	0	0	0	0	0	0	0	0	0	0	0	0	0	0
PRAMEF12	chr1:12834983-12838048	0	0	0	0	0	0	0	0	0	0	0	0	0	0	0	0
PRAMEF1	chr1:12851545-12856777	0	0	0	0	0	0	0	0	0	0	0	0	0	0	0	0
PRAMEF11	chr1:12884467-12891264	0	0	0	0	0	0	0	0	0	0	0	0	0	0	0	0
LOC649330	chr1:12907235-12908237	0	0	0	0	0	0	0	0	0	0	0	0	0	0	0	0
HNRNPCL1	chr1:12907260-12908578	0	0	0	0	0	0	0	0	0	0	0	0	0	0	0	0
PRAMEF2	chr1:12916940-12921764	0	0	0	0	0	0	0	0	0	0	0	0	0	0	0	0
PRAMEF4	chr1:12939032-12946025	0	0	0	0	0	0	0	0	0	0	0	0	0	0	0	0
PRAMEF10	chr1:12952726-12958094	0	0	0	0	0	0	0	0	0	0	0	0	0	0	0	0
PRAMEF8_dup3	chr1:12976449-12980568	0	0	0	0	0	0	0	0	0	0	0	0	0	0	0	0
PRAMEF7_dup2	chr1:12977512-12980233	0	0	0	0	0	0	0	0	0	0	0	0	0	0	0	0
PRAMEF6_dup2	chr1:12998301-13007406	0	0	0	0	0	0	0	0	0	0	0	0	0	0	0	0
PRAMEF22_dup2	chr1:13035542-13038381	0	0	0	0	0	0	0	0	0	0	0	0	0	0	0	0
PRAMEF5_dup2	chr1:13108513-13117751	0	0	0	0	0	0	0	0	0	0	0	0	0	0	0	0
LOC440563	chr1:13182959-13184326	0	0	0	0	0	0	0	0	0	0	0	0	0	0	0	0
PRAMEF3	chr1:13328195-13331692	0	0	0	0	0	0	0	0	0	0	0	0	0	0	0	0
PRAMEF22_dup1	chr1:13328832-13331671	0	0	0	0	0	0	0	0	0	0	0	0	0	0	0	0
PRAMEF5_dup1	chr1:13359818-13369057	0	0	0	0	0	0	0	0	0	0	0	0	0	0	0	0
PRAMEF6_dup1	chr1:13359832-13368936	0	0	0	0	0	0	0	0	0	0	0	0	0	0	0	0
PRAMEF8_dup2	chr1:13386646-13390765	0	0	0	0	0	0	0	0	0	0	0	0	0	0	0	0
PRAMEF15_dup2	chr1:13421175-13428190	0	0	0	0	0	0	0	0	0	0	0	0	0	0	0	0
PRAMEF9_dup2	chr1:13421175-13428191	0	0	0	0	0	0	0	0	0	0	0	0	0	0	0	0
PRAMEF13	chr1:13447413-13452656	0	0	0	0	0	0	0	0	0	0	0	0	0	0	0	0
PRAMEF14_dup2	chr1:13447413-13452656	0	0	0	0	0	0	0	0	0	0	0	0	0	0	0	0
PRAMEF18	chr1:13474052-13477569	0	0	0	0	0	0	0	0	0	0	0	0	0	0	0	0
PRAMEF16	chr1:13495253-13498259	0	0	0	0	0	0	0	0	0	0	0	0	0	0	0	0
PRAMEF20_dup2	chr1:13516065-13526943	0	0	0	0	0	0	0	0	0	0	0	0	0	0	0	0
PRAMEF21_dup2	chr1:13521962-13526943	0	0	0	0	0	0	0	0	0	0	0	0	0	0	0	0
PRAMEF8_dup1	chr1:13607430-13611550	0	0	0	0	0	0	0	0	0	0	0	0	0	0	0	0
PRAMEF7_dup1	chr1:13607766-13610487	0	0	0	0	0	0	0	0	0	0	0	0	0	0	0	0
PRAMEF15_dup1	chr1:13641972-13648987	0	0	0	0	0	0	0	0	0	0	0	0	0	0	0	0
PRAMEF9_dup1	chr1:13641972-13648988	0	0	0	0	0	0	0	0	0	0	0	0	0	0	0	0
PRAMEF14_dup1	chr1:13668268-13673511	0	0	0	0	0	0	0	0	0	0	0	0	0	0	0	0
PRAMEF19	chr1:13694888-13698405	0	0	0	0	0	0	0	0	0	0	0	0	0	0	0	0
PRAMEF17	chr1:13716087-13719064	0	0	0	0	0	0	0	0	0	0	0	0	0	0	0	0
PRAMEF20_dup1	chr1:13736906-13747803	0	0	0	0	0	0	0	0	0	0	0	0	0	0	0	0
PRAMEF21_dup1	chr1:13742801-13747803	0	0	0	0	0	0	0	0	0	0	0	0	0	0	0	0
LRRC38	chr1:13801444-13840242	0	0	0	0	0	0	0	0	0	0	0	0	0	0	0	0
CLCN6	chr1:11866206-11903201	0.32682	0.122902	0.0987708	0.358821	0.0665802	0.115597	0.0655985	0.186879	0.269595	0.603318	0.285459	0.241679	0.89806	0.805522	0.191894	0.125801
NPPA-AS1	chr1:11900375-11907673	0	0.0483275	0.0652826	9.64727e-07	8.18739e-08	1.60052e-08	0.162835	0	0	1.46447e-54	9.95708e-09	2.14664e-12	0.131175	0.160364	4.70314e-07	0
NPPA	chr1:11905766-11907840	0	0	0.058186	0	0	0	0	0	0	0	0	0	0	0.0561204	0	0
MFN2	chr1:12040237-12073572	1.37111	1.97985	1.5169	2.15297	1.63137	1.65071	2.07658	2.02418	1.71232	1.97209	1.68043	1.81472	2.51607	2.04334	2.58805	1.38407
PDPN	chr1:13910251-13944452	0.0254991	0	0	0	0	0	0	0	0	0.189752	0	0	0.196114	0.232849	0	0
TMEM51	chr1:15479027-15546974	0.206669	0.135639	0.0199	0.120922	0.102509	0.454565	0.0969448	0.117191	0.230688	5.19038	0.140395	0.142977	4.07138	4.08609	0.100234	0.204865
FHAD1	chr1:15573767-15724622	0	0.0112643	0	0	0	0	0	0	0	0.11777	0	0	0.0334065	0.0690363	0.00720888	0
EFHD2	chr1:15736390-15756839	0.885732	1.05812	0.406944	1.42103	1.00135	0.73665	0.648951	0.42019	0.372969	12.2983	0.45407	0.442253	16.0897	12.7203	0.513726	0.557965
CTRC	chr1:15764937-15773153	0	0	0	0	0	0	0	0	0	0	0	0	0	0	0	0
CELA2A	chr1:15783222-15798586	0	0	0	0	0	0	0	0	0	0	0	0	0	0	0	0
CELA2B	chr1:15802595-15817895	0	0.0441303	0	0	0	0	0	0	0	0	0	0	0	0	0	0
CASP9	chr1:15818768-15851285	1.19118	1.11327	1.14474	2.04999	1.35713	1.79412	1.43573	1.78745	1.77434	1.38483	1.34279	1.53721	1.21334	0.714007	1.85994	1.24479
DNAJC16	chr1:15853351-15898228	0.434061	0.367495	0.273352	0.443563	0.304199	0.406215	0.327642	0.267325	0.378419	0.474127	0.332545	0.424399	0.411201	0.404454	0.494908	0.384982
AGMAT	chr1:15899151-15911605	0	0.0581751	0	0	0	0.0297067	0	0	0	0.0251826	0.0232631	0.0446843	0.139018	0.0237363	0.0749938	0
DDI2	chr1:15943952-15987552	0.192933	0.60645	0.235972	0.30633	0.086237	0.307822	0.400401	0.271261	0.188172	0.699591	0.336028	0.287317	0.92269	0.751725	0.421001	0.261494
RSC1A1	chr1:15986363-15988217	0.260185	0.408586	0.262906	0.25665	0.294657	0.404528	0.211425	0.246548	0.141959	0.526808	0.312931	0.202907	0.819081	0.729542	0.352295	0.394683
PLEKHM2	chr1:16010826-16061264	1.39645	1.319	1.50235	1.1115	1.30255	1.39604	1.25052	1.25277	1.19503	6.88165	1.23042	1.26085	8.09727	6.24247	1.92598	1.11924
SLC25A34	chr1:16062808-16067884	0.0713982	0.0271919	0.0866969	0.0871274	0.0384076	0.117739	0.388898	0	0	0.467595	0.0521811	0.0326661	0.369776	0.525116	0.0896744	0.0169832
TMEM82	chr1:16068916-16074477	0	0	0	0	0	0	0	0	0	0	0	0	0	0	0	0
KAZN	chr1:14925212-15444544	0.929498	1.40301	1.43416	1.46523	1.34326	1.95415	1.45384	1.3373	1.23566	0.260185	1.52054	1.63596	0.373661	0.0162816	1.7015	1.3762
C1orf126	chr1:15438310-15478960	0.0273606	0.0110138	4.775e-22	0.0143299	0	0	1.28114e-318	0	0	0.0953282	0	6.4233e-319	0.0571388	0.0668118	1.94118e-318	0.0255353
UQCRHL	chr1:16133656-16134194	18.1216	63.0388	22.1311	56.899	23.879	23.1249	40.2492	20.6772	22.976	15.2007	15.4778	15.4956	23.4039	12.0032	32.7253	16.7754
FBLIM1	chr1:16085254-16113084	2.20744	1.74278	1.76326	2.07473	1.46079	1.85524	1.93983	1.81808	1.33662	0.590313	1.86881	2.22026	0.534108	0.373718	2.12144	1.47869
ZBTB17	chr1:16268363-16302627	0.482286	0.47336	0.268495	0.761492	0.488006	0.303038	0.373786	0.433795	0.290497	0.712124	0.440689	0.411779	0.998343	0.77577	0.644931	0.237197
C1orf64	chr1:16330730-16333184	0	0	0	0	0	0	0	0	0	0	0	0	0	0	0	0
HSPB7	chr1:16340522-16345285	0.0451345	0.0517208	0	0	0	0.0224254	0.0166746	0	0	0.109702	0.016277	0	0	0	0.0169591	0
CLCNKA	chr1:16348485-16360545	0	0.0162802	0	0.103299	0	0	0	0	0	0	0	0	0	0	0	0
CLCNKB	chr1:16370246-16383803	0.0320163	0	0	0.029443	0	0	0	0	0	0	0	0	0	0	0.0241685	0
FAM131C	chr1:16384263-16400127	0	0	0	0	0	0	0	0	0	0	0.0277531	0	0.0321583	0	0	0
EPHA2	chr1:16450831-16482582	0.173469	0.214563	0.202911	0.188783	0.135856	0.503686	0.283886	0.284749	0.1771	0.141879	0.148515	0.153272	0.130569	0.0524423	0.171602	0.179693
ARHGEF19	chr1:16524598-16539104	0.339625	0.430765	0.398468	0.755534	0.360926	0.229013	0.31001	0.403793	0.243804	0.186332	0.468798	0.295694	0.190032	0.068182	0.422923	0.410574
RSG1	chr1:16558181-16563659	0.290588	0.465213	0.435383	0.511163	0.349259	1.00523	0.398715	0.354224	0.615464	0.118535	0.520252	0.5849	0.206788	0.148123	0.250583	0.504569
FBXO42	chr1:16576558-16678948	0.36369	0.455524	0.241278	0.53497	0.168866	0.403086	0.323676	0.367831	0.319224	0.89326	0.313855	0.425609	0.826753	0.631406	0.665308	0.338875
PRDM2	chr1:14026734-14151574	0.331087	0.222644	0.319774	0.561961	0.277317	0.237303	0.372226	0.31812	0.214238	0.904325	0.308808	0.472866	0.731787	0.658472	0.233208	0.420168
SPATA21	chr1:16725137-16763919	0	0	0	0	0	0	0	0	0	0	0	0	0	0	0	0
C1orf144	chr1:16693582-16724640	2.49379	3.89907	2.92226	3.63786	3.12814	2.85661	2.98873	2.28478	2.05095	3.82873	2.909	2.33116	4.40499	3.189	3.2079	1.98269
CROCCP3	chr1:16793930-16819196	0	0.00712471	8.27649e-05	0	0.0188896	0	0.0177913	0.00811473	0	0.057477	0	0	0.0105335	0.0270928	0	0
MIR3675_dup3	chr1:16875408-16875482	0	0	0	0	0	0	0	0	0	0	0	0	0	0	0	0
NECAP2	chr1:16767166-16786584	1.4007	1.28164	1.19126	2.53716	1.27919	2.10914	1.32405	1.43716	1.60442	5.15452	1.25156	1.35028	6.6295	6.09892	1.76162	1.41831
NBPF1	chr1:16890411-16939982	0.4764	0.543868	0.872838	0.582013	0.414801	1.39527	0.698723	0.840979	0.975202	2.35221	0.653397	0.685549	3.66431	4.17189	0.751434	0.899668
CROCCP2	chr1:16944750-16957401	0.847951	0.359312	0.303744	0.833354	0.23281	0.498141	1.35852	0.450056	0.695292	0.373048	0.392427	0.319244	0.465931	1.02485	0.549627	0.447918
MIR3675_dup2	chr1:17007749-17007823	0	0	0	0	0	0	0	0	0	0	0	0	0	0	0	0
ESPNP	chr1:17017712-17046652	0	0	0	0	0	0	0	0	0	0	0	0	0	0	0	0
MST1P9	chr1:17081400-17090975	0	0.0301534	0	0.0604732	0	0.0152165	0.0582354	0.0207693	0.0181879	0.0239389	0	0	0.014403	0.0180537	0	0
MIR3675_dup1	chr1:17185443-17185516	0	0	0	0	0	0	0	0	0	0	0	0	0	0	0	0
MST1P2	chr1:16972068-16976915	0.148015	0.0271196	0.0169103	0.157149	0.0442485	0.0575521	0.0877333	0.0501314	0.0680586	0.112378	0	0	0.0957558	0.2149	0	0
FLJ37453	chr1:16160709-16174642	0.05721	0.0760773	0.151432	0.0782069	0.15435	0.199607	0.0606697	0.149914	0.0565914	0.11459	0.122438	0.0598157	0.11812	0.063359	0.020429	0.079846
SPEN	chr1:16174358-16266950	0.272679	0.587829	0.221631	0.368364	0.265232	0.354961	0.464866	0.367561	0.331525	0.752743	0.341119	0.264495	0.798534	0.636088	0.603157	0.267917
MFAP2	chr1:17300998-17308081	0.748046	1.54015	0.157027	2.5386	0.0533546	0.459744	1.0973	0.28169	0.35533	0.217159	0.188354	0.33814	0.471981	0	1.30591	0.0473915
SDHB	chr1:17345224-17380665	3.39151	5.15989	3.2634	4.08396	2.6424	4.32212	3.54674	3.14185	2.88717	3.85609	3.57054	3.09089	3.74172	2.87056	4.56822	3.09012
PADI2	chr1:17393255-17445948	12.1646	21.1205	9.65049	28.3417	19.887	14.1004	27.4511	19.7777	19.7896	5.46527	15.0342	17.1403	5.26503	1.37264	29.4794	3.86951
PADI1	chr1:17531620-17572501	0	0	0	0	0	0	0	0	0	0	0	0	0	0	0	0
CROCC	chr1:17248444-17299474	0.384039	0.154538	0.316459	0.206093	0.349671	0.778285	0.616803	0.725095	0.836554	0.207507	0.440932	0.38103	0.177816	0.293232	0.275751	0.589255
PADI4	chr1:17634689-17690495	0	0.0145468	0.015148	0	0	0	0.0180684	0	0	0	0	0	0	0	0	0
PADI6	chr1:17698740-17728195	0	0	0	0	0	0	0	0	0	0	0	0	0	0	0	0
PADI3	chr1:17575592-17610727	0.19953	0.191691	0.0372972	0.347259	0.144796	0.0195939	0.179592	0.163531	0.272264	0.0327965	0.39674	0.248319	0.0530699	0	0.555798	0
RCC2	chr1:17733250-17766220	2.33619	4.73795	2.5211	4.0036	2.94643	3.15183	3.38333	2.52786	2.23822	4.14384	2.48457	2.53111	3.35051	2.8858	5.04708	2.10448
ACTL8	chr1:18081807-18153558	0	0	0	0	0	0	0	0	0	0	0	0	0	0	0	0
IGSF21	chr1:18434239-18704977	0	0.0957181	0	0.0646721	0	0	0	0	0	1.87131	0	0	0.791436	0.429538	0	0
ARHGEF10L	chr1:17866329-18024370	0.689265	0.697866	0.699071	0.863766	0.556329	0.627446	0.50569	0.688407	0.625765	1.966	0.621852	0.69989	2.11666	1.91604	0.555726	0.859172
PAX7	chr1:18957499-19075360	0	0	0	0	0	0	0	0	0.0205718	0	0	0	0	0	0	0
TAS1R2	chr1:19166092-19186155	0	0	0	0	0	0	0	0	0	0	0	0	0	0	0	0
ATP13A2	chr1:17312452-17338423	6.72196	1.56401	4.7938	2.66339	4.54626	5.13429	1.76342	5.08679	4.40571	2.98032	7.01185	6.27313	2.33286	2.26127	2.56902	4.9385
KLHDC7A	chr1:18807423-18812480	0.0120375	0	0	0	0	0.0119057	0	0	0	0	0.00872721	0	0	0	0	0
IFFO2	chr1:19230773-19282826	0.0458918	0.0872551	0.0913535	0.146642	0.0721925	0.077592	0.0590034	0.0780779	0.0454082	0.0926773	0.167194	0.120545	0.140622	0.12116	0.0963254	0.106052
ALDH4A1	chr1:19197923-19229293	1.17778	1.38441	0.564681	0.885786	0.610289	0.595471	1.05235	0.852689	0.949019	0.90659	0.805617	0.785081	1.07225	0.794154	1.10552	0.951801
MIR4695	chr1:19209687-19209774	0	0	0	0	0	0	0	0	0	0	0	0	0	0	0	0
KIAA0090	chr1:19544583-19578046	0.755271	0.514366	0.599738	0.659681	0.632876	0.744051	0.584613	0.559024	0.62919	1.38735	0.723311	0.745906	1.21675	1.33234	0.855261	0.49137
MRTO4	chr1:19578074-19586622	0.827767	1.56364	0.855849	1.64324	1.35273	1.10691	0.774299	0.909184	0.607414	1.44771	0.910325	0.740625	1.88313	1.50693	1.28103	0.87343
AKR7A3	chr1:19609056-19615280	0.105742	0.0591665	0.0327226	0.000200807	0.044146	0.0535222	0.0804968	0.037581	0.0376653	0.0440966	3.79598e-05	0.14768	0.0882729	0.0424442	0.117162	0.00156419
LOC100506730	chr1:19619740-19622230	0.66414	0.987562	0.537459	1.03621	1.25274	0.558093	1.26218	0.773953	0.786531	0.12982	0.818625	0.467077	0.153682	0.144541	0.837686	0.486443
AKR7L	chr1:19592475-19600568	0	0.016494	0.0180377	0.0236638	0.0411979	0.0242366	0.0197827	0.0530757	0.0349432	0	0	0	0	0.0194941	0.0206213	0.0186211
AKR7A2	chr1:19630458-19638640	12.2726	8.72881	11.4755	15.9181	16.5766	16.3763	14.6645	16.3819	14.5632	3.39085	13.2905	13.5276	4.16149	1.89935	7.25415	12.6333
VPS13D	chr1:12290112-12572098	0.507939	0.516836	0.698751	0.576331	0.834702	1.27427	1.63985	2.46237	3.28808	0.484714	0.597143	0.729252	0.438709	0.41101	2.81533	0.881152
SNORA59B	chr1:12567299-12567451	0	0	0	0	0	0	0	0	0	0	0	0	0	0	0	0
PQLC2	chr1:19638739-19655794	0.92796	0.56833	0.639736	0.568516	0.63619	1.20411	0.525608	0.997657	0.806892	1.49766	0.957025	0.92385	2.44536	2.2988	0.840235	0.789677
HTR6	chr1:19991779-20006055	0	0	0.0283933	0	0	0	0	0	0	0	0	0	0	0	0	0
TMCO4	chr1:20008705-20126410	1.19588	1.5486	0.801743	1.40352	1.15958	1.33754	0.787149	0.921338	0.732555	0.95552	1.28008	1.5482	0.770457	0.608085	1.57955	1.12009
RNF186	chr1:20140521-20141771	0	0.136983	0.107315	0	0.0469318	0.0589622	0.129	0.198703	0	0	0.213862	0.0396429	0.0501548	0	0.174204	0
CAPZB	chr1:19665266-19812066	8.41409	10.0815	6.90297	12.4743	11.3528	7.55752	9.1902	8.8327	8.6759	10.7519	9.37794	9.96389	12.3493	10.6992	10.2936	7.8951
PLA2G2E	chr1:20246799-20250110	0	0	0	0	0	0	0	0	0	0	0	0	0	0	0	0
PLA2G2A	chr1:20301923-20306932	0	0	0.0434059	0	0	0	0	0	0	0	0	0	0	0	0	0
PLA2G5	chr1:20396700-20418394	0	0	0	0	0	0	0	0	0	0	0	0	0	0	0	0
PLA2G2D	chr1:20438433-20446008	0	0.0304034	0	0.0227999	0	0	0	0	0	0.926461	0	0	1.17103	1.23124	0	0
PLA2G2F	chr1:20465822-20476879	0	0	0	0	0	0	0	0	0	0	0	0	0	0	0	0
PLA2G2C	chr1:20490483-20501687	0	0	0	0	0	0	0	0	0	0	0	0	0	0	0	0
UBXN10	chr1:20512577-20519942	0	0	0	0.0196685	0.0166043	0.0404353	0.0160947	0.0146934	0.0287973	0.0337525	0.0464406	0	0.0767988	0.0799109	0	0.0153201
VWA5B1	chr1:20617411-20681387	0	0	0	0	0	0	0	0	0	0	0	0	0	0	0	0
LOC339505	chr1:20686293-20755287	0	0	0	0	0	0	0	0	0	0	0	0	0	0	0	0
CAMK2N1	chr1:20808883-20812728	0	0	0	0	0	0	0.0285529	0	0	0	0	0	0.0958853	0	0	0.0265671
MUL1	chr1:20825940-20834674	0.529713	0.597671	0.708233	0.554358	0.524343	0.649574	0.389626	0.619292	0.718945	1.46632	0.680724	0.36785	1.91152	1.27931	0.443567	0.591115
FAM43B	chr1:20878931-20881513	0	0	0	0	0	0	0	0	0	0	0	0	0	0	0	0
CDA	chr1:20915443-20945400	0	0	0	0.0617699	0	0	0	0.0465739	0	0.0555159	0	0	0.180295	0.051483	0	0
PINK1	chr1:20959947-20978004	5.68533	2.9127	5.17744	4.96167	5.80131	6.73637	3.83402	7.28857	6.01761	2.56783	5.11318	5.80849	2.73435	1.74046	3.79225	5.19457
DDOST	chr1:20978259-20988037	9.31659	14.6333	8.90452	14.2396	9.79405	8.14743	11.3605	9.16894	10.3216	11.1675	9.80572	10.1126	11.5159	10.2557	12.9851	9.60527
KIF17	chr1:20990506-21044317	0	0.035334	0	0	0	0	0.0116829	0	0	0.110007	0	0	0.113093	0.056018	0.0117553	0
SH2D5	chr1:21046224-21059133	0	0.0104397	0	0	0.014846	0	0.0140083	0.050279	0	0	0	0	0	0	0	0
OTUD3	chr1:20208887-20239437	0.0619959	0.0749952	0.0195566	0.066497	0.00787725	0.0662599	0.105126	0.0785177	0.0646918	0.167708	0.075407	0.0519909	0.149687	0.198673	0.103621	0.0672259
HP1BP3	chr1:21069170-21113181	2.58998	4.33714	2.46412	4.28293	3.64011	3.82257	3.53216	3.05865	2.62968	3.54137	3.23192	3.62988	2.81773	2.83846	4.28783	3.52298
UBR4	chr1:19400999-19536746	0.714272	0.691362	0.709995	0.949637	0.875367	0.873935	1.07629	0.885792	1.02057	1.46742	0.725236	0.944558	1.42387	1.29898	1.49286	0.830911
NBPF3	chr1:21766630-21811393	0.147984	0.268717	0.231299	0.282842	0.123611	0.191907	0.0768214	0.27427	0.248817	0.448969	0.348362	0.220932	0.664346	0.743013	0.257576	0.274343
C1orf151	chr1:19923470-19956315	1.13369	1.2869	0.955038	1.59318	1.16528	1.06439	1.12865	1.05613	0.843193	0.827403	1.08427	0.926315	1.00231	0.616257	0.877564	1.00972
C1orf15-NBL1	chr1:19923470-19984949	0.501847	0.938273	0.0859037	0.748504	0.376197	0.120193	1.18293e-05	0.532972	0.00341636	0.126804	0.104021	1.44982e-05	0.000339467	0.0191111	3.80548	0.189767
NBL1	chr1:19969722-19984949	3.52437	3.6714e-05	3.6533	1.69114	1.9332	3.52067	1.48993	1.80882	1.77587	0.227962	2.93034	2.81172	0.371636	0.149382	1.2572	5.09618
ALPL	chr1:21835857-21904905	0.258743	0.10873	0.190821	0.0244052	0.021133	0.108692	0.0192223	0.0678297	0.0692875	0.0872376	0.232501	0.169139	0.150632	0	0.087966	0.377823
ECE1	chr1:21543739-21672034	3.96278	0.893821	1.90014	0.870168	1.56219	2.24755	1.00497	2.83728	3.1413	0.285055	3.16369	3.46557	0.423476	0.176292	1.81744	2.99803
LOC100506801	chr1:21619782-21626362	0	0	0	0	0	0	0	0	0	0	0	0	0	0	0	0
RAP1GAP	chr1:21922707-21995856	0.0186595	0.249466	0	0.121514	0.0586869	0.0739555	0.173258	0	0.0482982	0.0151157	0.0831047	0.0782177	0	0	0.150954	0.0519981
CELA3B	chr1:22303417-22315847	0	0	0	0	0	0	0	0	0	0	0	0	0	0	0	0
CELA3A	chr1:22328148-22339035	0	0	0	0	0	0	0	0	0	0	0	0	0	0	0	0
NCRNA00339	chr1:22351706-22357715	0.899386	0.7764	0.727551	0.56853	0.422758	0.897242	0.748643	0.781071	0.59733	1.47811	0.817241	0.466968	1.17442	1.58231	0.366005	0.713935
USP48	chr1:22004791-22109688	0.616871	0.777426	0.228966	0.563536	0.543891	0.675681	0.472007	0.451721	0.461518	0.758054	0.459969	0.540589	0.587245	0.713713	0.647404	0.440571
WNT4	chr1:22443797-22469519	0	0.00893037	0	0	0	0	0	0	0	0.0124311	0.0221395	0.010472	0.0400908	0.0232021	0.0348005	0
CDC42	chr1:22379119-22419436	11.6759	18.8468	12.8219	18.8538	15.2718	16.0146	17.8307	12.2675	12.6119	21.095	13.9789	13.9568	22.2114	18.4192	17.7768	14.1627
EPHA8	chr1:22890003-22930087	0	0	0	0	0	0	0	0	0	0	0	0	0	0	0	0
C1QA	chr1:22963117-22966175	0.0601002	1.74496	0.0727716	0.846228	0	0	0.131946	0.0395847	0	54.164	0.130331	0	18.986	16.5828	0.129039	0
C1QC	chr1:22970117-22974603	0.263274	4.98701	0.184041	2.48346	0	0	0.328702	0	0	134.632	0.188392	0.0389603	80.1878	79.7929	0.381408	0
C1QB	chr1:22979681-22988029	0.058271	5.53196	0.211002	2.30038	0.0925865	0	0.507048	0.153861	0	134.21	0.294683	0.0402796	74.0894	71.213	0.380626	0.0409971
EPHB2	chr1:23037330-23241823	0	0.0552772	0	0.124687	0	0	0	0	0	1.86224	0	0	1.42247	1.37713	0	0.00944348
MIR4253	chr1:23189651-23189719	0	0	0	0	0	0	0	0	0	0	0	0	0	0	0	0
MIR4684	chr1:23046009-23046091	0	0	0	0	0	0	0	0	0	0	0	0	0	0	0	0
LOC729059	chr1:23337326-23342343	0	0.101846	0	0	0	0	0	0	0	0	0	0	0	0	0	0
KDM1A	chr1:23345940-23410184	1.18735	1.83873	0.93422	2.39247	1.61497	1.66189	1.38504	1.36124	1.05643	1.25223	1.00952	1.09753	1.48681	1.11262	1.95633	1.07619
MIR3115	chr1:23370797-23370865	0	0	0	0	0	0	0	0	0	0	0	0	0	0	0	0
EIF4G3	chr1:21132784-21503381	0.197563	0.281276	0.138694	0.27545	0.34813	0.192314	0.208857	0.191793	0.169216	1.07193	0.223658	0.167006	1.15479	1.09513	0.416962	0.228794
HTR1D	chr1:23518387-23521222	0	0	0	0	0	0	0	0	0	0	0	0	0	0	0	0
HNRNPR	chr1:23636275-23670853	2.19862	3.53289	1.8123	2.72836	3.60524	3.05237	2.11997	2.10411	2.13296	2.95671	2.82777	2.62422	2.60228	3.16429	2.45204	2.28542
ZBTB40	chr1:22778343-22857650	0.160258	0.217174	0.176522	0.339085	0.179041	0.269563	0.308089	0.301196	0.238024	0.584467	0.176211	0.200446	0.397051	0.529206	0.415478	0.193316
TCEA3	chr1:23707554-23751261	0.672399	0.40885	0.716735	0.202742	0.22105	0.888104	0.117861	0.30208	0.130689	0.127658	0.500106	0.557465	0.113858	0	0.323821	1.11147
ZNF436	chr1:23685940-23696357	0.13094	0.217868	0.191226	0.082372	0.0890932	0.095051	0.195629	0.309924	0.178224	0.167865	0.290549	0.153823	0.261205	0.243706	0.15392	0.300253
C1orf213	chr1:23695463-23698330	0	0	0	0	0	0	0	0	0	0	0.0900517	0	0.0207294	0.110248	0	0
LUZP1	chr1:23410515-23495351	0.0554814	0.176579	0.0961222	0.184733	0.081854	0.178268	0.193404	0.120917	0.151203	0.41655	0.115363	0.144532	0.360729	0.358345	0.195664	0.0866734
ID3	chr1:23884408-23886322	0	0.0323441	0.0348839	0	0	0	0	0	0	0.653385	0.0417649	0.039564	0.540056	0.481271	0	0.0404834
MDS2	chr1:23953823-23967056	0	0	0	0	0	0	0	0	0	0	0	0	0	0	0	0
E2F2	chr1:23832919-23857712	0.0125539	0.0947889	0	0.114293	0	0.0243531	0.0277548	0	0	0.0101395	0	0	0.0218687	0.0283891	0.0572306	0.00889374
ASAP3	chr1:23755055-23810750	0.601979	0.403463	0.507923	0.488229	0.42028	0.884997	0.357055	0.372452	0.341432	0.118805	0.478464	0.556322	0.079311	0.0110642	0.606389	0.316812
RPL11	chr1:24018268-24022915	63.1025	149.418	47.0486	151.72	63.4209	45.82	103.461	46.6652	42.2489	55.9004	52.9176	51.7312	73.6688	44.1206	106.498	45.7889
PITHD1	chr1:24104875-24114722	1.49894	2.25553	1.09162	1.05133	1.07604	2.06659	1.65769	2.26313	1.91227	3.29054	1.53945	1.77639	2.07456	1.65058	1.08425	2.19546
LYPLA2	chr1:24117645-24122029	5.61566	6.70623	4.12725	4.79758	5.06838	5.17497	4.37818	4.91667	3.34641	3.49419	5.07802	5.14017	3.63584	2.35553	5.10069	4.14835
HMGCL	chr1:24128366-24151949	2.09153	2.08935	1.68769	2.96501	3.33909	2.88177	1.83967	2.71283	2.26699	1.72839	2.10338	2.59248	1.84688	1.8353	2.09383	2.67096
GALE	chr1:24122088-24127294	7.5237	11.4742	7.60705	11.4344	8.84183	11.3268	9.24148	8.48963	6.81274	3.85463	9.37296	9.71587	3.66817	1.93132	9.19611	12.6636
CNR2	chr1:24200459-24239817	0	0	0	0	0	0	0	0	0	0	0	0	0	0	0	0.0270847
MIR378F	chr1:24255559-24255637	0	0	0	0	0	0	0	0	0	0	0	0	0	0	0	0
FUCA1	chr1:24171571-24194859	3.16471	1.25236	2.53963	1.06966	2.09993	3.42975	0.857559	2.24023	2.29864	8.24318	3.48186	4.11507	4.651	5.8665	0.347531	7.53927
PNRC2	chr1:24286300-24289949	2.35337	3.06806	2.7229	3.00504	2.55524	2.39766	3.02397	2.48998	3.13172	2.01754	2.21582	1.66468	3.36644	2.36599	2.14453	3.03133
MYOM3	chr1:24382530-24438665	0	0	0	0	0	0	0	0	0	0	0	0	0	0	0	0
IL22RA1	chr1:24446260-24469775	0	0	0	0	0	0	0	0	0	0	0	0	0	0	0	0
IL28RA	chr1:24480646-24513765	0	0	0	0.0124851	0.0107211	0	0	0	0.00904062	0.506888	0	0	0.281317	0.601277	0.0634998	0.043607
LOC284632	chr1:24526729-24538180	0	0.0218616	0	0	0	0	0	0	0	0	0	0	0	0	0	0
TCEB3	chr1:24069855-24088549	1.28628	1.90034	0.948927	2.14055	1.28884	1.50424	1.8233	1.10559	1.12029	1.17148	1.18136	1.2627	1.08511	0.695524	2.6384	1.13892
LOC100506963	chr1:24086871-24104787	7.75198e-05	0.0864301	0.0690408	4.88574e-06	0.0873059	0.384614	0.421793	0.161328	0.288314	0.438647	0.450428	0.424091	1.26504e-06	1.14713e-07	2.92162e-07	0.168626
NIPAL3	chr1:24742244-24799473	0.644331	0.722247	0.446165	0.638533	0.692852	0.710531	0.618683	0.750434	0.504741	0.618267	0.867685	0.755449	0.287058	0.274801	0.6449	0.614569
LDLRAD2	chr1:22138757-22151714	7.46669e-08	0.0152546	0	0.0203798	5.62137e-08	4.35471e-08	5.71142e-11	0.0116763	6.52886e-08	6.62328e-09	8.6168e-12	0.0104857	0	1.33283e-09	5.59093e-09	0
HSPG2	chr1:22148736-22263750	0.0745923	0.127166	0.0283808	0.177627	0.0864688	0.0272239	0.196279	0.0616539	0.0685808	0.0851552	0.0701131	0.0622028	0.0609877	0.0343292	0.321989	0.0169644
RCAN3	chr1:24829386-24862427	0.296485	0.413698	0.345822	0.242078	0.456187	0.521404	0.330585	0.452828	0.384857	0.617765	0.242014	0.28828	0.783072	0.332714	0.448809	0.317211
C1orf130	chr1:24882566-24935818	0.57821	0.438812	1.52672	0.30395	2.216	0.986488	0.613025	2.29703	1.65634	0.110818	1.28866	1.1376	0.128482	0.023411	0.193172	0.667687
SRRM1	chr1:24969593-24999772	1.29658	1.90588	0.902514	1.88977	1.2517	1.35979	1.6989	1.16169	1.17066	2.13763	0.932085	0.78664	1.63252	1.92044	2.262	0.848172
RUNX3	chr1:25226001-25291501	0	0.0809108	0.0107702	0.0164445	0	0	0.0582088	0.0537701	0	2.98093	0.0129449	0	1.64863	1.8669	0	0
SYF2	chr1:25548766-25559013	0.982549	1.36413	0.803671	1.41618	1.19653	0.636878	1.00294	1.19637	0.991764	1.47509	0.951903	0.777249	1.32297	1.23664	0.884682	0.712645
C1orf63	chr1:25568739-25573985	0.365584	0.517468	0.0894224	0.296032	0	0.219367	0.350554	0.279826	0.0323614	2.15012	0.168635	0.261821	1.65926	1.64163	0.368032	0.2355
RHD	chr1:25598980-25656936	0	0	0	0	0	0.105216	0	0.017336	0	0	0	0	0.0250858	0.0941124	0	0
CLIC4	chr1:25071759-25170815	1.89396	4.57499	2.64649	3.23356	3.88841	3.2959	2.52859	1.6025	1.28105	4.24247	2.74277	2.49425	5.53754	5.90852	4.60894	3.06427
GRHL3	chr1:24645811-24690970	0.326922	0.525481	0.231414	0.41187	0.133175	0.378212	0.121601	0.133944	0.141268	0.0859091	0.281536	0.310621	0.148974	0.0203459	0.401236	0.233113
C1orf201	chr1:24683488-24741587	0.163894	0.146517	0.153016	0.229245	0.108796	0.19138	0.204721	0.104045	0.134278	0.311718	0.111135	0.14646	0.360709	0.204065	0.195819	0.115728
LDLRAP1	chr1:25870075-25895377	0.95019	1.03631	0.905458	1.01256	1.17593	1.48832	1.3742	1.28342	0.873999	0.751255	0.859936	1.00929	0.877239	0.665135	1.34088	0.807672
MAN1C1	chr1:25943958-26111258	0	0	0	0.122653	0.0174668	0	0	0	0	0.388052	0	0	0.0945107	0.164052	0	0
TMEM50A	chr1:25664788-25688852	2.78454	1.74116	2.11921	1.5328	2.28764	2.37514	1.40648	1.97198	1.81307	5.02106	2.77278	2.71082	5.27889	5.36016	1.18538	2.66279
RHCE	chr1:25688739-25747363	0.0628781	0.0399778	0.0392733	0	0.0487696	0.0578546	0.0473723	0.0427463	0.0417673	0	0	0.0430099	0.0555157	0.0958635	0	0.155382
SRSF10_dup2	chr1:24292936-24306953	0	0.0154115	0.0144959	0.0835306	0.0903719	0	0.0855907	0	0	0	0.0164569	0	0.110604	0.0755301	0	0.0256589
C1orf135	chr1:26160496-26185848	0	0.112413	0	0	0.0218696	0.0268569	0	0	0.0195156	0.0223619	0	0	0.0521423	0	0.0470059	0
PAQR7	chr1:26187974-26197744	0	0	0.0304878	0.045359	0	0.0234919	0	0.0166584	0.0163932	0.17549	0	0	0.19486	0.128489	0	0.0353216
TMEM57	chr1:25757387-25826698	0.949533	0.799401	0.857799	0.945366	0.699536	0.922952	0.972327	0.718003	0.859639	0.600711	1.09104	1.12469	0.611799	0.50675	1.25755	0.806862
PAFAH2	chr1:26286257-26324648	1.70772	1.9133	1.05609	1.7711	1.75822	1.76591	1.85298	1.38205	1.08035	0.852122	1.34844	1.46522	0.722274	0.709066	1.68454	1.70878
STMN1	chr1:26210676-26233368	0.333776	1.79316	0.185733	1.27227	0.278313	0.440618	0.85032	0.528555	0.540907	4.82575	0.437384	0.385691	3.67791	3.10422	2.39283	0.487064
MIR3917	chr1:26232852-26232945	0	0	0	0	0	0	0	0	0	0	0	0	0	0	0	0
EXTL1	chr1:26348270-26362954	1.18622	1.84893	1.39049	1.52997	1.78171	2.37953	2.14693	1.66113	1.63288	0.390793	1.81246	1.66804	0.213979	0.0138418	3.96977	3.25794
FAM54B	chr1:26146396-26159433	1.19665	2.07414	1.05323	1.64927	1.17337	1.54023	1.33938	1.0102	0.713514	1.39711	1.30511	1.35052	1.38796	1.04949	1.18257	1.08778
LOC646471	chr1:26146444-26150097	0.0176732	0.0202784	0.0114172	0.0316686	0.040857	0	0.0376106	0.0235235	0.0237115	0.0948225	0.0124496	0.0120351	0.0618871	0.103801	0	0.036957
TRIM63	chr1:26377797-26394121	0.062262	0.0194297	0.019619	0	0	0.151392	0.0236054	0.0429337	0	0.0506827	0.0680474	0.0903572	0	0	0	0.0452114
GRRP1	chr1:26485510-26489119	0	0.0306133	0	0	0.0492001	0.0623697	0	0	0	0	0	0	0	0	0	0
SLC30A2	chr1:26364513-26372604	7.75324	6.04183	7.64529	6.3416	6.97264	7.92116	5.57891	8.13577	7.86295	0.960565	7.3614	8.66689	0.970341	0.204936	5.91996	7.17635
ZNF593	chr1:26496387-26497364	2.56328	5.24387	1.84086	5.22876	2.23438	2.16461	1.48541	1.79863	1.68702	1.6742	1.39771	2.11486	1.6687	1.47954	2.57761	2.96981
CATSPER4	chr1:26517118-26529033	0	0	0	0	0	0	0	0	0	0	0	0	0	0	0	0
SEPN1	chr1:26126666-26144713	3.00069	1.3712	1.6568	1.70886	2.26527	1.99701	1.20617	1.21216	1.47405	3.64486	1.72742	1.9471	4.98528	4.36122	1.35431	1.87703
SH3BGRL3	chr1:26606212-26608013	11.3846	16.1571	10.013	15.6958	10.9159	12.6255	13.7236	11.1494	10.2019	36.8962	10.4709	12.2932	39.6449	29.5082	17.9728	9.61347
CEP85	chr1:26560692-26605299	0.175719	0.15887	0.0712268	0.145486	0.122087	0.138179	0.224557	0.148612	0.125485	0.330287	0.113206	0.07084	0.295486	0.25779	0.238373	0.143343
AIM1L	chr1:26648349-26680621	0	0	0	0.0104903	0	0	0.016928	0	0	0	0.0083722	0	0	0	0	0
ZNF683	chr1:26688124-26699266	0	0	0	0	0	0	0	0	0	0	0	0	0.0344407	0	0	0
LIN28A	chr1:26737268-26756219	0	0	0	0	0	0	0	0	0	0	0	0	0	0	0	0
CNKSR1	chr1:26503980-26516375	0.924651	1.01533	0.526773	0.837405	0.473077	0.661241	0.852411	0.656056	0.521775	0.21437	0.676973	0.585792	0.186474	0.0179546	0.511044	0.434867
HMGN2	chr1:26798901-26803133	21.7002	25.6403	17.8265	25.02	26.345	19.2391	19.5238	19.7913	17.7281	19.8526	20.6585	20.6103	19.7933	16.1708	21.9458	22.2548
UBXN11	chr1:26608772-26644756	0.284403	0.6153	0.141897	0.682997	0.277769	0.257809	0.240505	0.203567	0.220275	4.29106	0.2765	0.090464	4.46094	4.07527	0.331895	0.116805
CD52	chr1:26644410-26647014	0	3.78684	0.192701	3.44403	0	0	0.741439	0.101498	0	52.5054	0.421944	0.243492	69.279	43.4082	0.46597	0.233538
DHDDS	chr1:26758801-26797795	1.47619	2.89298	1.07399	2.71826	1.63203	1.60194	2.30924	1.34019	1.08747	1.80082	1.24878	1.73348	1.86011	1.68128	3.85119	1.43347
PDIK1L	chr1:26437655-26452026	0.449787	0.335863	0.38391	0.344891	0.509876	0.584668	0.277794	0.386135	0.491569	0.2148	0.533524	0.456599	0.31452	0.271219	0.490435	0.422305
RPS6KA1	chr1:26856248-26901520	1.77531	0.949355	1.3559	1.31032	1.16698	2.06375	1.12031	1.29001	1.06805	5.04226	1.61347	2.07755	5.90511	4.75811	1.45127	1.57746
MIR1976	chr1:26881032-26881084	0	0	0	0	0	0	0	0	0	0	0	0	0	0	0	0
SFN	chr1:27189632-27190947	3.42363	2.68624	2.22235	2.42884	2.57882	4.57026	1.63353	4.22211	4.39417	0.522867	3.33894	2.9958	0.617566	0.0398602	4.3467	4.97581
GPN2	chr1:27205872-27216869	1.08566	0.949179	0.449191	1.00993	0.833192	1.10837	0.854882	0.855612	1.04831	0.659159	0.626293	0.535646	0.993353	0.561965	1.00058	0.64358
ZDHHC18	chr1:27153200-27182211	0.405476	0.343987	0.278175	0.271107	0.254687	0.704345	0.456289	0.383239	0.431929	2.2133	0.482298	0.436682	2.79329	2.20672	0.365803	0.518443
PIGV	chr1:27114453-27124894	1.0435	0.761027	0.531571	0.795232	0.701111	0.896399	0.646873	1.07071	1.13115	0.535007	1.11592	0.879971	0.588002	0.547487	0.570217	0.788209
NR0B2	chr1:27237974-27240567	0.051778	0	0	0	0	0	0	0	0	0	0	0	0	0	0	0
GPATCH3	chr1:27216978-27226962	0.252667	0.365156	0.183882	0.577405	0.217777	0.326549	0.509243	0.262634	0.145501	0.496678	0.258849	0.300494	0.720331	0.501924	0.337247	0.296475
NUDC	chr1:27248223-27272887	3.3316	6.12374	2.65329	3.38711	3.21313	3.81971	3.14528	3.66062	2.88058	3.29098	2.79108	3.0462	3.77015	3.51753	3.56532	3.00039
C1orf172	chr1:27276046-27286901	1.57015	1.42358	1.81645	1.46117	1.73603	1.97848	1.33336	1.77586	1.66188	0.208917	2.06631	1.97802	0.0625176	0	1.63454	2.22899
TRNP1	chr1:27320194-27327377	0.0413692	0.097491	0.129116	0.195915	0.137237	0.0798727	0.0321541	0.168924	0.0283944	0	0.188174	0.0586635	0	0	0.0324851	0
FAM46B	chr1:27331510-27339333	0.5853	0.178329	0.61172	0.159904	0.565024	2.56531	0.238781	0.840273	0.395841	0.0730156	0.788314	0.8338	0.075265	0	0.193837	0.662007
SLC9A1	chr1:27425299-27481451	1.58655	0.639638	1.01354	0.690897	1.18561	1.25671	0.762683	1.27736	1.28837	1.36	1.29727	1.69167	1.2343	1.18276	0.948961	1.43244
TMEM222	chr1:27648635-27662891	1.43605	1.19704	1.07307	1.44849	1.10489	1.26969	0.824751	0.855905	0.673039	1.45225	1.09596	1.08632	1.48944	1.64074	1.33357	1.16549
LOC644961	chr1:27650364-27653016	0	0	0	0	0	0	0.0183816	0	0	0.0189591	0.0176426	0	0.043558	0.0181161	0	0.017376
WDTC1	chr1:27561006-27635110	1.85897	1.8479	1.64498	2.36337	2.24447	2.05887	1.52505	1.87205	1.42657	1.67369	1.99399	2.057	1.57497	1.4695	2.66823	1.51455
FCN3	chr1:27695600-27701315	0	0	0	0	0	0	0	0	0	0	0	0	0	0	0	0
CD164L2	chr1:27705595-27709805	0.327232	0.449577	0.251407	0.211602	0.259224	0.726649	0.103078	0.345138	0.150408	0.112401	0.402217	0.415046	0.0397356	0	0.175051	0.131481
GPR3	chr1:27719151-27722317	0	0	0	0	0	0	0	0	0	0.0279272	0	0	0.0307013	0	0	0
SYTL1	chr1:27668482-27680423	4.13852	14.6154	3.2136	6.37264	3.80374	3.67242	5.38513	4.16214	3.37501	1.43535	3.35651	4.25735	1.88917	0.310285	6.15933	2.74054
MAP3K6	chr1:27681669-27693337	0.924219	1.39358	0.556944	0.894914	0.707781	0.95666	1.1732	1.00062	0.920471	0.880116	0.757579	0.799391	0.789131	0.616924	1.4798	0.533502
FGR	chr1:27938800-27961727	0.142024	0.864093	0.0158889	0.818473	0.128961	0.106248	0.640775	0.127491	0.0907409	20.7043	0.176992	0.0821445	23.6036	20.9004	0.295947	0
IFI6	chr1:27992571-27998724	9.21247	23.3573	46.5411	23.0462	6.99085	9.60175	7.47463	9.37811	10.1081	234.962	8.17964	8.71209	111.753	107.043	4.56501	7.92982
AHDC1	chr1:27860755-27930143	0.639877	0.478791	0.468015	0.564117	0.316003	0.980417	0.727715	0.678655	0.497175	0.214233	0.540345	0.728778	0.157639	0.20513	0.896724	0.63214
STX12	chr1:28099693-28150963	3.47365	5.44103	2.45188	4.68245	3.47182	3.33621	5.41954	3.34849	2.6999	2.95875	3.1743	3.14985	3.33496	2.70708	4.73964	3.58711
WASF2	chr1:27730733-27816678	6.13728	10.0459	6.02728	10.6646	7.62911	7.00465	11.4267	6.2346	5.9123	6.35381	7.04516	6.78499	6.59632	5.43077	14.9112	6.53632
C1orf38	chr1:28199054-28213193	0	0.459225	0.088281	0.441172	0.0363579	0	0.288815	0.0310826	0	11.5553	0.0667615	0.0161511	8.52604	8.87324	0.158017	0
RPA2	chr1:28218048-28241236	1.18043	1.3296	0.567854	1.28773	0.638034	0.798794	1.47249	0.802987	0.623569	1.2743	0.805079	0.529805	1.45815	1.39304	1.37316	0.895549
PPP1R8	chr1:28157251-28178183	0.665914	1.05122	0.397453	0.991763	0.547275	0.912884	0.763503	0.528629	0.398563	0.832113	0.556365	0.526092	1.07476	1.13026	0.785961	0.614514
SCARNA1	chr1:28160911-28161077	0	0	0	0	0	0	0	0	0	0	0	0	0	0	0	0
XKR8	chr1:28286503-28294604	0.535539	0.290748	0.388145	0.276413	0.382755	0.528581	0.555636	0.72651	0.262577	0.850893	0.366535	0.488846	0.460303	0.457894	0.384816	0.551979
SMPDL3B	chr1:28261503-28285663	2.31897	1.08115	1.97973	0.918542	2.60298	1.91464	0.90849	1.39644	2.10154	0.361133	2.52118	2.59841	0.170883	0.0276148	1.38643	1.88145
LOC653566	chr1:28421445-28423069	1.11232	2.77709	1.62565	1.89182	1.97109	2.09488	2.05187	1.63225	1.78478	2.0683	2.27803	2.07675	2.23788	1.74524	2.39164	1.86936
ARID1A	chr1:27022521-27108601	0.883439	1.24335	0.779379	1.55812	1.0051	1.35123	1.52299	0.965794	0.809296	1.75568	1.13721	1.2202	1.41629	1.41112	1.97749	0.812405
DNAJC8	chr1:28526789-28559542	1.51083	2.77311	1.87066	3.18444	2.08574	1.75725	2.78995	2.2637	1.35865	3.73087	1.64791	1.67599	4.28128	3.57577	1.70987	1.69209
ATPIF1	chr1:28562601-28564616	15.8862	17.2008	14.258	11.9469	11.5667	10.7811	14.8738	11.3444	9.75095	7.17555	14.0802	11.4495	7.39566	5.33073	16.3634	10.4184
EYA3	chr1:28296854-28415148	0.280401	0.789085	0.365402	1.26957	0.370371	0.296443	0.774409	0.400104	0.45869	0.696508	0.396222	0.348521	0.478245	0.435555	1.01111	0.378408
MED18	chr1:28655512-28662478	1.43248	1.81562	1.23617	1.39217	0.920821	1.74525	1.56409	1.15824	1.09385	1.34525	1.28445	0.725534	1.35283	1.10459	1.8636	1.45526
SESN2	chr1:28585962-28609002	2.24901	2.29072	0.980952	3.10126	1.54726	1.72656	2.83004	1.52779	1.6298	1.6529	1.65597	2.03622	1.10356	0.751564	2.90019	2.17065
FAM76A	chr1:28052489-28089423	0.550959	0.459187	0.362156	0.526015	0.297917	0.618726	0.573562	0.405916	0.379641	0.446313	0.553851	0.326679	0.556776	0.559883	0.516444	0.57484
PTAFR	chr1:28473676-28520447	0.0642576	0.344464	0	0.135076	0.0566799	0	0.0752313	0	0.0106069	7.46658	0.0467831	0.0111331	7.41806	7.39147	0.0547387	0
TRNAU1AP	chr1:28879528-28905057	0.514621	0.360167	0.334269	0.550562	0.229041	0.420576	0.477799	0.471595	0.676398	0.789716	0.31426	0.280177	0.848656	0.696214	0.554481	0.165145
SNHG12	chr1:28905049-28908366	0.381301	0.407914	0.0613758	0.423461	0.0814401	0.271232	0.0720952	0	0.0643441	6.33215	0.0733845	0.0748299	5.33992	5.2994	0.221811	0.0766058
SNORD99	chr1:28905254-28905334	0	0	0	0	0	0	0	0	0	0	0	0	0	0	0	0
SNORA61	chr1:28906275-28906405	0	0	0	0	1.60449	0	0	0	0	1.64445	0	0	0	0	0	0
SNORA44	chr1:28906892-28907024	0	0	0	0	0	0	0	0	0	1.72805	0	0	7.53621	3.2952	0	0
SNORA16A	chr1:28907431-28907565	0	0	0	0	0	0	0	0	0	2.12876	0	0	0	0	0	0
RAB42	chr1:28918711-28921088	0	0.250681	0	0.229281	0.0440501	0	0.192403	0	0.150328	8.75232	0.0410944	0	7.03136	6.43727	0	0
RNU11	chr1:28975111-28975246	0	0	0	0	0	0	2.52792	0	0	0	0	0	0	0	0	0
TAF12	chr1:28929608-28969604	1.08977	1.28518	0.732415	2.08208	0.988912	0.76713	0.943005	0.620662	0.620688	1.86273	1.03034	0.852104	1.29627	0.945939	1.21863	0.928589
GMEB1	chr1:28995239-29042115	0.112289	0.345331	0.108001	0.0861197	0.115043	0.161488	0.113533	0.130806	0.102853	0.234045	0.227529	0.136355	0.381841	0.346924	0.269867	0.226498
OPRD1	chr1:29138653-29190208	0	0	0	0	0	0	0	0	0	0	0	0	0	0	0	0
YTHDF2	chr1:29063132-29096287	1.46222	2.4178	1.28358	1.93547	1.38288	2.45576	2.74889	2.07489	1.4074	1.50854	1.6224	1.69331	2.26018	1.48012	3.31171	1.39195
SRSF4	chr1:29474249-29508637	1.20598	1.27773	0.732582	1.95307	1.23529	1.51939	1.66463	1.58611	1.40812	2.19333	1.12696	1.20075	1.89106	1.95536	1.15347	1.18285
SNHG3	chr1:28832454-28837404	0.160514	0.555558	0.156135	0.539761	0.191232	0.189769	0.352949	0.212932	0.191715	0.561323	0.183169	0.238051	0.466748	0.526048	0.455694	0.14517
RCC1	chr1:28832454-28865708	0.910264	2.05524	0.607571	2.4149	1.23663	1.18869	0.988041	1.0051	0.570167	0.886182	0.904737	0.710751	1.07633	0.558816	1.08992	0.62085
MECR	chr1:29519384-29557454	0.560183	1.78579	0.363195	1.70048	0.72851	0.682034	1.02007	0.530669	0.483292	0.429294	0.405131	0.565773	0.689958	0.534928	0.6958	0.518892
PHACTR4	chr1:28696092-28826881	0.689458	1.23263	0.443939	1.07949	0.546705	0.560669	0.752765	0.451871	0.366802	1.93176	0.515204	0.540033	1.34301	1.41165	0.894566	0.565833
MATN1	chr1:31184123-31196432	0	0	0.0105768	0	0	0	0	0	0	0	0	0	0.0151857	0	0	0
LOC100129196	chr1:31191618-31199593	0	0.0180513	0	0	0	0.0324946	0	0	0	0	0	0	0.0276864	0.0738455	0	0.0457921
LAPTM5	chr1:31205314-31230683	0.224607	4.17564	0.243204	3.47083	0.149197	0.0293496	1.03365	0.0667499	0.0218276	110.929	0.377393	0.088714	95.8512	83.007	0.76093	0.0692258
MIR4420	chr1:31212002-31212079	0	0	0	0	0	0	0	0	0	0	0	0	0	0	0	0
SDC3	chr1:31342312-31381480	0.764767	0.274957	0.390927	0.375586	0.331039	0.611414	0.200177	0.465911	0.418825	6.24313	0.665933	0.761008	3.07974	2.8086	0.249733	0.543662
NKAIN1	chr1:31652591-31712734	0	0.0572494	0	0	0	0	0.0182445	0.0165948	0	0.0596874	0	0	0	0.0186566	0	0
SNRNP40	chr1:31732414-31769644	0.997127	1.6548	0.656039	1.56652	0.934109	0.701862	0.873565	0.626081	0.843467	1.17558	0.968379	0.88107	1.13053	0.988578	1.13609	0.579294
ZCCHC17	chr1:31769841-31837780	0.867388	1.40977	0.464034	0.720478	0.729969	0.98488	0.961861	1.06394	0.6232	1.10966	0.6122	0.379541	0.84724	0.948927	0.841215	0.44725
PUM1	chr1:31404352-31538564	1.00321	1.54392	0.853352	1.88997	0.980609	1.44326	2.13159	1.35219	1.13001	1.91745	1.21402	1.06091	2.08999	1.82902	2.203	1.14356
SNORD103B	chr1:31408535-31408623	0	0	0	0	0	0	0	0	0	0	0	0	0	0	0	0
SNORD103A	chr1:31421964-31422052	0	0	0	0	0	0	0	0	0	0	0	0	0	0	0	0
SNORD85	chr1:31441009-31441084	0	0	0	0	0	0	0	0	0	0	0	0	0	0	0	0
PRO0611	chr1:31460911-31461481	0	0	0	0	0	0	0	0	0	0	0	0	0	0	0	0
FABP3	chr1:31838099-31845923	330.323	263.704	265.293	318.735	324.667	342.924	202.021	354.078	293.127	40.8631	361.693	360.421	39.6554	8.4931	157.644	387.268
PTPRU	chr1:29563027-29653325	0.0124688	0.228276	0.0330418	0.170643	0.0443608	0	0.193698	0.00827141	0.0317107	0.174151	0.064359	0.0772515	0.0852844	0.0774464	0.0803925	0.329472
LOC149086	chr1:31971838-31974167	0	0	0	0.0543614	0	0	0	0	0	0	0	0	0	0	0.0465153	0
LOC284551	chr1:31984035-31989846	0.0226067	0	0	0	0	0	0.0172006	0	0	0	0.0161919	0	0	0	0	0.032067
HCRTR1	chr1:32083300-32092919	0	0	0	0	0	0	0	0	0	0	0	0	0	0	0	0
PEF1	chr1:32095462-32110838	2.49164	4.63589	1.88955	4.30394	2.27568	2.41095	3.36379	2.49106	1.89237	2.69681	2.68042	2.46566	3.01613	1.90189	3.76119	1.86393
TINAGL1	chr1:32042085-32053287	2.24933	2.46606	1.26529	1.58647	0.960942	1.28419	2.24584	2.04202	1.30832	0.679494	2.19046	2.32209	0.660222	0.120458	1.17692	0.270904
COL16A1	chr1:32117847-32169768	0	0.0559525	0	0.0640017	0.00838343	0.0428535	0.0374269	0.013937	0.00655163	0.0257399	0.0223938	0	0.0264002	0.00788555	0.0444334	0.0145293
BAI2	chr1:32192717-32229648	0	0	0	0	0	0	0	0	0	0	0	0	0	0	0	0
MIR4254	chr1:32224260-32224336	0	0	0	0	0	0	0	0	0	0	0	0	0	0	0	0
SPOCD1	chr1:32256024-32281580	0	0.00820603	0.00888138	0	0	0	0.0107806	0	0	0.51436	0	0	0.242894	0.260156	0.0109011	0
KHDRBS1	chr1:32479490-32509472	2.58001	5.43802	2.02927	4.69164	3.4848	2.81399	4.24504	2.53918	2.29927	4.35995	2.09764	2.24669	4.82344	3.54982	4.25157	2.12369
TMEM39B	chr1:32538502-32568467	0.486755	0.187986	0.438548	0.221373	0.349179	0.277936	0.379189	0.26885	0.419794	0.557042	0.261476	0.267736	0.450249	0.430647	0.267502	0.312764
SERINC2	chr1:31882411-31907527	90.6717	59.8733	61.8788	57.1823	62.1129	69.3652	67.8859	72.78	69.0209	6.51087	64.1669	69.3	8.83257	4.23994	76.0782	60.0946
TXLNA	chr1:32645344-32663886	1.10595	1.90969	1.04856	1.62475	1.03773	1.30321	1.95271	1.20009	1.01313	2.02791	1.23876	1.1483	2.10384	1.73941	2.7018	0.884619
CCDC28B	chr1:32666201-32670991	0	0.0386035	0.0406682	0	0.102816	0	0.147252	0	0.043535	0.107488	0	0	0.805453	0.346891	0.1006	0
IQCC	chr1:32671235-32674288	0	0	0.0138307	0	0	0	0	0.0606014	0.0781297	0.0180188	0.0159005	0.0640881	0.079629	0.0899372	0	0.0585818
DCDC2B	chr1:32674694-32681797	0	0	0	0	0	0	0	0	0	0.0349092	0	0	0	0.0656876	0	0
TMEM234	chr1:32681797-32687926	0.280084	0.352749	0.211489	0.254841	0.217223	0.424762	0.127415	0.38317	0.189311	0.392052	0.162479	0.438708	0.245317	0.408444	0.178263	0.202595
EIF3I	chr1:32687970-32697205	12.1916	25.2793	10.7469	22.4969	13.6239	11.9035	13.145	11.4145	10.6794	8.8705	12.2212	11.5121	11.2957	6.29605	13.7667	9.92655
MTMR9LP	chr1:32697260-32707311	0.183167	0.170951	0.148199	0.3385	0.100086	0.0921913	0.27233	0.0829907	0.0398483	0.533153	0.0673014	0.0431154	0.130546	0.185334	0.228681	0.0438376
KPNA6	chr1:32573643-32642168	1.0396	1.50858	0.945726	1.41918	1.00189	1.17652	1.43981	0.996529	0.954385	1.28528	1.07212	1.06942	1.24534	0.961389	1.67995	0.901814
FAM167B	chr1:32712817-32714461	0.547602	1.33672	0.715353	3.11999	0.531161	0.473803	2.33037	0.446686	0.350826	0.0552891	0.192696	0.281004	0.16792	0.0997932	1.97186	0.141349
PTP4A2	chr1:32372021-32403988	4.3177	6.6418	4.98539	5.32518	5.43672	5.52484	8.57982	6.08065	5.51934	7.04001	5.60222	5.6696	8.60621	7.71826	8.03578	5.36272
HDAC1	chr1:32757707-32799224	1.3516	3.28193	1.78703	3.83965	2.44468	2.3958	2.98058	2.05928	2.47212	1.8773	2.39689	2.66372	1.89947	1.35098	2.77706	1.60865
LCK	chr1:32716839-32751766	0.0299075	0.125749	0.0721405	0.0269533	0.0237418	0	0.021881	0	0.0194142	0	0	0	0.15959	0	0	0
LOC100128071	chr1:32826870-32827844	0	0.0633241	0	0	0	0	0.0864072	0	0.0801857	0.100989	0.0872089	0.0824101	0	0.183326	0.0848287	0
MARCKSL1	chr1:32799439-32801834	11.6018	11.9267	8.65929	17.0828	15.3865	17.3649	11.9646	9.45785	8.92878	1.78512	11.3314	12.6435	3.03448	0.757048	15.9643	6.15453
ZBTB8B	chr1:32930657-32953459	0	0	0	0	0	0	0	0	0	0	0	0	0	0	0	0
TSSK3	chr1:32827861-32829924	0.047188	0	0	0	0	0	0	0	0	0.0381884	0	0	0.125795	0.107326	0.0369312	0
ZBTB8OS	chr1:33087306-33116185	0.845885	1.05747	1.1435	0.752559	1.31566	1.69601	0.657412	0.790952	0.796982	1.01163	1.20391	0.662132	1.02429	2.04469	1.1875	1.48685
ZBTB8A	chr1:33004771-33071542	0.203484	0.250566	0.167076	0.207699	0.128109	0.222535	0.242697	0.153799	0.163441	0.108191	0.190019	0.177574	0.114806	0.0719309	0.349945	0.259702
BSDC1	chr1:32830704-32860062	2.59842	2.67497	2.1224	3.19937	2.28445	3.12694	2.70868	2.18746	1.9174	1.96385	2.89219	2.51832	1.82667	1.30517	3.07725	1.99014
YARS	chr1:33240839-33283633	2.79811	5.28243	1.94106	4.91169	3.05103	2.72161	3.51215	2.70942	3.08104	2.31481	2.39878	2.42068	3.06303	2.08515	4.73114	2.04957
S100PBP	chr1:33283175-33324476	0.108066	0.220865	0.139685	0.142636	0.177518	0.194548	0.120561	0.206004	0.0802809	0.567482	0.180645	0.120735	0.441156	0.423173	0.130098	0.233239
FNDC5	chr1:33327868-33338082	0.115446	0	0.0176325	0	0.0877691	0	0.075224	0.0194316	0.018953	0	0	0.0632342	0.113492	0	0	0.0813666
HPCA	chr1:33352097-33360247	0	0	0	0	0	0	0	0	0	0	0	0	0	0	0	0
TMEM54	chr1:33360195-33366953	3.28004	3.33712	2.36185	3.05253	3.33249	4.05876	2.97971	3.7483	4.3166	0.749334	3.37971	2.92547	0.394172	0.464646	3.20653	3.04872
RNF19B	chr1:33402049-33430286	1.03966	1.19228	0.965331	1.60829	1.38102	1.24513	1.54069	1.8617	1.4811	3.05682	1.12311	1.33219	3.36731	3.36102	1.13331	1.67554
KIAA1522	chr1:33207511-33240571	6.86475	9.93359	3.63669	5.82256	4.98347	7.18307	4.41892	4.00886	3.84493	1.12368	6.4555	5.72128	1.21353	0.278654	5.62395	4.19498
ADC	chr1:33546713-33585995	0.0303253	0.0692889	0	0.0546365	0	0.0296947	0.0223987	0.0606484	0.0196502	0.0976093	0.0433305	0.0211835	0.026149	0.0227413	0.0229685	0
TRIM62	chr1:33611002-33647671	0.158021	0.286341	0.0636519	0.245402	0.0703578	0.260026	0.341858	0.176038	0.137842	0.200236	0.115322	0.108183	0.225899	0.265801	0.58567	0.0873078
ZNF362	chr1:33722173-33766320	1.28166	1.19953	1.31873	1.79219	1.70951	1.76891	0.960857	1.26991	1.01452	1.46378	1.79054	2.03374	0.989487	1.16826	0.956445	1.77742
PHC2	chr1:33789223-33841194	2.01371	1.36707	1.42973	1.78842	1.77568	2.01496	1.22364	1.3688	1.58156	4.34941	1.59643	1.5843	4.4491	3.54306	1.50637	1.97259
MIR3605	chr1:33797993-33798093	0	0	0	0	0	0	0	0	0	0	0	0	0	0	0	0
ZSCAN20	chr1:33938231-33961995	0	0.0395495	0.0160887	0.0352822	0.0203818	0	0.0291843	0	0.00864096	0.104331	0.0187969	0	0.104456	0.0688948	0	0
CSMD2	chr1:33979608-34631443	0	0	0	0	0	0	0	0	0	0	0	0	0	0.00357901	0	0
HMGB4	chr1:34326075-34330392	0	0	0	0	0	0	0	0	0	0	0	0	0	0	0	0
LOC402779	chr1:34334556-34351059	0	0	0	0	0	0	0	0	0	0	0	0	0	0	0	0
C1orf94	chr1:34632623-34684731	0	0	0	0	0	0	0	0	0	0	0	0	0	0	0	0
GJB5	chr1:35220720-35224112	0.794079	0.0964435	0.49216	1.60721	1.7265	0.255525	1.79503	2.43046	2.25285	0.128145	1.96812	2.0828	0.0465099	0.0403147	0.487279	2.4043
GJB4	chr1:35225341-35229325	0	0.0138185	0	0.021081	0.0186482	0	0.017204	0.0632037	0.029866	0	0.118588	0.140877	0	0	0	0.115612
GJB3	chr1:35246789-35251967	0.188443	0	0.0828214	0.12735	0.156078	0.0346216	0.162431	0.482487	0.400587	0.028549	0.160486	0.213433	0	0	0.026218	0.955318
GJA4	chr1:35258598-35261348	0	0	0	0	0	0	0	0	0	0	0	0	0	0	0	0
AK2	chr1:33473540-33502512	2.10361	4.73017	2.02297	4.95216	2.90932	2.38363	3.14572	2.15992	2.00065	2.70218	2.77711	2.74677	2.81563	1.78387	3.36815	2.47798
DLGAP3	chr1:35331036-35370984	0	0.0322178	0	0	0	0	0	0	0	0	0.0452383	0	0	0	0	0
LOC653160	chr1:35441299-35444307	0	0	0	0	0	0	0.0365543	0	0	0.0399514	0	0	0.203947	0	0	0.0695151
ZMYM6NB	chr1:35447126-35450948	0.356121	0.141965	0.274799	0.261082	0.164379	0.316444	0.218907	0.542185	0.639836	2.2757	0.366553	0.461771	2.45256	2.26422	0.175532	0.258196
ZMYM6	chr1:35451766-35497569	0.140874	0.211145	0.125113	0.312385	0.174338	0.125878	0.182674	0.161149	0.109318	0.41574	0.160453	0.136559	0.433162	0.368197	0.202295	0.131321
ZMYM1	chr1:35544971-35581455	0.030841	0.0799714	0.0710553	0.0582164	0.0576513	0.0134704	0.0848245	0.0539719	0.0670041	0.206387	0.0567146	0.055251	0.0440397	0.0897124	0.151118	0.0225408
SFPQ	chr1:35649200-35658743	3.10102	8.0562	3.27001	5.96218	6.35419	4.78066	5.5018	3.78715	3.64797	5.30139	3.83784	3.86393	6.34229	4.67086	8.50499	3.82627
EPB41	chr1:29213602-29446558	1.01279	1.20477	0.661802	1.13172	0.84276	1.04756	1.09484	1.20402	1.06204	1.07413	1.08132	0.953944	1.66165	1.27212	1.72276	1.18961
TMEM200B	chr1:29445936-29450421	3.67814e-245	0	4.67609e-105	4.66038e-101	0	0	1.04009e-171	0	1.15816e-284	5.72175e-173	1.01891e-209	0	4.02245e-66	6.11367e-166	4.43089e-227	0
C1orf212	chr1:35315962-35325417	0.300145	0.495806	0.329515	0.386966	0.35931	0.354	0.375311	0.365519	0.292874	0.598648	0.313101	0.291001	0.740472	0.514492	0.379218	0.36482
KIAA0319L	chr1:35899090-36023037	2.10552	1.67351	1.69974	1.51903	1.72292	1.6299	1.36082	1.6427	1.4216	1.3796	2.01347	1.93775	1.27312	0.853606	1.89671	1.81555
TFAP2E	chr1:36038970-36060927	0.212501	0.0395237	0.0637455	0	0.144298	0.0706274	0.106611	0.262795	0.304574	0.117814	0.181969	0.0497551	0.0598898	0.080232	0.160096	0.152063
ZMYM4	chr1:35734567-35887545	0.430051	1.07074	0.452302	1.20418	0.574632	0.625895	0.996995	0.55675	0.520234	0.815347	0.628244	0.525867	0.709054	0.571287	1.28509	0.586164
C1orf216	chr1:36179476-36184790	0.197804	0.12066	0.194891	0.141885	0.195761	0.10739	0.0844633	0.167678	0.131402	0.327168	0.264556	0.0937976	0.609318	0.561648	0.137968	0.128484
CLSPN	chr1:36197712-36235551	0	0.0674531	0	0	0	0	0.00479996	0.0206403	0.00456336	0.0272947	0	0	0.0322561	0.0305924	0.0377266	0
NCDN	chr1:36023392-36032380	0.443205	0.801865	0.6583	1.03844	0.592048	0.70607	0.83309	0.534437	0.402477	0.745265	0.775783	0.661436	0.674175	0.496535	1.33299	0.401697
RBBP4	chr1:33116748-33151812	1.29943	2.9168	1.20806	2.06528	1.60415	1.43756	1.76623	1.18261	1.13545	1.63383	1.44726	1.19553	1.40535	1.31955	2.48792	1.23153
SYNC	chr1:33145506-33168361	0.663995	0.157652	0.311097	0.212603	0.214421	0.732849	0.0634748	0.51514	0.4482	0.0243911	0.537094	0.45856	1.70841e-49	1.02084e-53	0.24422	0.671485
EIF2C4	chr1:36273827-36323490	0.127225	0.109846	0.12733	0.209311	0.258274	0.199856	0.147511	0.189321	0.150801	1.14306	0.1001	0.141457	1.1056	1.09385	0.0904755	0.137855
TEKT2	chr1:36549675-36553876	0.0698038	0.0595065	0.0415316	0	0.158787	0.0331905	0	0.0454944	0.113082	0	0.0484653	0.0487787	0.0296086	0	0	0.0956987
ADPRHL2	chr1:36554452-36559533	1.47864	1.64807	1.48404	1.99897	1.48672	1.60721	1.35992	1.45913	1.36745	2.83736	1.21813	1.37451	3.46543	2.42003	1.30767	1.63274
COL8A2	chr1:36560843-36565850	0	0.040821	0	0.0261071	0.0120138	0	0.0216334	0	0	1.30227	0	0	1.11337	1.336	0	0
TRAPPC3	chr1:36602172-36615067	3.72651	6.63126	3.37484	5.41282	3.27373	3.21873	5.84395	3.70932	2.83748	3.52967	3.76179	3.09318	4.32439	2.47212	4.13776	2.66059
EIF2C3	chr1:36396682-36522063	0.146377	0.240311	0.0985113	0.18997	0.0814714	0.142937	0.20905	0.188789	0.126754	0.396461	0.120501	0.179883	0.308453	0.25514	0.350164	0.19663
EIF2C1	chr1:36348809-36389899	0.570953	0.46528	0.443959	0.873762	0.683665	0.643242	0.470949	0.614968	0.565248	0.778685	0.571371	0.472424	1.01109	0.834672	0.476175	0.530746
MAP7D1	chr1:36621802-36646441	1.05448	1.01131	0.560209	0.925124	0.489276	0.890843	1.01978	0.885304	0.45093	6.52206	0.75865	0.696015	7.38651	6.32846	1.18723	0.666309
FAM176B	chr1:36787631-36789755	7.85774	3.60243	5.78179	8.18307	7.14365	8.42612	7.52577	12.0124	9.14794	2.4523	9.67974	7.85274	3.75151	2.29228	4.62594	4.32294
PSMB2	chr1:36065142-36107445	2.05499	3.5241	1.94572	2.92283	3.17162	2.32056	3.01046	2.42554	2.30166	2.19889	2.12784	2.28598	3.18257	2.61221	3.17852	2.28114
LSM10	chr1:36859030-36863493	1.7069	2.38045	1.77652	2.8224	2.04124	2.77812	2.3286	2.45515	2.01419	2.46476	1.79967	2.6145	2.68537	1.48929	1.24345	1.97068
THRAP3	chr1:36690016-36770957	1.318	2.20597	1.23477	2.67674	1.51673	1.97826	1.88607	1.66516	1.24055	3.50749	1.23836	1.37432	3.1831	3.16658	2.40796	1.48636
MRPS15	chr1:36921361-36930040	5.75852	6.6139	4.40037	7.27584	5.49852	5.43047	5.21595	4.84356	4.97523	3.05356	4.64511	4.47473	4.27139	1.85664	5.26626	2.99381
SH3D21	chr1:36771993-36786948	0.506946	0.0993641	0.217066	0.371132	0.632954	0.271339	0.39047	0.478924	0.44187	1.59528	0.392664	0.382525	2.03432	1.75054	0.153301	0.271496
GRIK3	chr1:37261127-37499844	0	0	0	0	0	0	0	0	0	0	0	0	0.00565712	0	0	0
MIR4255	chr1:37627163-37627235	0	0	0	0	0	0	0	0	0	0	0	0	0	0	0	0
OSCP1	chr1:36883506-36916086	0.297089	0.191021	0.0685008	0.454368	0.267521	0.420834	0.270016	0.448518	0.298351	0.188107	0.239479	0.234503	0.220796	0.0268883	0.191594	0.26439
LOC728431	chr1:37920479-37940044	0.172107	0.384836	0.317143	0.433243	0.531892	0.242569	0.286886	0.202461	0.231026	0.714768	0.309233	0.553683	0.412842	0.381346	0.401547	0.421505
STK40	chr1:36805224-36851485	5.39785	4.09253	5.76289	5.18277	6.46976	5.81071	5.39021	6.28903	5.37474	4.25432	5.32118	5.70075	4.86326	3.78735	5.00972	5.72552
MEAF6	chr1:37958175-37980364	3.1353	1.60474	1.65246	1.57673	1.62026	2.45562	1.32113	2.1761	2.10094	2.06947	1.94337	2.28082	1.76514	1.70845	1.47083	2.30404
ZC3H12A	chr1:37940118-37949978	0.349952	0.0546077	0.133635	0.27112	0.059643	0.252361	0.142848	0.0835594	0.0805791	1.08903	0.107254	0.0509113	1.20941	2.24903	0.12613	0.052479
RSPO1	chr1:38076950-38100491	0	0.400651	0	0.739344	0	0	0.102671	0	0	0.0640177	0	0	0.19156	0.0149456	0.333551	0
SNIP1	chr1:38002141-38019903	0.162328	0.215785	0.167699	0.321138	0.187016	0.307223	0.100881	0.185434	0.129268	0.617649	0.275351	0.210911	0.625984	0.442977	0.229549	0.251217
DNALI1	chr1:38022519-38032458	0	0.0145355	0	0	0.0178583	0	0.0345398	0.047597	0	0	0.0336596	0.0325057	0	0	0	0
GNL2	chr1:38032412-38061586	1.18236	1.79662	0.826662	1.72663	1.23319	1.14953	1.47123	0.813899	0.525359	1.11929	0.881391	0.659489	1.712	1.52936	1.36411	1.05062
C1orf109	chr1:38147241-38156192	0.200109	0.337876	0.342136	0.31749	0.327368	0.729486	0.372026	0.392086	0.451104	0.354463	0.479533	0.586634	0.335354	0.25262	0.401793	0.517726
CDCA8	chr1:38158158-38175391	0.0749577	0.21357	0.0916053	0.135357	0	0.0236724	0.0360464	0.0338508	0.0164284	0.0590338	0.0352686	0.0696894	0.132266	0.0556263	0.268756	0.0708127
CSF3R	chr1:36931643-36948915	0.0175709	0.262482	0	0.160848	0	0	0.114384	0.0133244	0	5.68701	0.0561429	0.0119723	4.90976	4.42891	0	0
YRDC	chr1:38268613-38273865	0.445506	0.745055	0.326347	0.386043	0.242387	0.22604	0.750454	0.471071	0.40428	0.511946	0.42317	0.420456	0.745554	0.516541	0.55618	0.269686
C1orf122	chr1:38273472-38275126	11.5298	24.5678	10.9567	26.0255	14.5203	15.8568	21.5667	13.5546	11.2048	9.80793	10.6122	13.0582	11.553	7.31101	20.042	10.1681
MANEAL	chr1:38259773-38267278	0.175075	0.175173	0.137114	0.276678	0.200751	0	0.114539	0.161636	0.13991	0.119457	0.167735	0.245515	0.568581	0.45962	0.252493	0.121
EPHA10	chr1:38181645-38230824	0.0645796	0.0349085	0.0462542	0.0473735	0.105433	0.0916755	0.105262	0.0171797	0.0412502	0	0.10377	0.0628062	0.0731878	0	0.0376337	0.0274896
SF3A3	chr1:38422651-38455761	1.00691	2.13377	0.946955	1.99736	1.17886	1.17843	1.19626	1.49151	1.36364	1.73651	1.08513	0.855015	1.51277	1.16624	1.15706	1.17042
FHL3	chr1:38462441-38471234	1.00792	1.5145	0.648776	1.31859	1.01587	0.636379	0.940622	0.872904	0.621803	1.0241	0.920342	1.0117	0.939444	0.688299	1.04632	1.03175
INPP5B	chr1:38326368-38412729	0.0823635	0.276638	0.0683691	0.236956	0.0842875	0.0386389	0.123162	0.0470545	0.102167	0.807797	0.139224	0.154401	0.502433	0.811183	0.153208	0.127548
UTP11L	chr1:38478383-38490497	1.3979	2.41587	1.0439	2.74159	1.67641	1.41081	1.86881	1.04883	1.1976	1.56183	1.29875	0.808404	2.99928	1.76108	2.25605	1.23888
POU3F1	chr1:38509522-38512450	0	0	0	0	0	0	0	0	0	0	0	0	0.027031	0	0	0.0233101
MIR3659	chr1:38554902-38555001	0	0	0	0	0	0	0	0	0	0	0	0	0	0	0	0
LOC339442	chr1:38674705-38680439	0	0	0	0	0	0	0	0	0	0	0	0	0	0	0	0
RHBDL2	chr1:39351478-39407456	0	0.0206955	0.0204477	0	0.0501682	0.0597355	0	0.0439977	0.0433699	0.0252938	0.0235194	0.0704315	0.117438	0	0	0.116833
RRAGC	chr1:39305014-39325340	0.828097	0.922859	0.99692	1.18058	1.02478	1.7844	1.1407	1.1093	1.21845	2.52176	1.03582	1.09166	2.44064	2.16683	1.30118	1.27817
NDUFS5	chr1:39491966-39500308	10.2451	10.748	8.58707	14.4653	10.448	8.01005	10.0456	9.59624	8.34471	7.68558	9.29603	8.01189	11.4554	7.62924	8.55831	7.88945
AKIRIN1	chr1:39456915-39471737	1.70838	2.40456	1.81333	1.61842	1.72881	2.43176	2.99084	1.98931	1.56005	2.61204	1.72472	1.83791	2.09515	1.85272	2.0721	1.75664
MTF1	chr1:38275238-38325292	0.146431	0.220204	0.188547	0.225138	0.15055	0.175141	0.264436	0.162624	0.199137	0.54452	0.21867	0.16475	0.851347	0.724613	0.30867	0.18117
BMP8A	chr1:39957317-39995541	0.0876927	0.00942331	0.0075643	0	0	0.0121884	0	0.00844486	0	0.138518	0	0.0085254	0.106104	0.127832	0	0
PPIEL	chr1:39987951-40025370	0	0.0921392	0	0.0778325	0	0	0	0	0	0.472058	0	0.019858	0.541567	0.430928	0.0941659	0.0206362
HEYL	chr1:40089102-40105348	0	0.00908086	0	0	0	0	0	0	0	0.0247407	0	0	0	0.0231785	0	0
NT5C1A	chr1:40124792-40137710	0	0	0	0	0	0	0	0	0	0	0	0	0	0	0	0
HPCAL4	chr1:40144644-40157089	0	0	0	0	0	0	0	0	0	0	0	0	0	0	0	0
PABPC4	chr1:40026484-40042521	3.52689	8.97124	3.38885	8.60655	4.96404	2.73802	4.98482	3.32682	3.07025	13.6669	4.04439	3.71666	18.6127	17.4557	5.78317	3.13373
SNORA55	chr1:40033045-40033182	0	0	0	0	0	0	0	0	0	0	0	0	0	0	0	0
TRIT1	chr1:40306705-40349177	0.15701	0.314864	0.201149	0.265766	0.362537	0.240254	0.301413	0.200066	0.217486	0.453665	0.248836	0.24882	0.360608	0.27318	0.327043	0.173048
MYCL1	chr1:40361095-40367687	0	0.054847	0	0	0	0.0199925	0.0757699	0	0	0.237406	0	0	0.258066	0.262463	0.0157789	0.0146665
MFSD2A	chr1:40420783-40435628	0.439319	1.28689	0.208475	0.427755	0.294985	0.752147	1.12711	0.794664	1.00408	2.09166	0.927872	0.846484	1.45825	1.32299	1.8743	0.477509
CAP1	chr1:40506254-40538321	5.90003	15.5912	6.16158	11.7494	9.30675	8.42566	11.0294	9.63216	8.2725	23.5591	6.58378	6.87748	27.159	20.3163	11.0747	7.5963
MYCBP	chr1:39328161-39339050	1.20625	2.04548	1.25951	1.53872	1.78429	1.8465	1.62207	1.23076	1.19994	0.544967	1.13017	1.13572	0.560395	0.433939	1.43856	1.00164
GJA9-MYCBP	chr1:39328161-39347298	2.39534e-06	0.0186723	4.13478e-08	1.33975e-06	7.50034e-07	2.96376e-10	9.76504e-11	0.0189225	7.2151e-06	3.75067e-06	2.86978e-08	0.021012	3.36626e-06	0.0389112	2.23974e-06	0.166448
GJA9	chr1:39339738-39347298	0	1.25793e-08	0	0	0	0	0	1.02423e-06	0	0	0	4.30754e-19	0	6.71472e-06	0	0
PPT1	chr1:40538381-40563142	3.06341	3.85054	1.47449	2.60134	3.40547	2.62675	2.4803	2.2032	2.44213	15.2459	2.41052	2.53272	25.0779	19.753	1.55539	2.1841
TMCO2	chr1:40713572-40717365	0	0	0	0	0	0	0	0	0	0	0	0	0	0	0	0
ZMPSTE24	chr1:40723732-40759856	1.92851	1.57609	1.58501	0.931608	1.63888	2.29948	1.3071	1.71895	1.31595	1.77929	1.37493	1.6377	1.65258	1.30198	1.7327	1.5751
COL9A2	chr1:40766162-40782939	0	0.011324	0	0	0.0177018	0	0.0312737	0	0	0.434136	0	0	0.542185	0.512871	0.0151244	0.0150298
PPIE	chr1:40204516-40229586	0.711665	1.5743	1.09832	1.13146	0.913175	0.898778	0.859801	1.2041	0.612799	1.59296	1.08453	0.850529	1.66656	1.6977	1.00065	1.07279
BMP8B	chr1:40223902-40254533	0.0197389	0.0109766	0	0.0532432	0	0	0	0	0	0.0479248	0	0	0	0.0148588	0	0
OXCT2	chr1:40235196-40237020	0	0	0	0	0	0	0	0	0	0	0	0	0.0301473	0.027422	0	0
RLF	chr1:40627040-40706593	0.0736128	0.132354	0.0725796	0.103464	0.0629226	0.132096	0.12296	0.103025	0.0586367	0.316921	0.0819424	0.0398723	0.304891	0.314303	0.177153	0.114978
ZNF642	chr1:40943301-40962015	0	0	0	0	0	0	0	0.0171219	0.0168932	0.154229	0	0.0178528	0.114517	0.167097	0	0.018003
DEM1	chr1:40974432-40982214	0	0.137621	0.0832467	0.190589	0.180808	0.118929	0.0792576	0.0541199	0.229703	0.286389	0.0572816	0.112576	0.167015	0.196081	0.0639207	0.0756476
ZNF643	chr1:40916336-40929390	0.0273062	0.0364809	0.0348425	0.0742528	0.0205744	0	0.0417365	0.0187063	0.0185159	0.147077	0.0591978	0.0195996	0.0249627	0.0202909	0.204759	0.0197615
ZNF684	chr1:40997232-41013841	0.0568269	0.0407063	0.0185383	0	0.0214116	0.0752347	0.0220076	0.0393141	0	0.194298	0.0413464	0.0202495	0.159905	0.168869	0	0.0416968
SMAP2	chr1:40839377-40888998	0.605017	1.55468	0.581241	1.16421	1.00507	0.717754	0.894914	0.675783	0.779515	4.80992	1.03649	0.863047	5.78501	5.04768	1.65465	0.58812
KCNQ4	chr1:41249683-41306124	0.11515	0.119365	0.0589965	0.168439	0.0667785	0.182821	0.0812287	0.0555831	0.0642393	0.0683636	0.0839148	0.056784	0.0625999	0.062986	0.159285	0.118956
CITED4	chr1:41326727-41328018	6.34846	10.8831	3.97477	8.36469	8.88089	8.18804	10.5927	7.66111	6.2775	1.56142	4.73101	5.72127	2.40803	0.194786	10.1391	6.31187
RIMS3	chr1:41086351-41131324	0.0797909	0.605679	0.0820495	0.430781	0.133742	0.103223	0.275292	0.0671261	0.0700055	0.143031	0.0774213	0.0679805	0.196334	0.107447	0.499814	0.0253772
CTPS	chr1:41445006-41478235	0.256903	0.577461	0.222094	0.561343	0.246	0.185146	0.222821	0.298448	0.199973	0.32958	0.273262	0.250868	0.583648	0.25182	0.580056	0.126798
EDN2	chr1:41944445-41950344	0.100925	0	0	0.0451092	0	0	0.0366209	0.0666823	0	0	0	0.0356746	0	0.0372367	0	0
LOC100130557	chr1:41154751-41157933	0	0.0149019	0	0	0	0.0204521	7.6976e-223	0.0157557	0	0.0524136	0	0	0.0618064	0	0	0.0165958
NFYC	chr1:41157241-41237275	1.71536	2.62237	1.37821	2.14311	2.27612	2.86887	2.41179	2.14449	1.44676	2.37193	1.5413	1.52242	2.93101	2.67847	2.46383	2.04022
MIR30E	chr1:41220026-41220118	0	0	0	0	0	0	0	0	0	0	0	0	0	0	0	0
MIR30C1	chr1:41222955-41223044	0	0	0	0	0	0	0	0	0	0	0	0	0	0	0	0
GUCA2B	chr1:42619091-42621495	0	0	0	0	0	0	0	0	0	0	0	0	0	0	0	0
GUCA2A	chr1:42628361-42630395	0	0	0	0	0	0	0	0	0	0	0	0	0	0	0	0
HIVEP3	chr1:41975683-42501596	0.308265	0.396982	0.238167	0.234042	0.221954	0.50832	0.253112	0.391295	0.294098	0.309934	0.355759	0.276889	0.224663	0.255404	0.303273	0.179616
RIMKLA	chr1:42846467-42889900	0	0.0120301	0.00386375	0.00560709	0.0092977	0.0111021	0.0139911	0	0	0.00468907	0.00883524	0.0127014	0.00551281	0	0.010049	0
LOC100507178	chr1:41480261-41509562	0	0.0174157	0	0	0	0	0.0114743	0	0	0.0270538	0	0	0	0	0	0
SLFNL1	chr1:41481268-41487427	0	0	0	0	0	0.0338024	0	0	0	8.74719e-172	0	0	0	0	0	0
SCMH1	chr1:41492870-41707815	1.79868	1.26981	1.51251	1.33232	1.59858	1.79882	1.38876	1.14585	1.04475	0.481402	1.707	1.72095	0.419458	0.312216	1.29491	1.27414
ZMYND12	chr1:42896000-42921938	0.405866	0.201924	0.216625	0.30814	0.269893	0.209135	0.149918	0.100683	0.135106	0	0.247029	0.107357	0.151525	0.100493	0.163323	0.165308
PPCS	chr1:42922172-42926086	5.4002	9.26331	4.89256	5.90176	7.40837	5.63536	6.67233	5.66658	5.47799	4.19525	6.16078	4.91755	4.81782	4.19628	4.36702	6.37562
PPIH	chr1:43124047-43142429	0.763649	1.13443	0.924846	1.5175	1.11638	0.941377	0.471209	0.581768	0.399946	0.815961	0.885426	0.785161	0.62079	0.893824	0.638205	0.67882
CCDC30	chr1:43000559-43120335	0.0147689	0.0202314	0	0	0	0.0401164	0	0.0101619	0.0103865	0.0553952	0.0104314	0	0.0273951	0.031844	0	0.0211282
CLDN19	chr1:43198763-43205925	0	0	0	0	0	0	0	0	0	0	0	0	0	0	0	0
FOXJ3	chr1:42642209-42801548	1.1936	1.77959	1.23882	1.53789	1.45264	1.62644	2.25564	1.68066	1.372	1.34434	1.29379	1.20914	1.22423	0.898262	2.2375	1.49953
YBX1	chr1:43148065-43168020	34.931	58.0507	27.9942	52.4897	37.5662	35.0917	41.4455	28.1394	20.083	47.9759	33.2314	32.3708	66.636	52.6143	46.6382	31.4061
C1orf50	chr1:43232915-43241415	0.630788	0.486582	0.329777	0.570247	0.355473	0.635425	0.478518	0.42814	0.23265	0.694257	0.418757	0.571528	0.209198	0.344917	0.359647	0.406811
LOC100129924	chr1:43253660-43263901	0	0	0	0	0	0	0	0	0	0	0	0	0	0	0.0556074	0
ZNF691	chr1:43312243-43318146	0.336364	0.182664	0.124149	0.35436	0.252504	0.251124	0.318014	0.221604	0.210317	0.353903	0.242409	0.28877	0.36003	0.277476	0.100661	0.355312
LEPRE1	chr1:43212005-43232755	0.438213	0.39035	0.311206	0.507539	0.403037	0.428103	0.520669	0.417597	0.458452	0.829487	0.254037	0.38819	1.08872	0.685743	0.227326	0.329723
FAM183A	chr1:43613593-43622067	0	0.0736581	0	0.295686	0.0877561	0	0.084292	0	0	0	0.0816469	0	0	0	0.0876852	0
EBNA1BP2	chr1:43629844-43638241	1.92318	4.20538	1.61995	2.57264	2.10964	2.37732	2.37841	2.13701	1.52073	0.990196	1.79475	2.20206	1.2911	1.30598	2.89747	0.98453
WDR65	chr1:43638000-43676549	0	0	0	0	0	0	0	0	0	0	0.0151776	0	0	0	0	0
CCDC23	chr1:43272722-43283059	0.344007	0.636383	0.212485	0.18695	0.965114	0.559045	0.355134	0.36105	0.467549	1.28419	0.381346	0.53173	1.74125	1.45039	1.13882	0.61782
ERMAP	chr1:43282775-43310660	0.669749	0.52707	0.532774	0.892725	0.626901	0.770607	0.654675	0.555376	0.297421	0.818245	0.744623	0.629796	0.689974	0.51452	0.542723	0.463434
SLC2A1	chr1:43391045-43424847	3.16739	2.37464	2.80396	1.83321	2.28115	3.98721	2.89523	5.30032	5.76657	3.56709	3.8881	4.60151	2.62694	2.47363	3.33583	4.9516
FLJ32224	chr1:43424719-43449029	0.164536	0	0.0351253	0.050077	0.042127	0	0.211524	0.0377324	0.0373257	0.085387	0.11962	0.0796043	0	0	0.134415	0.0396307
TMEM125	chr1:43735664-43739673	3.74991	4.12033	3.88265	3.95381	3.4317	4.93376	3.0682	3.96293	3.69927	0.890402	4.5924	4.71397	0.411489	0.0669329	4.37582	3.69002
C1orf210	chr1:43747556-43751288	8.50441	12.0689	8.61794	11.7383	6.45912	9.73968	12.8433	7.47201	7.74937	2.90007	10.2381	8.55613	1.27667	0.270201	13.0059	7.32471
CDC20	chr1:43824625-43828873	0.31972	2.18566	0.174714	1.1493	0.111953	0.800664	1.8409	0.505031	0.470643	0.487363	0.387142	0.319036	0.843792	0.136374	3.08547	0.277877
ELOVL1	chr1:43829071-43833699	19.3765	13.6159	12.1546	11.0421	12.697	16.1044	14.1699	19.5969	17.458	6.57962	15.8364	18.6222	5.99861	5.53329	17.1658	13.723
TIE1	chr1:43766663-43788779	0.3401	0.392043	0.343837	0.374043	0.405719	0.374029	0.515725	0.568538	0.376112	0.138783	0.6095	0.644753	0.0721916	0	0.66057	0.511094
MPL	chr1:43803474-43820135	0.125109	0.0939011	0.0322355	0.0325886	0.0137168	0.085187	0.0509147	0.0120252	0.0117376	0	0.0755792	0.060043	0.0153576	0	0.093291	0.0124626
MED8	chr1:43849587-43855483	1.6074	2.41295	1.40316	2.53789	1.01167	1.77888	1.94158	1.50231	1.21949	1.87231	1.35384	1.20229	2.22008	1.36299	2.45101	1.34377
KDM4A	chr1:44115796-44171189	0.495488	1.22896	0.541343	1.32443	0.653642	0.680481	1.08262	0.712655	0.691649	0.747558	0.685955	0.703222	0.706278	0.606966	1.43816	0.458965
LOC100132774	chr1:44165408-44173012	0.0353327	0.0230317	1.80664e-12	0	0.0273418	4.03802e-11	1.98678e-10	0.0242993	1.92669e-12	6.90604e-13	0	5.3969e-11	0.123508	5.82751e-12	6.70405e-10	1.11858e-10
ST3GAL3	chr1:44173217-44396831	0.733599	0.590165	0.442639	1.08688	0.681761	0.698728	0.286238	0.61682	0.227414	0.948476	0.598433	0.594277	1.16683	0.594945	0.849425	0.8607
ARTN	chr1:44398991-44402912	0.308176	0.135593	0.150348	0.213951	0.161781	0.321131	0.0349028	0.17223	0.128914	0	0.224386	0.177766	0	0	0.0344383	0.350309
IPO13	chr1:44412477-44433694	1.17958	1.89275	1.10635	1.57179	1.25994	1.46115	1.29022	1.33591	1.14834	1.61809	1.80369	1.43543	1.46974	1.35122	1.34851	1.07141
DPH2	chr1:44435652-44439043	0.724254	1.31223	0.766805	1.25177	0.785332	0.749415	0.911143	0.758955	0.49425	0.843819	0.495876	0.601419	1.07019	0.981637	1.28689	0.678034
PTPRF	chr1:43996546-44089343	9.23693	3.48241	7.57313	3.04309	8.32579	7.90006	3.65345	6.40994	6.67732	0.66598	9.70304	9.68838	0.445285	0.145977	4.10492	7.85408
ATP6V0B	chr1:44440601-44443972	5.84252	5.67421	4.69758	4.83372	4.51464	6.25846	3.95086	5.80759	4.72746	17.8019	5.58615	5.67396	18.5457	17.3773	3.57586	6.2208
B4GALT2	chr1:44444865-44456840	4.9404	4.49042	3.54265	3.86237	3.88382	4.19853	2.10748	2.69316	2.70701	1.16977	4.37335	3.4465	1.22228	0.684982	4.56769	3.66279
KLF17	chr1:44584521-44600809	0	0	0	0	0	0	0	0	0	0	0	0	0	0	0	0
DMAP1	chr1:44679124-44686351	1.27313	1.32961	0.698934	1.50511	0.937368	0.739578	0.746627	0.773004	0.639861	0.971796	1.00814	0.930753	1.23222	0.683689	1.22263	0.992421
ERI3	chr1:44686741-44820939	4.12789	4.47866	2.81618	6.05416	4.67808	4.60565	3.86911	4.48647	3.28076	2.25803	3.77995	4.3581	3.2068	2.12292	4.449	4.27996
RNF220	chr1:44870959-45117396	0.645859	0.788049	0.818434	0.862452	1.0527	1.03656	0.717099	0.951442	0.662744	1.73588	1.21051	0.993381	1.89526	1.34314	0.955422	0.609074
CCDC24	chr1:44457279-44462198	0.745019	0.249596	0.116474	0.345935	0.367243	0.388273	0.0770732	0.253759	0.158204	0.310265	0.338588	0.173097	0.187319	0.225067	0.170079	0.142757
SLC6A9	chr1:44462154-44497134	0.124761	0.30893	0.0957572	0.117023	0.142886	0.0266486	0.0832987	0.0868815	0.0852221	0.0856243	0.0379229	0.0551063	0	0.0419664	0.363844	0.0590012
C1orf228	chr1:45140393-45191263	0	0	0	0	0	0	0.0276625	0	0	0.0901627	0	0	0.296202	0.112195	0	0
TMEM53	chr1:45119500-45140099	0.292975	0.322427	0.330105	0.225565	0.272355	0.472084	0.255282	0.432013	0.29474	0.983176	0.392635	0.367458	1.56508	0.817878	0.150108	0.209683
KIF2C	chr1:45205489-45233438	0.0397918	0.0607122	0.0121444	0.0181366	0	0	0	0.0134421	0.0132472	0.0622751	0.0423432	0	0.0528025	0.0147018	0.0309811	0.013946
BEST4	chr1:45249256-45253426	0	0	0	0	0	0	0	0	0	0	0	0	0	0.0257356	0	0
RPS8	chr1:45241245-45244412	115.486	304.469	79.2865	250.457	104.374	74.6773	176.442	83.4761	69.5831	73.413	76.4439	78.615	115.469	61.6287	221.979	70.5551
SNORD55	chr1:45241536-45241610	0	0	0	0	0	0	0	0	0	0	0	0	0	0	0	0
SNORD46	chr1:45242163-45242261	0	0	0	0	0	0	0	0	0	0	0	0	0	0	0	0
SNORD38A	chr1:45243513-45243584	0	0	0	0	0	0	0	0	0	0	0	0	0	0	0	0
SNORD38B	chr1:45244061-45244130	0	0	0	0	0	0	0	0	0	0	0	0	0	0	0	0
BTBD19	chr1:45274153-45279801	0.323377	0.202251	0.0316729	0.0490674	0	0.053976	0.195082	0.142574	0.0354092	0.917531	0.0383788	0	0.57755	0.809587	0.116454	0.0376735
PLK3	chr1:45266035-45271667	1.48646	0.619486	0.76756	0.885517	0.427709	0.866469	0.601422	1.10683	0.947669	2.80122	0.15059	0.268269	3.09366	3.15928	0.62055	1.16317
TCTEX1D4	chr1:45271585-45272957	0.19692	0.0681174	0.226423	0.175045	0.156824	0	0.275986	0.0839707	0.0816605	0.377085	0	0.043647	0.368523	0.482643	0	0.0453431
EIF2B3	chr1:45316193-45452361	1.00507	2.25763	1.54157	3.10005	1.61056	1.94072	2.40952	2.23371	1.97634	1.2198	1.65701	1.27173	1.46429	0.837785	2.46046	1.74983
HECTD3	chr1:45468219-45477027	2.51915	2.01658	1.52932	2.69546	1.80469	2.42514	2.20134	2.40044	1.6838	2.36124	2.0111	2.15395	2.58805	1.92852	2.07585	2.19121
PTCH2	chr1:45285515-45308616	0.0774064	0.0476569	0.0511996	0.0932441	0.0153074	0.0194206	0	0.058107	0.055444	0.113297	0.0550365	0.0586566	0.0650355	0	0.012254	0.0606738
UROD	chr1:45477804-45481341	2.81979	3.59689	1.93745	3.47664	3.21058	3.73554	2.62804	2.42889	3.00419	2.88797	3.03316	2.19916	3.67387	2.21722	2.58161	2.12484
LOC400752	chr1:45769581-45771291	0	0.0224941	0.0233563	0	0	0	0.0564522	0.0256727	0.025387	0	0.0275561	0.0533723	0.0333671	0	0.0294695	0.0816221
HPDL	chr1:45792544-45794346	0	0	0.0236188	0.0360944	0	0	0	0	0.0252443	0	0	0	0	0	0	0
ZSWIM5	chr1:45482075-45672250	0.0230645	0.0423438	0.0284049	0.0952043	0.0267839	0.0327474	0.0928952	0.0158069	0.0152765	0	0.00831691	0.0156786	0	0	0.0353492	0
MUTYH	chr1:45794913-45806142	0.190741	0.312644	0.171001	0.167384	0.360014	0.101503	0.108642	0.229034	0.150918	0.461937	0.102927	0.282523	0.709446	0.417538	0.186827	0.158891
TESK2	chr1:45809554-45956840	0.454481	0.65175	0.454603	0.57413	0.618642	0.853243	0.852824	0.499115	0.348008	1.51729	0.625301	0.455435	0.98116	0.926402	0.675912	0.552656
TOE1	chr1:45805341-45809650	0.160587	0.257216	0.145026	0.218085	0.0416232	0.154992	0.155836	0.230678	0.156306	0.273777	0.135131	0.0928783	0.341421	0.354462	0.140632	0.131508
CCDC163P	chr1:45959597-45965751	0.0339815	0.408858	0.254808	0.140782	0.193481	0.0300394	0.259666	0.168695	0.102885	0.109226	0.132804	0	0.160431	0.137485	0.549928	0.0247491
MMACHC	chr1:45965855-45976739	0.536501	1.22565	0.628935	0.883902	0.843491	0.592437	0.845622	0.637543	0.46425	0.283652	0.522784	0.60117	0.35661	0.0335877	1.3006	0.548113
PRDX1	chr1:45976706-45988562	13.5885	18.7573	9.65393	17.9837	13.0483	13.8823	12.5165	12.8629	10.7008	32.1336	12.1274	11.8851	40.8971	33.5431	15.2361	10.4085
AKR1A1	chr1:46016454-46035723	14.539	18.8304	12.0836	26.431	17.2724	17.7069	18.1308	19.0129	14.7267	11.0243	15.6516	15.1593	14.1572	11.7779	17.3093	15.2255
CCDC17	chr1:46085715-46089731	0	0	0	0	0	0.0284807	0.0207381	0	0	0.122366	0	0.0199583	0.0237858	0.0849435	0	0.0802625
MACF1	chr1:39547088-39952810	0.0734886	0.0689706	0.0666848	0.140888	0.0528721	0.0844178	0.0560269	0.0393976	0.040656	0.873218	0.0781868	0.0679302	0.828282	0.831807	0.0757143	0.0716174
KIAA0754	chr1:39875175-39882154	0	0.0540633	0.0318278	0.0307457	0.0130595	0.0159801	0.0256117	0.0294682	0.00572136	0.0400493	0.0428052	0.0177762	0.0382074	0.0510281	0.0473316	0.0303896
GPBP1L1	chr1:46092975-46152302	2.59811	3.63503	2.18997	3.96796	2.93353	3.27589	4.43435	2.87671	2.55382	3.3537	2.79446	3.48806	2.88554	2.74737	3.96126	3.29069
RPS15AP10	chr1:46111451-46112357	0.0686045	0	0	0	0	0	0	0	0	0.0528811	0	0	0	0.0500083	0	0
NASP	chr1:46049659-46084578	0.945271	1.24232	0.885192	1.09034	0.983686	1.48958	0.9429	1.01388	1.15445	0.905974	1.00076	0.871895	0.578012	0.721074	1.07332	1.13364
TMEM69	chr1:46153846-46160108	0.412746	1.16407	0.612682	0.801947	0.649086	0.750883	0.663301	0.686401	0.529369	1.80256	0.853147	0.855086	1.30106	1.09221	0.511642	0.845123
IPP	chr1:46159997-46216485	0.19363	0.499252	0.387647	0.43673	0.305895	0.490382	0.469628	0.500032	0.456571	0.0917943	0.281108	0.302931	0.158457	0.133551	0.541471	0.334235
TSPAN1	chr1:46640748-46651634	0.249759	0.236106	0.395063	0.569841	0.654572	0.313668	0.125365	0.372943	0.49735	0	0.36472	0.318763	0.0371966	0	0.166834	0.0895153
MAST2	chr1:46269284-46501796	0.705053	0.645589	0.532804	0.509012	0.729809	0.854005	0.697828	1.00084	0.71624	1.46788	0.464725	0.591533	1.63652	1.0799	1.14723	0.450671
C1orf84	chr1:43855555-43872565	7.1827e-22	0	1.52711e-10	0	0	0	1.5975e-26	0.114465	3.3591e-150	0.145102	0.0571058	0.058299	0	0.2032	0.0596411	0.0371908
SZT2	chr1:43855555-43919918	0.215753	0.329886	0.220382	0.2785	0.215438	0.257335	0.488459	0.277503	0.282943	0.425826	0.274712	0.249821	0.394304	0.380823	0.786534	0.127055
HYI	chr1:43916823-43919660	0.268498	0.609885	0.257025	0.639632	0.618936	0.345479	0.197938	0.55526	0.526914	1.35297	0.143343	0.311221	1.11098	0.459525	0.437827	0.315585
RAD54L	chr1:46713366-46744145	0	0.0787679	0	0.0911032	0	0	0.0315222	0.0170493	0.0831082	0.0506248	0.0182473	0.0177294	0.0442432	0.0188865	0.102459	0.0178037
LRRC41	chr1:46744071-46769038	3.28426	5.40469	3.33442	5.04475	4.55099	4.14648	4.41354	3.51575	3.23059	3.27608	3.5763	3.17984	3.74025	2.1786	6.78444	2.52772
UQCRH	chr1:46769379-46782447	22.4531	66.2135	26.5685	61.4902	29.9864	28.7169	44.969	25.3168	21.6679	19.1466	19.2249	19.7644	27.7533	14.1027	38.0771	20.7593
FAAH	chr1:46859938-46879520	0.323135	0.167046	0.234615	0.319427	0.235667	0.449722	0.0950349	0.349902	0.266727	0.134095	0.0937335	0.111718	0.138419	0.174565	0.0713412	0.229357
DMBX1	chr1:46972667-46979886	0	0	0	0	0	0	0	0	0	0.0801083	0	0	0	0.0187956	0	0
POMGNT1	chr1:46654352-46685977	1.73446	1.64113	1.75176	1.64261	1.81011	1.44549	1.4953	1.64922	1.38289	1.1202	2.07127	2.06616	1.79228	0.997069	1.99273	1.06587
C1orf190	chr1:46669005-46686928	0.745288	0.83518	0.690891	0.729505	0.758519	0.785911	0.923637	1.15836	0.829062	0.151709	0.783159	0.895174	2.16705e-14	0	1.04838	0.45329
NSUN4	chr1:46806389-46830690	0.455602	0.832298	0.518073	0.877537	0.462328	0.544032	0.571013	0.508297	0.441998	0.648017	0.394784	0.429794	0.469394	0.48875	0.594114	0.504742
MOBKL2C	chr1:47073386-47082563	0.550154	0.43214	0.566814	0.310573	0.35365	0.770609	0.856882	0.677148	0.799076	1.64087	0.586949	0.666405	1.54534	1.66494	0.40669	0.617879
ATPAF1-AS1	chr1:47137499-47139251	0	0	0	0	0	0	0	0	0	0	0	0	0	0	0	0
PIK3R3	chr1:46505811-46598708	0.755113	1.61881	1.04658	1.53984	1.05598	2.24377	1.57115	1.24338	1.02563	0.278061	1.50005	1.2501	0.353803	0.108665	3.34728	0.770503
CYP4B1	chr1:47264669-47285021	0	0	0	0	0.0976698	0	0	0	0	0	0	0	0	0	0.0238275	0.0220775
CYP4Z2P	chr1:47323905-47366147	0	0	0	0	0	0	0	0	0	0	0	0	0	0	0	0
CYP4A11	chr1:47394845-47407156	0	0	0	0	0	0	0	0	0	0	0	0	0	0	0	0
CYP4X1	chr1:47489239-47516423	0	0	0	0	0	0	0	0	0	0	0	0	0	0	0	0
CYP4Z1	chr1:47533159-47583992	0	0	0	0	0	0	0	0	0	0	0	0	0	0	0	0
CYP4A22	chr1:47603106-47614526	0	0	0	0	0	0	0	0	0	0	0	0	0	0	0	0
ATPAF1	chr1:47098410-47134099	0.908437	1.38204	0.757113	1.08273	1.19661	1.26063	1.30238	0.90524	0.719901	0.569548	1.00496	0.864789	0.588534	0.419763	0.930674	1.16101
TAL1	chr1:47681962-47695443	0	0	0	0	0	0	0	0	0	0	0	0	0	0	0	0
PDZK1IP1	chr1:47649260-47655771	18.0915	13.5201	13.0325	9.47074	19.098	26.3368	10.6632	17.1909	13.818	1.96537	19.1176	16.5217	1.08253	0.220745	10.5429	17.2785
LOC100130197	chr1:47139707-47157769	0	0	0	0	0	0	0	0	0	0	0	0	0.132128	0	0	0
KIAA0494	chr1:47140830-47184736	1.45517	1.54331	1.30563	1.65798	1.81421	1.93733	1.58233	1.78731	1.39396	2.22332	1.53701	1.47275	2.43636	2.07261	1.40233	2.01863
FOXE3	chr1:47881743-47883724	0	0	0	0	0	0	0	0	0	0	0	0	0	0	0	0
MGC12982	chr1:47897806-47900313	0	0	0	0	0	0	0	0	0	0.119522	0	0	0.0505233	0.0881473	0	0
FOXD2	chr1:47901688-47906363	0	0	0	0	0	0	0	0	0	0.0153371	0	0	0.0150461	0.0139558	0	0.0130396
LOC388630	chr1:48226199-48462562	0	0	0	0	0	0	0	0	0	0	0	0	0	0	0	0
SKINTL	chr1:48567386-48648100	0	0	0	0	0	0	0	0	0	0	0	0	0	0	0	0
SLC5A9	chr1:48688356-48714316	0	0	0.0487672	0	0.071082	0.0765944	0.0147614	0.0839282	0.0131323	0	0	0	0	0	0	0.0141
CMPK1	chr1:47799468-47844511	10.9381	14.5564	9.86968	10.6678	15.1074	15.5307	13.3815	9.9655	7.98088	5.76299	12.3119	10.94	4.83713	3.84844	12.8671	13.26
SPATA6	chr1:48761043-48937876	0.119431	0.0472103	0.113065	0.0248379	0.162052	0.0711659	0.0623145	0.177204	0.172349	0.050676	0.188142	0.113948	0.0990278	0.15791	0.0571945	0.155658
AGBL4	chr1:48998526-50489626	0	0	0.013301	0	0	0	0	0	0.0285293	0	0	0.029869	0	0	0	0
BEND5	chr1:49193539-49242547	0.0443488	0.0793496	0.0554024	0.241144	0.207634	0.21526	0.199161	0.120269	0.0303747	0.0720102	0.0970481	0.129429	0.0782875	0	0	0.031825
ELAVL4	chr1:50513685-50667540	0	0	0	0	0	0	0	0	0	0	0	0	0.116845	0.090384	0	0
DMRTA2	chr1:50883222-50889119	0	0	0	0	0	0	0	0	0	0	0	0	0	0	0	0
FAF1	chr1:50906934-51425936	2.2964	4.39745	2.66051	5.73683	3.86227	3.41159	3.62571	3.11013	2.48436	2.61921	2.66892	2.74726	2.75528	2.01845	4.43806	3.2597
C1orf185	chr1:51567905-51613754	0	0	0	0	0	0	0	0	0	0	0	0	0	0	0	0
CDKN2C	chr1:51434366-51440309	0.142823	0.258253	0.112283	0.200738	0.150332	0.104112	0.210582	0.156201	0.164338	0.315482	0.159179	0.200297	0.271942	0.118037	0.287607	0.158167
STIL	chr1:47715810-47779819	0.0847843	0.115147	0.0844808	0.243663	0.0556716	0.172258	0.128283	0.0985881	0.0830196	0.0565262	0.0705751	0.0517237	0.0491382	0.039173	0.141281	0.0777695
RNF11	chr1:51701944-51739119	2.96681	3.15441	3.24984	2.39454	3.8773	4.42259	3.59595	3.13312	2.59651	2.20951	3.48333	2.63227	1.79272	2.0212	3.85175	3.50963
TTC39A	chr1:51752929-51810785	0.311883	0.25265	0.37738	0.346409	0.322945	0.799	0.833042	0.911653	0.710697	0.0914496	0.318796	0.373101	0.103564	0.0164542	0.64839	0.405426
LOC100507423	chr1:47004367-47035927	1.73622e-260	0	0	0.0230107	0	0	0	0	0	0	0	0	0.0445462	0	0	0
MKNK1	chr1:47023089-47069966	1.1786	1.29737	0.523635	1.11548	1.30544	0.821998	1.01003	1.08726	0.707225	2.60016	0.801378	0.851479	2.13794	1.88489	1.35806	0.706285
KNCN	chr1:47011315-47016887	0	0	0	0	0	0	0	0	0	0	0	0	0	0	0	0
TXNDC12	chr1:52485803-52521047	1.30801	1.16296	1.03616	0.717515	1.66656	1.40683	1.17059	1.13473	0.865502	3.71053	1.67953	1.26627	3.40606	2.53556	0.84753	1.61581
KTI12	chr1:52497776-52499472	0	0.0945302	0	0.0368437	0.130183	0.0789641	0.0608204	0.0545242	0.0817434	0.357481	0.0295518	0	0.419892	0.402622	0.0310942	0.115644
BTF3L4	chr1:52521856-52554090	1.27707	1.8374	0.988896	1.5329	1.5666	1.21838	1.64455	0.835813	0.888847	1.70223	1.29205	0.834349	1.48193	1.77054	1.50085	1.19083
EPS15	chr1:51819934-51984995	0.57672	1.09051	0.676795	1.11704	0.826568	1.09324	1.05041	0.708429	0.751857	1.46414	0.61346	0.697624	1.3308	1.1686	1.15848	0.882916
CC2D1B	chr1:52816264-52831877	0.697696	0.69087	0.445554	0.689614	0.561166	0.767674	0.726558	0.511158	0.562182	0.767074	0.776857	0.596315	1.04665	0.896042	0.667334	0.513611
ORC1	chr1:52838500-52870143	0.0703263	0.0765924	0.0107451	0.10088	0.0537607	0.0167353	0.051329	0.0118787	0	0.0619994	0.0124712	0	0.0155752	0.0519684	0.0862401	0.0495256
PRPF38A	chr1:52870218-52883992	0.336156	1.08408	0.368648	0.702626	0.440663	0.406449	0.962563	0.463089	0.500827	0.558599	0.514458	0.337292	0.487539	0.455364	0.757152	0.261613
ZFYVE9	chr1:52608045-52812358	0.454151	0.558008	0.535249	0.798351	0.81008	0.763572	0.647127	0.73164	0.490656	0.119697	0.616538	0.685464	0.0718892	0.037219	0.670654	1.00513
GPX7	chr1:53068042-53074723	0.57282	0.556365	0.0329801	0.757824	1.00066	0.431373	0.392278	0.386208	0.20922	0.285449	0.451123	0.553704	0.184673	0.115394	0.0818215	0.258969
FAM159A	chr1:53099065-53122737	0	0	0	0	0	0	0	0	0	0	0	0	0	0	0	0
SELRC1	chr1:53152013-53164038	0.505108	0.907528	0.36168	0.569859	0.184554	0.668995	0.690296	0.429693	0.381664	0.728212	0.241849	0.190274	0.8178	0.521336	0.881238	0.412172
RAB3B	chr1:52373627-52456436	0.0487411	0.0608715	0.10974	0.130977	0.15592	0.120596	0.079009	0.0719814	0.11054	0.153808	0.101731	0.104723	0.169051	0.155197	0.0390762	0.148004
ZYG11A	chr1:53308182-53360247	0	0.0101129	0	0.0143119	0	0	0	0	0	0	0	0	0	0	0	0
ECHDC2	chr1:53361581-53387446	2.9515	1.59819	1.84078	2.4176	2.81034	3.1144	2.27524	2.17313	1.52862	0.879762	2.38431	2.8645	0.875529	0.343395	2.16653	2.54652
ZCCHC11	chr1:52888947-53018762	0.130697	0.160428	0.141004	0.17661	0.17995	0.182976	0.240659	0.124979	0.127064	0.280806	0.174398	0.183875	0.35213	0.192684	0.206266	0.216494
PODN	chr1:53527723-53551174	0	0	0.0688075	0	0	0.100942	0.0157282	0	0.0641667	0	0.070621	0.0660123	0	0	0.0998911	0.36831
SLC1A7	chr1:53552854-53608289	0	0	0	0	0	0	0	0	0	0.0216692	0	0	0	0.020306	0	0
ZYG11B	chr1:53192130-53293013	0.228284	0.681541	0.297883	0.542594	0.285955	0.575898	0.725322	0.376269	0.411893	0.878499	0.429023	0.385016	0.675545	0.799491	0.61887	0.358397
CPT2	chr1:53662100-53679869	0.956279	2.24169	1.32066	2.12473	1.35018	1.76794	1.8998	1.55866	1.59207	1.54684	1.33441	1.39654	1.65648	1.34824	1.65916	1.37499
C1orf123	chr1:53679771-53686289	1.20392	2.49249	1.10616	1.96114	1.97659	1.41167	1.37292	1.45029	1.23288	1.36534	1.19778	1.30761	1.75965	0.932152	1.5591	1.12802
FLJ40434	chr1:53904042-53905693	0	0	0	0	0	0	0	0	0	0	0	0	0	0	0	0
DMRTB1	chr1:53925071-53933158	0	0	0	0	0	0	0	0	0	0	0	0	0	0	0	0
GLIS1	chr1:53971905-54199877	0	0	0	0	0	0	0	0	0	0	0	0	0	0.0203946	0	0
TMEM48	chr1:54231133-54304225	0.199715	0.268432	0.200697	0.261046	0.292032	0.203053	0.196147	0.163327	0.203414	0.333991	0.205923	0.172539	0.403216	0.333136	0.150499	0.290726
YIPF1	chr1:54317391-54355487	0.942324	1.07465	0.733057	0.945278	1.26059	1.03278	0.992534	1.19325	0.905971	1.08645	1.00209	1.04729	1.46313	1.17684	0.777357	0.864875
DIO1	chr1:54359860-54376759	0.257197	0.101035	0.100714	0.0329292	0.105467	0.145007	0.112873	0.169864	0.106076	0.0275493	0.139927	0.0988211	0	0.0263532	0.180063	0.116451
HSPB11	chr1:54387233-54411288	1.10045	2.97112	1.48563	2.81365	2.89004	3.37265	2.9199	2.41519	2.3417	2.29683	2.1699	1.93943	1.85008	1.21262	3.35916	2.48394
LRRC42	chr1:54412036-54433839	0.528908	0.87265	0.556015	0.879605	0.660369	0.80802	0.86845	0.698661	0.686243	0.361103	0.428403	0.492888	0.561162	0.678029	0.642537	0.734319
LDLRAD1	chr1:54474505-54483803	0	0	0	0.0750811	0	0	0	0	0	0	0	0	0	0	0	0
SCP2	chr1:53392900-53517289	22.4102	14.4931	16.3585	17.9016	26.2852	27.5468	18.1958	19.7433	15.2054	7.64178	16.2835	15.9153	5.96319	4.53221	19.0192	23.7102
TCEANC2	chr1:54519273-54565416	0	0.0816129	0.0097617	0.085149	0.0823974	0.097764	0.0713289	0.115581	0.0946091	0.153634	0.0223508	0.0436656	0.195118	0.181007	0.0641226	0.143756
MIR4781	chr1:54519751-54519827	0	0	0	0	0	0	0	0	0	0	0	0	0	0	0	0
CDCP2	chr1:54604667-54619443	0	0	0	0	0	0	0	0	0	0	0	0	0	0	0	0
TMEM59	chr1:54497348-54519111	15.7532	7.54096	12.9258	7.24491	13.4049	15.1853	8.0039	12.7126	12.8889	8.88028	16.6428	15.996	8.01712	7.48512	6.04555	15.4493
MRPL37	chr1:54665839-54684056	3.85372	5.4446	2.7769	5.51162	4.67404	3.20058	3.56987	3.73192	3.12692	2.08985	3.07636	3.53456	3.1078	1.67794	4.86541	2.65975
CYB5RL	chr1:54638026-54665746	0.017191	0.124228	0.042416	0.0312277	0.013481	0.0163637	0.0256256	0.0348655	0.0456024	0.109162	0.0747068	0.0243026	0.0604508	0.115183	0.0805193	0.0244109
SSBP3	chr1:54692194-54872092	0.826475	1.48452	1.37558	1.5654	1.17752	1.17736	1.71209	0.713253	0.672466	1.62577	1.34966	1.48129	1.48668	1.16027	1.28597	0.68178
ACOT11	chr1:55013806-55100417	1.62771	0.324911	0.878862	0.475245	0.86557	1.51256	0.855948	1.97535	1.76799	0.31593	1.55068	1.7847	0.312521	0.36146	0.758663	2.0876
FAM151A	chr1:55074849-55089200	2.67474e-42	0.0197222	1.71969e-27	1.66949e-20	3.46457e-07	3.9006e-50	4.1159e-133	4.53187e-57	2.0917e-22	2.18845e-09	2.27666e-21	3.97541e-149	4.9578e-45	3.07786e-08	7.94891e-41	4.16955e-18
PARS2	chr1:55222570-55230226	0.0830971	0.218285	0.0510074	0.174207	0.0215128	0.157825	0.164202	0.149667	0.0542411	0.110039	0.0996886	0.0957822	0.0242723	0.228986	0.0426306	0.0589135
TTC22	chr1:55246751-55266941	0	0.422098	0.115701	0.314467	0.159337	0.174756	0.284928	0.176078	0.243035	0.141282	0.168166	0.117053	0.121812	0	0.469403	0.139584
C1orf177	chr1:55271735-55307937	0	0.0192899	0	0	0	0	0	0	0	0	0	0.023665	0	0	0	0
DHCR24	chr1:55315299-55352921	5.6291	1.00648	7.60082	1.08617	5.07091	8.24963	0.748127	6.38647	5.92035	1.18545	9.78345	9.53335	1.32887	1.13763	1.0877	9.59803
TMEM61	chr1:55446464-55457966	0.192475	0.0715247	0.0772663	0	0.153226	0.324981	0.139428	0.25896	0.340059	0	0.183577	0.262533	0	0	0.234767	0.136122
BSND	chr1:55464616-55474465	0	0	0	0	0	0	0	0	0	0	0	0	0	0	0	0
PCSK9	chr1:55505148-55530526	0	0	0	0	0	0	0	0	0	0	0.0136619	0	0	0	0.0275298	0
OSBPL9	chr1:52082545-52254891	2.23296	2.71522	1.6022	2.83372	2.55767	2.92323	3.4112	2.47475	1.95798	1.93333	2.21488	2.0761	1.29514	1.43293	2.9423	3.08438
NRD1	chr1:52254865-52344609	1.51605	3.11533	2.28808	3.88024	3.14758	2.71052	2.75594	3.03333	2.34171	2.44106	2.34168	2.39877	2.99292	2.19408	3.12644	2.75219
MIR761	chr1:52302015-52302074	0	0	0	0	0	0	0	0	0	0	0	0	0	0	0	0
LOC100507634	chr1:55681080-55683128	0	0.0711857	0	0.0702214	0	0	0.0839914	0	0	0.0285655	0	0.02553	0.0655322	0	0.0301513	0
PPAP2B	chr1:56960418-57045257	2.31123	2.68129	1.17596	1.87575	1.30356	2.61546	2.77518	1.96222	1.96685	8.20323	2.43359	2.405	13.5966	14.0489	1.61453	2.50702
MAGOH	chr1:53692563-53704282	1.08985	1.44553	0.951902	1.60692	1.48529	1.11874	1.20234	1.33042	0.561683	1.44345	1.25197	0.549219	1.32729	1.49606	1.29895	0.708803
LRP8	chr1:53708040-53793821	0.0786451	0.188249	0.118061	0.220637	0.23276	0.111708	0.37201	0.261487	0.153145	0.176962	0.129886	0.155985	0.158724	0.0826707	0.277893	0.102242
LOC100507564	chr1:53704281-53708455	0.112414	3.97889e-201	0	0.101558	0.233225	9.98103e-175	0	0.0372756	0	0	0.0815422	1.30161e-157	0.0499354	0.0417949	0.057493	0.0107996
USP24	chr1:55532031-55681039	0.334135	0.624526	0.434924	0.652077	0.567916	0.617353	0.780071	0.647844	0.598216	0.657266	0.468173	0.520339	0.780886	0.605274	1.24841	0.644477
C1orf168	chr1:57184476-57285369	0.0787346	0.0519903	0.109609	0.0730394	0.129503	0.129215	0.167375	0.0759082	0.0986618	0	0.157565	0.100913	0.014463	0	0.025967	0.0790636
C8A	chr1:57320442-57383894	0	0	0	0	0	0	0	0	0	0	0	0	0	0	0	0
C8B	chr1:57394882-57431688	0	0	0	0	0	0	0	0	0	0	0	0	0	0	0	0
DAB1	chr1:57463578-58716211	0	0.0145027	0	0	0	0	0	0	0	0.148642	0	0	0	0.0174682	0	0
OMA1	chr1:58946390-59012446	0.366468	0.909935	0.646963	0.677991	0.829307	0.748978	0.546032	0.562306	0.846636	0.512196	0.578258	0.368352	0.566373	0.571146	0.565704	1.21763
TACSTD2	chr1:59041094-59043166	20.0102	5.91873	7.22069	4.06724	6.26528	15.3207	4.08638	8.98104	7.67059	1.57462	13.0308	13.2189	1.09199	0.240184	6.74353	11.253
PRKAA2	chr1:57110989-57181008	0.331742	0.268638	0.47002	0.581685	0.408315	0.702935	0.158636	0.316417	0.298249	0.0174155	0.37827	0.374102	0.0440617	0	0.298348	0.679367
JUN	chr1:59246462-59249785	12.1119	5.88317	1.19436	10.3045	1.13464	2.11303	5.77132	1.00322	0.95163	11.6725	2.00604	0.678169	13.0599	9.29029	0.875845	2.43589
LOC100131060	chr1:59250822-59365384	0	0	0.0382321	0.458956	0	0.235485	0.422506	0.267413	0.183739	0.0429899	0.156458	0.0429295	0	0.0457398	0	0.174852
HSD52	chr1:59597607-59612479	0	0	0	0	0	0	0	0	0	0	0	0	0	0	0	0
FGGY	chr1:59762624-60228402	4.32188	4.35172	5.81841	5.31952	4.40086	5.01586	5.5008	4.26338	4.97734	3.16374	5.42884	4.01914	2.45143	2.60901	4.71329	4.35355
MIR4711	chr1:60198898-60198968	0	0	0	0	0	0	0	0	0	0	0	0	0	0	0	0
CYP2J2	chr1:60358979-60392423	0.0607307	0.098142	0.0952062	0.11295	0	0	0.0913457	0.0415026	0.0838228	0	0.0437778	0.0660318	0.0273322	0	0	0
C1orf87	chr1:60456065-60539442	0	0	0	0	0	0	0	0	0	0	0	0	0	0	0	0
HOOK1	chr1:60280532-60342050	0.404858	2.43588	0.410458	1.4837	0.704416	0.563487	1.76873	0.673506	0.362062	0.31909	0.444251	0.480051	0.291334	0.0683477	2.02245	0.461338
TM2D1	chr1:62146718-62191095	0.300784	0.732614	0.807599	0.499567	0.406567	0.831247	0.850484	0.360413	0.502421	1.57431	1.06096	0.726292	2.17953	1.7681	0.558568	0.639788
MYSM1	chr1:59120410-59165747	0.127044	0.16571	0.116579	0.150099	0.0893401	0.171422	0.173368	0.165919	0.097235	0.40077	0.131482	0.134839	0.452691	0.398233	0.148387	0.230177
L1TD1	chr1:62660473-62678001	0	0	0	0	0	0	0	0.00891753	0	0.0392141	0	0	0.0539984	0	0	0
KANK4	chr1:62701836-62785083	0.374996	1.06124	0.586155	1.28398	0.408781	0.543174	0.841628	0.598537	0.54362	0.132146	0.859845	0.967202	0.200122	0.0388084	1.64425	0.255592
INADL	chr1:62208148-62629591	0.407985	0.848902	0.231016	0.957483	0.404506	0.478196	0.400458	0.387512	0.334055	0.12028	0.488251	0.342995	0.166512	0.0350767	0.441418	0.466886
HEATR8	chr1:55107426-55175939	2.60883e-09	0	1.42934e-07	0	0	0.014265	1.21615e-07	1.34785e-14	3.04332e-16	0.121741	9.31191e-15	0	0.0234441	0.101698	4.79223e-31	1.00073e-10
HEATR8-TTC4	chr1:55107426-55208328	0.0464953	7.66939e-10	0.00875508	7.99324e-10	5.0459e-10	0.0289856	0.0100387	0.00916063	0.0180723	0.074305	0.0100602	5.04761e-10	0	6.26525e-17	0.00989639	0.0101019
TTC4	chr1:55181494-55208328	0.0965381	0.683523	0.22141	0.731644	0.299106	0.402492	0.336151	0.506965	0.340193	0.477033	0.218059	0.377769	0.80673	0.44955	0.615233	0.236709
USP1	chr1:62901974-62917475	0.479018	0.800702	0.398276	0.544788	0.559084	0.625933	0.697066	0.465425	0.488264	0.421367	0.54215	0.389844	0.5193	0.359401	0.775539	0.460525
LOC199899	chr1:63624753-63782901	0	0	0	0	0	0	0	0	0	0	0	0	0	0	0	0
FOXD3	chr1:63788729-63790797	0	0	0	0	0	0	0	0	0	0	0	0	0	0	0	0
ATG4C	chr1:63249776-63330941	0.296866	0.478323	0.346875	0.391615	0.559364	0.266397	0.63244	0.281454	0.375259	1.09136	0.335333	0.217194	0.658392	0.402568	0.554639	0.403797
ALG6	chr1:63833260-63904233	0.431633	0.317575	0.356154	0.347993	0.39116	0.379771	0.247572	0.452708	0.630356	0.190727	0.332511	0.610484	0.175237	0.408877	0.2772	0.410717
ITGB3BP	chr1:63906440-63988944	0.944574	0.313861	0.429302	0.659482	0.310132	0.229364	0.252724	0.367609	0.223788	0.689717	0.562583	0.550583	0.294443	0.380943	0.876631	0.552668
EFCAB7	chr1:63989012-64038364	0.0718391	0.105511	0.0158303	0.110931	0.0728257	0.0427616	0.0760036	0.0167413	0	0.0367423	0	0.0880285	0.11384	0.0537103	0.210173	0.0533131
DLEU2L	chr1:64014650-64016307	0	0	0	0	0.035601	0	0.0386152	0.0323933	0	0	0	0	0	0.0337587	0	0
DOCK7	chr1:62920396-63153969	0.137159	0.318114	0.216458	0.454649	0.386516	0.218214	0.423317	0.232996	0.22265	0.534949	0.253325	0.279248	0.511723	0.499009	0.265868	0.243714
ANGPTL3	chr1:63063186-63071180	0	0	0	0	0	0	0	0	0	0	0	0	0	0	0	0
UBE2U	chr1:64669489-64710027	0	0	0	0	0	0	0	0	0	0	0	0	0	0	0	0
PGM1	chr1:64058946-64125916	12.7093	31.9987	7.71055	27.3596	10.1355	10.9299	20.2248	10.8455	9.87856	7.60973	11.65	11.9663	7.33759	2.13174	23.909	12.2894
ROR1	chr1:64239689-64644707	0.612012	0.950819	0.772463	1.60611	1.00235	1.28015	2.67541	1.34089	1.55234	0.124643	1.61207	0.901892	0.155184	0.0145081	2.21535	1.16356
MIR3671	chr1:65523437-65523525	0	0	0	0	0	0	0	0	0	0	0	0	0	0	0	0
MIR101-1	chr1:65524116-65524191	0	0	0	0	0	0	0	0	0	0	0	0	0	0	0	0
CACHD1	chr1:64936475-65158741	0.0883203	0.0213659	0.0137591	0.0203736	0.0168188	0.0308239	0.0327538	0.022605	0.0150109	0	0.0399766	0.0308228	0	0.00818601	0	0.00784511
MIR4794	chr1:65045529-65045604	0	0	0	0	0	0	0	0	0	0	0	0	0	0	0	0
RAVER2	chr1:65210777-65298914	0.149153	0.283517	0.234946	0.511521	0.357778	0.188961	0.423899	0.333303	0.168663	0.0576433	0.189695	0.170185	0.0278615	0.0671045	0.354289	0.0657196
JAK1	chr1:65298905-65432187	1.24269	1.96456	0.986925	2.19578	1.55404	1.79572	3.04982	1.66076	1.36409	3.00664	1.45905	1.38308	4.65245	3.97043	2.6431	0.665116
DNAJC6	chr1:65730429-65881552	0.0429427	0.100397	0.0273092	0.0395659	0.0163179	0.0587934	0.0488909	0.00742091	0.00746218	0.0413195	0.0469691	0.0450906	0.0785199	0.0477908	0.0352868	0.0619406
PDE4B	chr1:66258192-66840262	0.610206	0.615513	0.596141	0.764858	0.77672	1.46862	0.548789	0.693893	0.537185	1.33889	0.822081	0.751104	0.918516	0.879812	0.726941	1.00089
SGIP1	chr1:66999824-67210768	0	0	0	0	0	0.012433	0	0	0	0	0	0	0	0	0	0
MIR3117	chr1:67094122-67094200	0	0	0	0	0	0	0	0	0	0	0	0	0	0	0	0
TCTEX1D1	chr1:67218139-67244730	0	0	0	0	0	0	0	0	0	0.0247636	0	0	0.0312076	0	0	0
INSL5	chr1:67263423-67266942	0	0	0	0	0	0	0	0	0	0	0	0	0	0	0	0
WDR78	chr1:67278571-67390570	0.0146693	0.010552	0.00964557	0.198168	0.145304	0.123839	0.112492	0	0	0.0112587	0.0108854	0.0222386	0.013834	0	0.026452	0.0468164
AK4	chr1:65613231-65697828	4.60633	8.95099	4.52662	7.56178	6.11468	6.69783	8.80004	4.98365	4.30414	1.34577	5.47057	5.10153	1.89508	0.921904	7.67334	4.82996
SLC35D1	chr1:67465014-67520080	0.23514	0.447989	0.282349	0.482837	0.286127	0.495384	0.777119	0.494644	0.368503	0.381016	0.432129	0.384186	0.404682	0.25111	0.560987	0.376512
C1orf141	chr1:67557858-67594220	0	0	0	0	0	0	0	0	0	0	0	0	0	0	0	0
LEPROT	chr1:65886130-65901690	2.06216	1.64861	1.69809	1.33232	2.04509	2.18598	1.91635	1.91904	2.03555	3.4746	2.15961	2.20858	3.27799	3.31769	1.14844	2.3868
LEPR	chr1:65886334-66103176	0.134983	0.0823216	0.0702724	0.153522	0.0303828	0.11763	0.0459051	0.015751	1.87399e-263	0.224088	0.0952873	0.0159463	0.235725	0.271854	0.118956	0.0794079
IL23R	chr1:67632168-67725650	0	0.0155203	0.0139871	0	0	0	0	0	0	0	0	0.0151822	0	0	0	0.0156797
IL12RB2	chr1:67773046-67862583	0.0583941	0	0.036846	0	0.0228682	0	0	0.0200873	0.00981899	0	0	0.0203593	0	0.0109969	0.0116881	0.0105148
GADD45A	chr1:68150859-68154021	1.12443	1.81782	0.776072	2.36923	1.29038	0.672136	1.49174	0.861354	0.658219	0.493135	0.565845	0.638149	0.836047	0.504368	1.04978	0.743323
GNG12	chr1:68167148-68299155	4.72358	6.36956	4.54889	8.40441	6.22475	6.66602	5.55562	4.13928	3.51336	1.54655	4.26431	4.44622	1.10264	0.40195	5.43841	5.76974
DIRAS3	chr1:68511644-68516460	0.242322	0	0.130397	0.0752478	0.224981	0.307038	0.284753	0.336131	0.340367	0	0.0300026	0.0869446	0	0	0.167163	0.591748
NFIA	chr1:61542945-61928460	0.340483	0.872692	0.50762	1.19268	0.910017	0.693344	0.720692	0.667883	0.681683	0.188839	0.593884	0.586134	0.182313	0.035745	0.555246	0.470724
RPE65	chr1:68894506-68915642	0	0	0	0	0	0	0	0	0	0	0	0	0	0	0	0
WLS	chr1:68564141-68698284	0.361013	0.0192122	0.100895	0.0276731	0.207881	0.114081	0	0.0731934	0.127224	0.494165	0	0.088393	0.411767	0.506431	0	0.114038
MIR1262	chr1:68649200-68649293	0	0	0	0	0	0	0	0	0	0	0	0	0	0	0	0
LRRC7	chr1:70225857-70589171	0	0	0	0	0	0	0	0	0	0	0	0	0	0	0	0
PIN1P1	chr1:70385004-70386000	0	0	0	0	0	0	0	0	0	0	0	0	0	0	0	0
LRRC40	chr1:70610484-70671361	0.407465	0.364166	0.147688	0.57412	0.304838	0.333538	0.285908	0.269571	0.18096	0.578883	0.414993	0.194779	0.485651	0.282821	0.299123	0.380499
DEPDC1	chr1:68939834-68962799	0.0243938	0.116526	0.0103283	0	0	0.0534722	0.00980743	0.0432435	0.0111826	0.0115457	0.0367377	0.0447456	0	0.0113685	0.154497	0.0364686
SRSF11	chr1:70671364-70717701	1.34727	2.71824	1.13409	2.47543	1.59966	1.8064	2.64925	1.57609	1.37336	2.5803	1.13314	1.05747	2.68718	2.21329	2.69269	1.28489
HHLA3	chr1:70820492-70833705	1.42747	1.97565	1.25151	2.0718	2.02915	1.73692	1.72477	0.922767	1.35669	0.597689	1.14611	1.44576	0.639362	0.484161	1.88631	1.53416
ANKRD13C	chr1:70724684-70820417	0.385267	0.516761	0.48342	0.649675	0.508867	0.626315	0.543384	0.514007	0.425244	0.306096	0.558774	0.463863	0.508329	0.316902	0.714602	0.46445
CTH	chr1:70876900-70905534	0.613794	1.05384	0.464966	0.428147	0.475288	0.411693	0.698568	0.473016	0.494427	0.214263	0.46804	0.594124	0.202218	0.139315	0.840726	0.650379
NEGR1	chr1:71868624-72748277	0	0.00929698	0	0	0.00946564	0.021545	0.0100884	0.0347799	0.0268172	0	0.0375512	0	0.0352469	0	0.0668502	0.0276357
LRRIQ3	chr1:74491701-74663871	0	0	0	0.0208423	0.016399	0	0	0.0154644	0	0	0	0.0159783	0	0	0.0404882	0.0162897
PTGER3	chr1:71318035-71513491	0.108207	0.129363	0.0876533	0.608551	0.961466	0.458156	0.0949106	0.0818193	0.124111	0.0385773	0.253948	0.219921	0.0119289	0.00725196	0.296896	0.127226
ZRANB2	chr1:71528973-71546972	0.874623	2.02035	0.800233	2.20713	1.50683	1.11498	1.21881	1.15162	0.873673	1.23088	0.96201	0.887929	1.12333	1.1197	1.88507	1.11671
LOC100132618	chr1:71512188-71532865	0	0.0137047	0.00134203	1.02257e-12	0.0649935	1.1947e-207	6.08969e-138	0.0185893	5.41096e-121	0.153989	1.51652e-05	2.28362e-76	0.0308155	0.0695999	1.57333e-71	0
MIR186	chr1:71533313-71533399	0	0	0	0	0	0	0	0	0	0	0	0	0	0	0	0
C1orf173	chr1:75033794-75139422	0	0	0	0	0	0	0	0	0	0	0	0	0	0	0	0
FPGT	chr1:74663895-74674148	0.293926	0.573554	0.243809	0.519793	0.73192	0.515425	0.649289	0.474921	0.326699	0.550447	0.447153	0.393538	0.518386	0.43153	0.460317	0.426987
FPGT-TNNI3K	chr1:74663895-75010116	0.0256468	0.113446	0.0399442	1.34937e-180	0.0197506	4.66087e-67	4.08038e-59	3.9386e-212	0.0560137	0.0493469	0.0851236	0.0638398	0.191259	0.112905	0.0401806	0.0544958
TNNI3K	chr1:74701070-75010116	0	8.50535e-12	4.48646e-14	0	1.23635e-19	0	0	0	6.16114e-12	5.37597e-27	1.22256e-50	8.94e-15	3.77468e-22	3.88755e-18	1.00794e-06	1.24807e-06
LHX8	chr1:75594118-75627218	0	0	0	0	0	0	0	0	0	0	0	0	0	0	0	0
SLC44A5	chr1:75667815-76076799	0.0837641	0.139599	0	0	0.0643434	0	0.0917015	0.0943932	0.160423	0.0209406	0.0742851	0	0	0	0.148717	0
ACADM	chr1:76190042-76229355	1.57471	2.50543	1.319	2.43566	2.80252	2.28379	2.28441	1.54444	1.11926	1.74995	1.81645	1.26116	1.05492	0.943232	1.88654	1.91972
RABGGTB	chr1:76251885-76260764	1.69942	3.78278	2.02292	4.1796	3.17517	2.47726	3.68959	2.30971	2.01386	2.89374	2.74275	2.31609	2.38346	2.46506	3.13249	2.11282
SNORD45C	chr1:76252756-76252834	0	0	0	0	0	0	0	0	0	0	0	0	0	0	0	0
SNORD45A	chr1:76253573-76253657	0	0	0	0	0	0	0	0	0	0	0	0	0	0	0	0
SNORD45B	chr1:76255161-76255232	0	0	0	0	0	0	0	0	0	0	0	0	0	0	0	0
MSH4	chr1:76262629-76378923	0	0	0	0	0	0	0	0	0	0.0141241	0	0	0.0178083	0	0	0
ASB17	chr1:76384557-76398116	0	0	0	0	0	0	0	0	0	0	0	0	0	0	0	0
ST6GALNAC3	chr1:76540388-77096669	0	0.165343	0	0.0191341	0.0159279	0	0.161767	0.0290852	0.067794	0.165505	0.353922	0.0148873	0.194882	0.211856	0.483595	0
ST6GALNAC5	chr1:77333185-77529737	0	0	0	0.029323	0.149184	0.0300862	0.167716	0.021705	0.0425434	0	0	0	0	0	0	0
PIGK	chr1:77554666-77685132	0.960924	0.517606	0.896736	1.33414	1.17201	1.32265	0.764538	1.52884	0.89214	0.697359	1.10332	0.838046	0.352096	0.399964	0.518308	0.846276
SERBP1	chr1:67873492-67896123	3.28452	7.08036	2.80971	5.02003	4.86298	4.2443	3.81771	3.44853	3.02416	3.063	3.39767	3.54788	3.27631	2.5239	4.6133	3.07661
ZZZ3	chr1:78030189-78148343	0.364413	0.442203	0.270371	0.460053	0.43531	0.254593	0.476927	0.37605	0.225968	0.504787	0.325645	0.300411	0.601847	0.477462	0.503164	0.400643
AK5	chr1:77747661-78025654	3.86788	1.44595	6.52387	5.43233	7.74102	10.9983	1.97123	5.37986	5.02904	1.30922	8.82603	7.52505	0.92338	0.219478	0.999236	1.90492
FAM73A	chr1:78245308-78344081	0.393012	0.292199	0.308858	0.343889	0.347041	0.349125	0.291828	0.339142	0.421518	0.308906	0.273434	0.415128	0.225926	0.234155	0.335495	0.411049
NEXN	chr1:78354199-78409578	0	0	0	0	0	0.0139881	0.0115034	0	0	0.0950925	0	0	0	0.0111572	0	0
CRYZ	chr1:75171171-75199092	0.779609	1.90355	0.650004	2.39986	1.40776	1.54791	1.4825	0.74421	1.15465	0.859686	1.06666	0.942264	0.687607	0.799267	1.53708	1.22608
TYW3	chr1:75198835-75232360	0.242995	1.08602	0.317855	0.64316	0.62164	0.236234	0.756989	0.358679	0.342041	0.471651	0.479747	0.392187	0.609514	0.33684	0.693996	0.371748
DNAJB4	chr1:78470635-78482995	0.505876	0.354638	0.218222	0.330717	0.268489	0.442278	0.596525	0.165973	0.213623	0.585927	0.287464	0.348947	0.367103	0.288529	0.239243	0.668851
FUBP1	chr1:78413590-78444777	1.25834	3.15138	1.0975	2.81765	2.24347	1.60766	2.05698	1.55095	1.37084	1.9978	1.35473	1.14303	1.79853	1.5335	2.39742	1.38417
MGC27382	chr1:78695282-78835147	0	0.0370162	0	0	0	0	0.0412686	0	0	0	0	0	0	0	0	0
PTGFR	chr1:78956727-79006386	0	0.00994054	0	0.0123805	0	0.0115404	0.0107801	0	0.00955428	0	0.00993002	0	0.050227	0.00977875	0.0535722	0
GIPC2	chr1:78511588-78603112	0.290516	0.0872992	0.114351	0.206455	0.322537	0.281925	0.139453	0.208522	0.124421	0	0.0922335	0.0914256	0	0.018388	0.0650277	0.275436
IFI44	chr1:79115476-79129763	0.308623	1.44554	0.68433	2.61147	1.60629	0.677459	1.59087	1.33775	1.034	5.45332	0.967842	1.01068	2.19937	2.3668	1.04297	0.870022
ELTD1	chr1:79355448-79472495	0	0	0	0	0	0	0	0	0	0	0	0	0	0	0	0
USP33	chr1:78161673-78225537	0.620814	1.19187	0.731936	1.18635	0.852979	0.778313	0.973723	0.810574	0.940895	1.41643	0.767947	0.885016	1.22905	1.17982	0.905821	0.679485
IFI44L	chr1:79086087-79111830	0.184587	0.465567	0.376403	0.906631	0.365821	0.259508	0.455879	0.266962	0.239757	5.2161	0.162853	0.126175	1.98085	2.14433	0.233486	0.249717
TTLL7	chr1:84335056-84464833	0	0.0318281	0	0	0	0.013828	0.0592206	0.0106397	0	0	0.0112281	0	0.0286139	0.0113113	0.0261294	0
SAMD13	chr1:84764048-84816481	0.049729	0.201308	0.134499	0	0.0386386	0.175787	0	0.0349167	0.0311094	0	0.0378373	0.193059	0.0474058	0	0.04046	0.143206
LPHN2	chr1:82266081-82458107	0.126046	0.22468	0.0606152	0.184437	0.0560143	0.0668968	0.4347	0.145528	0.152731	0.0404761	0.185557	0.134534	0.0194127	0.0156912	0.131358	0
UOX	chr1:84830640-84863576	0	0	0	0	0	0	0	0	0	0	0	0	0	0	0	0
DNASE2B	chr1:84864214-84880691	0	0	0	0	0	0	0	0	0	0.0462836	0	0	0.0553839	0	0.0503674	0
RPF1	chr1:84944919-84964033	0.911541	1.34994	0.631558	1.09069	0.540749	0.922515	1.21875	0.73868	0.961563	0.937982	0.859471	0.744257	0.851861	0.749233	0.94828	0.976852
GNG5	chr1:84964005-84972262	11.4868	13.4354	8.62917	14.5677	9.82947	7.20483	12.43	8.43924	7.74506	11.7608	6.89568	9.23278	14.9752	9.86364	11.9204	7.3428
C1orf180	chr1:85093912-85100703	0	0	0	0	0.0183196	0.0215368	0.0557403	0	0.0486369	0	0.0173783	0.0166278	0	0	0.0397761	0
CTBS	chr1:85018803-85040163	2.47642	2.11527	1.67485	1.89313	2.68631	3.29028	2.81071	2.57497	1.94952	2.27637	2.41414	2.26445	1.96306	1.60658	2.1429	2.54763
LPAR3	chr1:85279085-85358896	0	0	0	0	0	0	0	0	0	0.103713	0	0	0.0766437	0.0329097	0	0
MCOLN2	chr1:85391265-85462796	0.0432508	0.0446222	0	0.0200629	0.116643	0.0196603	0.0170425	0	0	1.42775	0	0	1.44761	1.94471	0	0
MIER1	chr1:67390577-67454302	0.281937	0.328167	0.159593	0.391798	0.351772	0.439013	0.343676	0.365955	0.346869	0.711787	0.246654	0.306153	0.772148	0.712127	0.455225	0.359997
WDR63	chr1:85527992-85598821	0	0.0256151	0.165886	0.334782	0.0413292	0.116144	0.308109	0.087804	0.114962	0.125701	0.10676	0.065423	0.067837	0	0.140643	0.0132341
MIR4423	chr1:85599476-85599556	0	0	0	0	0	0	0	0	0	0	0	0	0	0	0	0
MCOLN3	chr1:85483764-85514169	1.27902	0.431427	1.01809	1.11244	0.943103	1.81241	1.07921	1.46755	1.52179	0.803136	1.124	1.62392	0.42508	0.464627	0.638547	0.351691
SYDE2	chr1:85623355-85666728	0.0671241	0.0542067	0.0863924	0.0248279	0.0924237	0.036356	0.0617197	0.0750577	0.122216	0.020871	0.049275	0.0576243	0.0123804	0	0.0224587	0.127159
BCL10	chr1:85731459-85742587	0.267313	0.61133	0.404227	0.344984	0.47616	0.600719	0.517386	0.350826	0.261877	1.22243	0.443627	0.393764	0.987296	0.994409	0.629165	0.35186
C1orf52	chr1:85715636-85725355	0.306601	0.211371	0.177978	0.088464	0.1447	0.197674	0.269486	0.102683	0.117267	0.221836	0.13808	0.263302	0.285674	0.270767	0.269762	0.135293
CYR61	chr1:86046443-86049648	0.146334	0.0366545	0	0.376794	0.113398	0.221709	0.132902	0.0804328	0.0400541	0.0234299	0.0646917	0.0423358	0.23641	0.0222696	0.0231731	0.0424764
PRKACB	chr1:84543744-84704181	1.46154	1.85069	0.858583	2.06409	2.05443	2.09281	1.87351	1.39579	1.37037	1.05401	1.65268	1.36554	0.898918	0.362664	1.33898	1.52667
COL24A1	chr1:86194915-86622121	0	0.0486999	0.0156975	0.0291106	0.0193059	0.00774448	0.0946361	0	0.00552522	0.0195433	0	0.0120136	0	0.0124402	0.052936	0.0178823
DDAH1	chr1:85784167-86044046	6.89927	6.96185	8.39167	8.41326	10.2644	9.19662	8.17743	6.68202	6.9124	1.39695	8.90625	8.18468	0.909128	0.190782	8.71857	7.04177
CLCA2	chr1:86889768-86922240	0	0	0	0	0.0224779	0	0	0	0	0	0	0	0	0	0	0
CLCA1	chr1:86934525-86965974	0	0	0	0	0	0	0	0	0	0	0	0	0	0.0135196	0	0
CLCA4	chr1:87012758-87046432	2.52483	0.433219	1.29914	1.11829	1.01903	1.32014	0.447135	0.295823	0.598982	0.120717	1.86697	1.58844	0.159849	0.0143703	0.333328	1.00995
CLCA3P	chr1:87099958-87121059	0.0546765	0	0.0118941	0	0.0137901	0.0643076	0.0425236	0.0509593	0.0129358	0	0.10789	0.0646721	0	0	0	0.0264789
ZNHIT6	chr1:86115105-86174116	0.112785	0.246833	0.0873502	0.29282	0.135656	0.145885	0.187341	0.114033	0.123225	0.294971	0.180812	0.09236	0.316373	0.271768	0.279356	0.116293
2013-09-15	chr1:87328127-87380107	4.49948	4.34232	4.52029	4.29789	5.6525	4.93916	3.53529	4.06599	2.35406	5.70895	5.18245	5.28709	6.13672	5.33625	2.84486	5.29054
SSX2IP	chr1:85109389-85156240	0.406479	0.281901	0.230317	0.382042	0.4977	0.448026	0.437786	0.434944	0.268585	0.1535	0.342621	0.251243	0.14909	0.105556	0.635346	0.281215
LOC339524	chr1:87595447-87634886	0	0	0	0.0631799	0	0	0.0700439	0.0307701	0.016404	0.101815	0	0	0.0217292	0.0708132	0	0
ODF2L	chr1:86812506-86862025	0.269389	0.394554	0.21252	0.318916	0.267649	0.286265	0.551427	0.31754	0.221592	0.188421	0.330571	0.26091	0.0717951	0.160136	0.340976	0.268233
LOC100505768	chr1:87819209-87837338	0	0	0	0	0	0	0	0	0	0	0	0	0	0	0	0
LMO4	chr1:87794150-87814607	0.203093	0.393876	0.369098	0.3234	0.513607	0.515937	0.282737	0.447172	0.337695	0.932268	0.456014	0.430862	1.15638	1.09019	0.305189	0.448497
GTF2B	chr1:89318320-89357301	0.757966	1.32432	0.620782	1.33541	0.586429	0.777155	1.34145	0.867873	0.748437	1.22074	0.481713	0.576057	1.34289	1.02015	1.17211	0.586807
PKN2	chr1:89149921-89301938	0.356322	0.472292	0.492612	0.607198	0.439473	0.469562	0.624484	0.401195	0.329292	0.540972	0.478759	0.445256	0.504794	0.517401	0.407075	0.62563
HS2ST1	chr1:87380334-87575681	0.832113	1.49549	1.1929	0.874843	0.755446	1.57411	1.24655	0.862217	0.848767	1.30159	0.917511	1.50496	1.78978	1.47036	1.47393	0.638404
GBP3	chr1:89472359-89488549	1.10699	0.74661	0.628745	0.162796	1.82613	2.17431	0.96811	1.51849	1.34383	1.01775	1.62481	1.44486	0.584967	0.621498	0.364278	1.62147
GBP2	chr1:89573309-89591799	2.3024	2.2508	1.28415	3.35925	3.18934	2.33386	0.938351	1.59515	1.25072	4.13251	1.95299	1.79385	4.74986	4.01158	1.4237	1.75879
GBP1	chr1:89517986-89531043	0.0341583	0.547683	0.183347	0.641479	0.247463	0.112253	0.322033	0.211635	0.198464	5.87032	0.185074	0.0853061	8.08816	7.71382	0.138497	0.061482
GBP7	chr1:89597433-89641723	0.0440518	0.0143776	0.0279685	0.141263	0.0334103	0.122907	0.0998875	0.076371	0.0300798	0	0.111002	0.0477586	0	0	0.0532788	0
GBP5	chr1:89724633-89738544	0	0.183182	0.035404	0.152573	0.0652573	0	0.0667304	0.0389123	0	2.83644	0.0101712	0	2.84935	3.37236	0.0457057	0
GBP6	chr1:89829435-89853719	0	0.00784665	0	0	0	0	0	0	0	0	0	0	0	0	0	0
GBP1P1	chr1:89873237-89890493	0	0.00077904	0	0	0	0	0	0	0	0.24407	0	0	0.154549	0.325906	0	0
GBP4	chr1:89646830-89664633	0.0429902	0.254915	0.0623211	0.208098	0.0412714	0.0879677	0.0743417	0.0300652	0.00750943	2.44603	0.0157677	0.0419345	3.08835	3.16797	0.17907	0.00783096
FLJ27354	chr1:90090407-90098453	0	0	0	0	0	0	0	0	0	0	0	0	0	0	0	0
CCBL2	chr1:89401455-89458643	1.50935	0.978606	1.42278	1.35715	1.92421	1.58032	1.56297	1.66557	1.65666	0.990396	1.78126	1.78402	0.62664	0.365968	1.04462	0.951397
RBMXL1	chr1:89445138-89458643	0.0989847	0.4885	0.106592	0.246448	0.233281	0.210759	0.258524	0.219378	0.187204	0.332621	0.161349	0.186107	0.282686	0.316093	0.759798	0.259654
LRRC8C	chr1:90098643-90185094	0.0503584	0.0218247	0.0198118	0.0190196	0	0.00887108	0.0239715	0.0212169	0.00725641	0.441139	0.0300013	0.028638	0.329359	0.45356	0.0176764	0.0148475
GEMIN8P4	chr1:90458823-90460525	0	0.18831	0.09538	0.0696141	0.0297856	0.0717551	0.0568679	0.0256714	0	0.12018	0.0826005	0.0266225	0.0673417	0.0571725	0	0
LRRC8D	chr1:90286572-90401989	0.373772	0.396055	0.416527	0.584758	0.532907	0.338022	0.462913	0.451334	0.459459	0.766102	0.687989	0.520543	0.881448	0.744677	0.287771	0.412564
BARHL2	chr1:91177578-91182794	0	0	0	0	0	0	0	0	0	0	0	0	0	0	0	0
ZNF326	chr1:90460677-90494094	0.274792	0.350244	0.269564	0.334093	0.302668	0.353597	0.182933	0.33348	0.225734	0.372312	0.188549	0.234445	0.572385	0.681295	0.652845	0.26903
LRRC8B	chr1:89990396-90063420	0.280813	0.240557	0.284384	0.300995	0.299207	0.24983	0.363715	0.270507	0.220664	0.18651	0.264481	0.310195	0.288961	0.179599	0.473388	0.336348
ZNF644	chr1:91380856-91487671	0.31193	0.39868	0.0995687	0.595513	0.247345	0.333838	0.674269	0.32595	0.256904	0.629717	0.19007	0.285438	0.233263	0.349659	0.159794	0.176907
SH3GLB1	chr1:87170252-87213867	2.49665	4.53983	2.3459	3.68774	2.74297	2.9897	4.02997	2.4757	2.12379	2.16821	2.93042	2.92156	1.69052	1.54094	4.70817	2.66951
HSP90B3P	chr1:92100567-92109335	0	0	0	0	0	0	0	0	0	0	0	0	0	0	0	0
BRDT	chr1:92414927-92479985	0	0	0	0	0	0	0	0	0	0	0	0	0	0	0	0
EPHX4	chr1:92495532-92529093	0.964534	0.106995	0.334627	0.324412	0.275477	0.586351	0.0824631	0.175983	0.180809	0.0780653	0.569302	0.330899	0	0	0.0885874	0.185625
BTBD8	chr1:92545861-92613401	0.0858829	0.0616626	0.115195	0.11838	0.100107	0.0383243	0.105918	0.0301113	0.12234	0.134081	0.0961301	0.0944456	0.0813467	0.0324003	0.228449	0.0317014
HFM1	chr1:91726322-91870426	0.012046	0	0	0	0	0	0	0	0	0	0	0	0	0	0	0
C1orf146	chr1:92683572-92711367	0	0	0	0	0	0	0	0	0	0	0	0	0	0.0665141	0	0
KIAA1107	chr1:92632608-92650280	0.0576779	0.0562868	0.110843	0.0960155	0.110501	0.0929085	0.121688	0.103244	0.129457	0.0862805	0.0912114	0.0731648	0.0107153	0.0503087	0.0585205	0.141008
GFI1	chr1:92940317-92952433	0	0	0	0	0	0	0	0	0	0.0201331	0	0	0.0866435	0	0	0
GLMN	chr1:92711954-92764566	0.24199	0.596739	0.163986	0.311974	0.139877	0.160546	0.570289	0.277953	0.154049	0.254297	0.181589	0.268141	0.175092	0.246934	0.391544	0.182591
RPAP2	chr1:92764521-92853732	0.124754	0.343829	0.263776	0.433128	0.18466	0.174337	0.23177	0.246044	0.305561	0.255372	0.231794	0.234209	0.197825	0.167373	0.520804	0.334113
CDC7	chr1:91966403-91991321	2.24749	2.71091	2.57952	4.07818	2.34034	2.44932	6.58386	4.17014	3.91919	0.668548	2.12498	2.30878	0.788222	0.121306	4.48871	1.76116
RPL5	chr1:93297593-93307481	65.4278	148.627	46.88	130.133	85.3662	55.665	102.294	49.3591	38.4445	43.4974	58.0196	56.4055	48.0605	32.0636	111.149	47.9161
SNORD21	chr1:93302845-93302940	0	0	0	0	0	0	0	0	0	0	0	0	0	0	0	0
SNORA66	chr1:93306275-93306408	0	0	0	0	0	0	0	0	0	0	0	0	0	0	0	0
FAM69A	chr1:93307720-93427079	2.00444	1.25913	1.40616	1.83131	1.58122	2.20245	1.91517	1.99174	2.40535	0.415184	2.00274	2.16029	0.513419	0.255434	1.34185	2.132
EVI5	chr1:92974252-93257961	0.10084	0.346227	0.0939695	0.15672	0.0887788	0.157095	0.202687	0.129803	0.0601681	0.395344	0.111398	0.121368	0.370656	0.328326	0.203942	0.135916
CCDC18	chr1:93646280-93744287	0	0.0314798	0	0.112382	0	0.00981228	0	0.0151736	0	0.0497787	0	0	0.0315654	0.0479183	0.0771202	0.0160926
LOC100131564	chr1:93775665-93811368	0.0169549	0.0359762	0.0220797	0.108864	0.0649132	0	0.0674237	0.0119043	0.0118561	0.429484	0.0252231	0	0.426125	0.352902	0.0290583	0.0746345
DR1	chr1:93811477-93828148	1.05724	1.84168	1.31961	1.18095	1.1276	2.09125	0.806564	0.995607	0.803887	1.73604	1.36648	1.06097	1.6316	1.49473	1.12603	1.46762
MTF2	chr1:93544791-93604638	0.117585	0.205052	0.0935777	0.457838	0.155966	0.203564	0.214322	0.0539028	0.0895607	0.372337	0.0905822	0.0906733	0.58411	0.607271	0.242729	0.155363
BCAR3	chr1:94027348-94147385	0.231011	0.247768	0.139637	0.196789	0.194776	0.370056	0.169069	0.103532	0.264784	0.477191	0.276167	0.316296	0.569478	0.47724	0.174573	0.284806
LOC100129046	chr1:94057524-94065587	0	0	0.0464884	1.86277e-09	0.14269	0	0	0.0502607	0.0991511	0	0	0.0261078	0.0331334	9.39226e-12	0	3.76365e-09
MIR760	chr1:94312387-94312467	0	0	0	0	0	0	0	0	0	0	0	0	0	0	0	0
DNTTIP2	chr1:94335013-94344762	0.746632	0.999992	0.440598	0.834187	0.702804	0.653387	0.767683	0.699473	0.683037	1.07271	0.735528	0.547542	0.788951	0.844581	0.69781	0.611176
GCLM	chr1:94352589-94375012	1.18943	0.86532	1.06244	0.721656	1.47035	2.10786	1.39038	1.34433	0.798639	0.694066	1.62903	1.16121	0.932701	0.605519	1.65575	1.83203
FNBP1L	chr1:93913687-94020218	1.50659	2.78824	1.46963	2.53754	1.87219	2.21048	2.80889	1.98866	1.16027	0.560834	2.23428	1.73995	0.715707	0.269976	2.91342	2.02029
TMED5	chr1:93615298-93646246	0.822256	0.805123	0.890985	0.563653	0.869825	1.08176	0.900232	0.659574	0.536107	2.56137	1.07274	0.889898	2.16237	1.83598	1.05859	0.94531
ABCA4	chr1:94458393-94586705	0.00812475	0	0.0150659	0.0369717	0.012694	0.0157573	0.0298686	0.0166224	0.00538437	0	0.0118048	0	0.00719383	0	0.0125705	0
F3	chr1:94994731-95007413	1.33868	0.483037	0.55824	1.06649	0.318195	0.520342	1.01337	0.619144	0.437268	0.137665	0.381292	0.330181	0.287614	0.139148	0.284271	0.828383
ABCD3	chr1:94883932-94984219	1.68327	1.92679	1.51793	1.98411	1.65846	1.79342	1.59405	1.67447	1.18251	0.722639	1.94917	1.4966	0.581159	0.656931	1.74363	1.59811
CNN3	chr1:95362506-95392735	0.149742	0.298349	0.11393	0.272689	0.0895274	0.216505	0.33854	0.348584	0.0835244	0.0463096	0.196569	0.195232	0.0273872	0	0.0727567	0.108918
LOC729970	chr1:95393583-95428826	0	0	0	0	0	0	0	0	0	0	0	0	0	0	0	0
ALG14	chr1:95448278-95538507	0.639618	1.52434	0.416483	0.981288	0.713466	1.02307	0.833211	0.39002	0.346655	0.54026	1.11527	1.16397	0.976277	0.261821	0.664126	0.468447
SLC44A3	chr1:95285900-95360802	0.823109	0.392456	0.816905	0.691152	0.521397	0.622282	0.669184	0.816233	0.685143	0.107635	0.813462	0.623212	0.112246	0.0230743	0.488917	0.623605
FLJ31662	chr1:95940292-95944912	0	0	0	0	0	0	0	0	0	0	0	0	0	0	0	0
PTBP2	chr1:97187174-97280605	0.0210824	0.138142	0.027865	0.117995	0.0323495	0.13091	0.101532	0.0297855	0.030425	0.289112	0.0796101	0.0152275	0.139149	0.173788	0.0369288	0.0935352
ARHGAP29	chr1:94634462-94703307	0.085543	0.384048	0.102687	0.530373	0.203945	0.309363	0.256708	0.120096	0.136847	0.0645194	0.225845	0.193408	0.133323	0.0052436	0.272016	0.233812
MIR2682	chr1:98510798-98510907	0	0	0	0	0	0	0	0	0	0	0	0	0	0	0	0
MIR137	chr1:98511625-98511727	0	0	0	0	0	0	0	0	0	0	0	0	0	0	0	0
SNX7	chr1:99127235-99226056	0.490957	0.295729	0.183091	0.265661	0.377051	0.384505	0.47923	0.261759	0.23733	0.473249	0.201554	0.18509	0.750664	0.467519	0.406561	0.281014
LPPR5	chr1:99355800-99470449	0	0	0	0	0	0	0	0	0	0	0	0	0	0	0	0
LOC100129620	chr1:99469831-99614408	0	0	0	0	0	0	0	0	0	0	0	0	0	0	0	0
LPPR4	chr1:99729847-99775138	0	0	0	0.0660416	0	0	0	0	0	0	0	0	0	0	0	0
PALMD	chr1:100111430-100160097	0	0.0134022	0	0	0	0	0.029546	0	0	0.0155128	0	0	0.0371053	0.0148167	0.0163889	0
MIR548D1	chr1:100154610-100178513	0	0	0	0	0	0	0	0	0	0	0	0	0	0	0	0
FRRS1	chr1:100174258-100231349	0.0255937	0.140497	0.0499065	0.0474736	0.0596365	0.0234175	0.0202759	0.0711102	0.052892	0.897743	0.0192251	0.0728659	0.402998	0.346178	0.175868	0
DPYD	chr1:97543299-98386615	1.03715	2.14201	1.85899	2.75212	1.69229	2.60866	2.96784	2.53621	3.01219	8.58684	1.473	1.47161	5.01184	5.0003	1.78017	1.28541
SLC35A3	chr1:100435539-100489006	2.04789	0.973605	1.45763	1.36897	1.91352	1.95648	1.09116	1.81596	1.49329	0.778789	2.10761	1.93105	0.662303	0.760115	1.26414	1.69661
HIAT1	chr1:100503788-100548929	0.822708	0.791503	0.984168	0.932767	1.10792	1.67052	1.24504	1.44737	0.981451	2.09168	1.2023	0.951868	2.08501	2.20593	1.144	1.24223
SASS6	chr1:100549101-100598511	0.0483448	0.318349	0.0743837	0.313927	0.0954374	0.15619	0.28678	0.169828	0.129006	0.0845313	0.142488	0.0704184	0.0912773	0.0470968	0.43128	0.106572
TGFBR3	chr1:92145899-92371559	3.76589	5.0013	3.8099	5.48108	4.03966	5.1339	7.30159	6.41745	6.28532	0.700711	4.47241	4.08871	0.531074	0.107113	6.07527	7.16078
CCDC76	chr1:100598705-100616054	0.211594	0.154894	0.139952	0.396184	0.235658	0.242926	0.265934	0.11794	0.168236	0.26747	0.230623	0.120839	0.238765	0.216666	0.280585	0.0767566
LRRC39	chr1:100614412-100643771	0	0	6.84123e-10	3.90397e-10	0	7.18083e-12	0	0	0	0.185779	0	0	0.0323002	0.0252758	0	0
RTCD1	chr1:100731713-100758325	1.56352	2.39449	1.53101	2.14401	2.0053	1.91618	2.00762	1.2722	1.4063	1.68434	1.6072	1.58698	1.17989	1.83068	2.12948	1.3749
MIR553	chr1:100746796-100746864	0	0	0	0	0	0	0	0	0	0	0	0	0	0	0	0
TMEM56	chr1:95558072-95663161	0.1864	0.0627475	0.116516	0.0416106	0.0393504	0.233796	0.0735044	0.0659451	0.0116059	0	0.0753878	0.0612994	0	0	5.65667e-108	0.246525
TMEM56-RWDD3	chr1:95583478-95710509	1.12887e-259	0.110882	0.00777532	7.05065e-219	8.57428e-127	0.0750974	0.0840907	0.0702244	6.06758e-59	8.00345e-155	0.0561441	4.79055e-303	1.69735e-28	1.65049e-104	0.0645397	0.203467
RWDD3	chr1:95699710-95712781	0.430476	0.312162	0.195482	0.341278	0.156539	0.383242	0.226222	0.150833	0.303615	0.443127	0.275025	0.322653	0.306903	0.242053	0.169127	0.203894
CDC14A	chr1:100818022-100985833	0.157766	0.0868894	0.0461076	0.0144842	0.0473681	0.0558671	0.0873591	0.0574138	0.125926	0.214162	0	0.0110975	0.20044	0.17392	0.0818168	0.073549
GPR88	chr1:101003727-101007583	0	0	0	0	0	0	0	0	0	0	0	0	0	0	0	0.0186035
LOC100128787	chr1:101092605-101112560	0	0	0	0	0	0	0	0	0	0	0	0	0	0	0	0
VCAM1	chr1:101185195-101204601	0	0.41357	0.255388	0.814138	0.0591948	0.113322	0.346377	0.188213	0.0845102	0.475166	0.304312	0.376972	0.56563	0.216319	0.168732	0
EXTL2	chr1:101337940-101360418	0.122886	0.253142	0.0689248	0.155824	0.11059	0.210881	0.203701	0.0735737	0.103896	0.355845	0.15881	0.122154	0.137339	0.175244	0.107936	0.14006
DPH5	chr1:101455179-101491362	0.75042	1.35082	0.61126	1.44824	0.914388	0.552534	0.70743	0.536604	0.564465	0.49491	0.839986	0.83652	1.0037	0.503263	0.919345	0.547194
S1PR1	chr1:101702304-101707076	0	0	0	0	0	0	0	0	0	0.018581	0	0	0.041483	0.0350386	0.018521	0
OLFM3	chr1:102268126-102462790	0	0	0	0	0	0	0	0	0	0	0	0	0	0	0	0
DNAJA1P5	chr1:102337566-102360299	0	0	0	0	0	0	0	0	0	0	0	0	0	0	0	0
COL11A1	chr1:103342022-103574052	0	0	0	0	0	0	0	0	0	0	0	0	0	0	0	0
DBT	chr1:100652477-100715409	0.877514	1.50218	0.628168	1.20787	1.02051	1.01794	1.40811	0.812558	0.854406	0.401048	0.848787	0.776869	0.291655	0.266222	1.13053	0.742195
RNPC3	chr1:104068577-104097859	0.32809	0.575739	0.293876	0.841234	0.292992	0.268389	0.493591	0.288778	0.361656	0.904467	0.39312	0.237456	0.86412	0.415134	0.52887	0.218962
AMY2B	chr1:104097321-104122149	0.23554	0.405339	0.212536	0.425899	0.665981	0.15992	0.166523	0.0616243	0.242159	0.389014	0.554724	0.278976	0.137996	0.397546	0.307849	0.0657476
LOC648740	chr1:104112025-104114008	0	0	0	0	0	0	0	0	0	0	0	0	0	0.0249752	0	0
AMY2A	chr1:104159998-104168400	0.752568	0.292676	1.02557	0.370652	1.14046	0.577484	0.388709	1.11184	1.22262	0.117337	1.26913	0.853259	0.0700698	0.0848755	0.190746	0.35859
AMY1A_dup3	chr1:104198140-104207173	0.0351651	0	0.102447	0	0.108679	0	0.000126325	0	0.0240886	0	0.241165	0.137559	0	0	0	5.92064e-05
AMY1C_dup3	chr1:104198302-104207172	3.08854e-06	0	1.89416e-06	0	2.8231e-06	0	0.000220715	0	8.52045e-07	0	5.77525e-07	7.20664e-07	0	0	0	6.59269e-05
AMY1B_dup3	chr1:104198324-104207172	2.1758e-05	0	3.18611e-05	0	7.41799e-05	0	0.109384	0	5.5294e-05	0	2.03445e-05	9.62317e-05	0	0	0	0.0253875
AMY1A_dup2	chr1:104230039-104239073	0	0	0	0	0	0	0	0	0	0	0	0	0	0	0	0
AMY1B_dup2	chr1:104230040-104238889	0	0	0	0	0	0	0	0	0	0	0	0	0	0	0	0
AMY1C_dup2	chr1:104230040-104238911	0	0	0	0	0	0	0	0	0	0	0	0	0	0	0	0
LOC100129138	chr1:104615644-104619693	0	0.0618379	0.0647783	0	0	0.0508293	0.0382802	0.0352703	0.104028	0	0	0.0725154	0	0	0	0.0370233
PRMT6	chr1:107599266-107601916	1.4835	3.20911	1.53174	3.22043	2.32309	2.43616	3.11095	1.79345	1.77781	0.986973	2.44782	1.83559	0.928636	0.464228	2.91593	1.16078
AMY1A_dup1	chr1:104292278-104301311	0.0166296	0	0.0227564	0	0	0.0318633	0.111227	0.0243127	0	0	0	0.0844917	0	0	0.119483	0
AMY1C_dup1	chr1:104292440-104301310	0.0175028	0	2.07821e-06	0	0	1.21236e-06	5.81614e-06	1.9549e-06	0	0	0	0.0179116	0	0	5.36691e-06	0
AMY1B_dup1	chr1:104292462-104301310	3.73288e-07	0	1.46822e-05	0	0	8.16063e-05	3.39181e-05	1.52415e-05	0	0	0	2.86057e-12	0	0	3.64667e-05	0
NTNG1	chr1:107682628-108024475	0.257703	0.0869919	0.526649	0.753896	0.244792	0.393761	0.161417	0.162752	0.0730704	0	0.202631	0.300119	0.0192284	0	0.192421	0.169932
SLC30A7	chr1:101361631-101447311	0.230292	0.638772	0.294295	0.415829	0.272317	0.378855	0.418718	0.428917	0.46754	0.609538	0.263692	0.20289	0.645699	0.55113	0.618863	0.310516
NBPF4	chr1:108765962-108786703	0	0	0	0	0	0	0	0	0	0.0162827	0	0	0	0	0	0
NBPF6	chr1:108992903-109013260	0	0	0	0	0	0	0	0	0	0	0	0	0	0	0	0
SLC25A24	chr1:108677446-108742974	0.284724	0.469215	0.238953	0.360979	0.530247	0.982894	0.360855	0.499329	0.217569	3.22237	0.441382	0.420526	2.28882	2.96556	0.317273	0.22478
VAV3	chr1:108113781-108507545	1.07023	1.61165	1.22413	2.14268	2.28584	2.80001	1.25727	1.66841	1.28725	0.986079	1.93768	1.34254	1.15206	0.970235	1.04879	1.50896
HENMT1	chr1:109190909-109204148	0.413906	0.417824	0.242749	0.650556	0.206715	0.339195	0.504338	0.259984	0.146113	0.378075	0.145817	0.191563	0.415888	0.559369	0.4814	0.247407
FNDC7	chr1:109255555-109285367	0	0	0	0	0	0	0	0	0	0	0	0	0	0	0	0
FAM102B	chr1:109102970-109181949	0.373856	0.336954	0.341198	0.301593	0.535791	0.362069	0.403779	0.410189	0.250023	0.94511	0.458217	0.333455	0.648765	0.751238	0.336772	0.475874
AKNAD1	chr1:109358524-109399716	0	0	0	0	0	0	0	0	0	0	0	0	0	0	0	0
SRG7	chr1:109399838-109401146	0	0	0	0.116417	0	0.115489	0	0	0	0	0	0	0	0	0	0
STXBP3	chr1:109289284-109352148	1.02364	0.843968	0.520833	1.39129	0.961104	1.2777	0.949311	0.98758	0.654653	1.775	0.776356	0.753832	1.04954	1.25371	0.973757	0.886839
PRPF38B	chr1:109234931-109244422	0.234081	0.511757	0.220548	0.401143	0.153671	0.257565	0.321281	0.367202	0.342063	1.19982	0.272036	0.251874	0.946676	0.839362	0.206156	0.270357
TAF13	chr1:109606997-109618624	2.03908	5.22977	2.18388	5.16777	3.00426	3.17087	3.37353	1.43626	0.761429	2.40921	1.62833	1.86596	1.63739	1.00611	4.3272	1.86176
TMEM167B	chr1:109633402-109639554	1.04102	0.92018	0.858368	1.3741	1.52229	1.23392	0.962814	0.962966	0.568994	1.81378	1.13074	0.975381	2.32645	1.48657	0.710503	1.28107
SCARNA2	chr1:109642814-109643234	0	0	0	0	0	0	0	0	0	0	0	0	0	0	0	0
C1orf194	chr1:109648572-109656479	0	0	0	0.0640742	0.0523938	0	0	0.0458767	0	0	0	0	0	0	0	0
GPSM2	chr1:109419602-109473044	0	0.0771462	0.0332279	0.0435025	0.0166294	0	1.52778e-88	0.0300158	0.0296409	2.90413e-312	1.28544e-133	0.0157505	0	0.0836124	0.127482	0.030548
CLCC1	chr1:109472129-109506111	1.05484	1.22776	0.729146	0.868578	0.822941	0.710122	0.844347	0.688154	0.881864	1.06019	0.817238	0.799371	0.71948	0.782659	0.834793	0.904721
WDR47	chr1:109512837-109584850	0.322443	0.271954	0.142507	0.314558	0.382297	0.253828	0.367359	0.214461	0.165229	0.443086	0.281736	0.282244	0.447449	0.416833	0.348223	0.32994
KIAA1324	chr1:109656584-109749403	7.1981	6.58587	5.85128	6.99537	5.94746	4.25412	4.89605	4.45456	4.40546	1.43408	7.08853	7.73928	1.05694	0.195958	7.18574	5.97074
PSRC1	chr1:109822175-109825790	0	0.0918896	0.0919145	0.192753	0.0270524	0.151934	0.159645	0.120292	0	0.11081	0.0248909	0.151745	0.0300914	0.0259067	0.140974	0.0241944
MYBPHL	chr1:109834986-109849663	0	0	0	0	0	0	0	0	0	0	0	0	0	0	0	0
SARS	chr1:109756514-109780804	5.03867	10.0142	5.88987	9.75428	6.73063	6.60828	7.80537	5.70094	5.59002	6.43109	5.93044	5.94793	6.707	4.81175	8.45921	5.55315
AGL	chr1:100315639-100389579	0.37855	0.668366	0.302373	0.978397	0.456151	0.546965	0.58192	0.273594	0.180988	0.30758	0.302924	0.335524	0.34867	0.255159	0.629475	0.159903
SYPL2	chr1:110009099-110024764	0.0189381	0.0112623	0	0	0	0	0	0	0	0	0	0	0.0165083	0.0141339	0	0.0134428
CELSR2	chr1:109792640-109818378	0.139849	0.0908142	0.155823	0.161232	0.172562	0.174057	0.121779	0.0928198	0.101909	0.0702929	0.147413	0.165008	0.0278977	0.0302802	0.273777	0.156836
ATXN7L2	chr1:110026560-110035420	0.0263792	0.0724772	0	0.0478314	0.0206757	0.0265276	0	0.0877479	0.0335716	0.0854719	0	0.0356211	0.20076	0.216961	0.038443	0.0183903
PSMA5	chr1:109941652-109969108	0.915714	2.43022	0.975754	1.53737	1.29397	1.08518	1.27434	1.00705	0.895149	1.33128	1.05721	0.788452	1.46292	1.16416	1.80796	1.1149
GPR61	chr1:110082493-110088455	0	0	0.0150044	0	0	0	0	0	0	0	0	0	0	0	0	0
AMIGO1	chr1:110049445-110052336	0.816232	0.46123	0.949053	0.779864	1.05026	1.25112	0.735044	1.26212	1.11622	0.1297	1.32945	1.30463	0.164024	0.0406101	0.917128	0.73811
MIR197	chr1:110141514-110141589	0	0	0	0	0	0	0	0	0	0	0	0	0	0	0	0
GNAT2	chr1:110145888-110155705	0	0.0256499	0	0.0360837	0	0	0.0299887	0	0.0265887	0	0.0285691	0	0	0	0.032038	0
GNAI3	chr1:110091185-110138452	1.12542	1.86126	0.98659	1.91497	1.41567	1.45292	1.24911	1.33565	0.890891	2.0003	1.08831	1.13648	2.1843	1.39299	1.4746	1.21456
SORT1	chr1:109852187-109940563	3.71325	1.27944	3.3711	2.15515	3.81708	3.75079	2.5859	3.85195	3.88664	2.59269	3.99604	3.89942	2.78407	2.47973	2.65009	4.12581
GSTM4	chr1:110198697-110208123	0.878934	0.720526	0.682671	0.76238	0.856119	0.405492	0.593672	0.800914	0.495715	1.16489	0.546029	0.784381	1.11617	0.734435	0.621594	0.30924
GSTM2	chr1:110210643-110226619	0.410746	0.283876	0.123923	0.56211	0.701904	0.252206	0.198305	0.210103	0.180159	0.55414	0.292462	0.458775	0.400758	0.229798	0.362565	0.190578
GSTM1	chr1:110230417-110236367	0	0	0.0307859	1.38641	0.732179	0	0	0	0	1.67727	1.20285	1.44826	1.45166	0.841127	0	0
AMPD2	chr1:110162458-110174677	0.404373	0.913503	0.295233	1.16819	0.482925	0.517044	0.770753	0.494085	0.363357	1.30851	0.649145	0.464101	0.864653	0.680828	1.23224	0.400893
GSTM3	chr1:110276553-110283660	0	0.182701	0.167552	0.17398	0.245283	0.0951333	0.102494	0.0714563	0.110577	0.136232	0.254213	0.228128	0.135898	0.0492948	0.0637604	0.231066
EPS8L3	chr1:110292701-110306644	0	0	0	0	0	0	0	0	0	0	0	0	0	0	0	0
GSTM5	chr1:110254863-110260890	0.0173199	0	0	0	0	0	0	0	0	0	0	0	0	0	0	0.0121641
FAM40A	chr1:110577240-110597263	0.327782	0.483474	0.314886	0.395986	0.391309	0.45777	0.44699	0.390886	0.406398	0.970861	0.335014	0.405407	1.08408	0.85114	0.50532	0.29001
ALX3	chr1:110602996-110613322	0	0.207253	0.168503	0	0.186881	0.093468	0.171043	0.124335	0.030936	0.192572	0.100834	0.0958179	0.23975	0.0354369	0	0.0329053
UBL4B	chr1:110655061-110656569	0	0	0	0	0	0	0	0	0	0	0	0	0	0	0	0
CSF1	chr1:110453232-110472355	0.294709	0.760118	1.3368	0.850601	0.706816	0.602467	0.567825	1.57737	1.55422	3.0101	0.518804	0.639679	5.18588	4.06653	0.302165	1.07205
SLC6A17	chr1:110693131-110744823	0.073406	0.0423899	0.0254643	0.0379337	0.126007	0.0619883	0.0540167	0.0355067	0.047506	0.0171392	0.0912199	0.129137	0.00912032	0	0.0939695	0.103659
CYB561D1	chr1:110036657-110043063	0.341693	0.312775	0.462473	0.232527	0.401182	0.581313	0.361449	0.410763	0.341667	0.389952	0.374299	0.459533	0.443189	0.437216	0.242158	0.37247
LOC440600	chr1:110828998-110881793	0.0258598	0.0334337	0.0489466	0	0	0	0.0390873	0.0177919	0	0	0	0.0180004	0.0231988	0.0192173	0	0
RBM15	chr1:110881944-110889303	0.0916577	0.194756	0.127639	0.191014	0.0870629	0.106645	0.171141	0.107957	0.069869	0.340625	0.0677008	0.0575889	0.501695	0.209444	0.184792	0.119791
HBXIP	chr1:110943876-110950546	3.21168	5.38676	3.0812	4.94327	4.36212	4.49623	4.78381	3.79705	2.29741	2.99013	3.75642	3.6564	5.41125	2.67803	3.62311	2.52269
PROK1	chr1:110993787-110999976	0.0519494	0	0	0	0	0	0	0	0	0	0	0	0	0	0	0
CYMP	chr1:111023387-111033891	0	0	0	0	0	0	0	0	0	0	0	0	0	0	0	0
KCNA10	chr1:111059838-111061797	0	0	0	0	0	0	0	0	0	0	0	0	0	0.0500175	0	0
KCNA2	chr1:111136201-111174096	0	0	0	0	0	0	0	0	0	0	0	0	0	0	0	0
KCNA3	chr1:111214309-111217655	0	0	0	0	0.03677	0	0	0	0	0.0371934	0.0172364	0	0.202913	0.121717	0	0.0334636
CD53	chr1:111413820-111442558	0	0.83787	0.0267969	0.870446	0	0.171681	0.323704	0	0	23.6427	0.161208	0	21.5521	20.2573	0.281779	0.0300195
LRIF1	chr1:111489811-111506566	0.519871	0.43763	0.343757	0.457535	0.201926	0.516484	0.291634	0.430302	0.551286	0.580547	0.423763	0.449559	0.455833	0.332968	0.723841	0.571024
KCNC4	chr1:110753335-110776674	0.139359	0.156037	0.0124625	0.161173	0	0.148414	0.0151791	0.0138149	0	0.435522	0.151205	0.165499	0.260695	0.37656	0.163873	0.135025
DENND2D	chr1:111729800-111743281	0.570918	1.27733	0.427718	1.2187	0.685913	0.994471	0.923737	0.565106	0.651236	3.26012	0.554682	0.571006	2.84342	3.10128	0.709622	0.513115
DRAM2	chr1:111659953-111682838	1.01029	1.03427	1.03818	1.78866	1.17955	1.59129	0.921708	0.867388	0.849822	4.71577	1.37428	1.2093	3.83173	3.2184	1.08373	1.58769
CEPT1	chr1:111682248-111727724	1.05821	1.33951	0.606429	0.666641	0.899623	0.974668	0.958805	1.11666	1.28856	2.91564	1.35627	0.986947	2.23256	2.61443	0.780145	1.06219
RP11-165H20.1	chr1:111823145-111828730	0	0	0	0	0	0	0	0	0	0	0	0	0	0	0	0
CHIA	chr1:111833483-111863185	0	0	0	0	0	0	0	0	0	0	0	0	0	0	0	0
AHCYL1	chr1:110527386-110566364	5.46803	9.74684	6.50329	8.76139	8.45176	8.51756	8.50423	7.80996	6.87187	4.37363	6.89317	6.94385	4.04729	3.16229	8.56429	9.22026
PGCP1	chr1:111927140-111932473	0	0	0	0	0	0	0	0	0	0	0	0	0	0	0	0
OVGP1	chr1:111956936-111970399	0	0	0	0	0.0222932	0	0.0211853	0	0	0	0	0	0	0.0212656	0.0227482	0
CHI3L2	chr1:111770280-111786062	0.218498	1.68652	0.211458	1.03707	0.808844	0.152531	1.09903	0.19837	0.198608	0.602696	0.654222	0.486365	0.584997	0.425952	1.28866	0.117728
C1orf162	chr1:112016603-112021134	0.0679789	0.556876	0.0892662	0.784551	0.155157	0	0.104204	0.0946083	0.144521	9.84621	0	0.147696	7.66211	6.47043	0.115508	0
C1orf88	chr1:111889194-111895639	0.0273658	0.0569895	0	0.0758145	0.0424895	0.0246952	0	0	0	0	0	0	0.0507647	0	0	0.0201863
ADORA3	chr1:112025969-112106597	0	0	0	0	0	0	0	0	0	0.754726	0	0	0.231877	0.543757	0	0.0226128
LOC100129269	chr1:112141628-112150940	0.0361568	0	0	0	0.0273987	0	0	0	0	0.0280668	0	0.0496097	0	0	0.0278049	0
SLC16A4	chr1:110905472-110933704	2.32516	2.6013	3.14142	2.44459	2.75714	4.02557	3.22932	3.73333	3.43725	0.600553	3.91677	2.8987	0.177656	0.120212	2.22895	3.63876
WDR77	chr1:111982511-111991830	0.52507	1.49115	0.41092	1.58723	0.738054	0.73852	0.753872	0.697079	0.756808	1.15974	0.736229	0.673856	1.14605	0.789033	1.0644	0.547007
ATP5F1	chr1:111991742-112004525	4.35784	7.28888	3.4222	6.83235	4.95898	5.13542	6.04252	3.67819	3.14457	3.7827	4.72672	4.65896	4.47351	3.1813	5.61029	4.83291
RAP1A	chr1:112162404-112256101	3.58278	3.85228	3.49782	4.21173	4.95394	5.78355	3.60952	4.25323	3.10599	5.71887	4.66744	3.82245	4.78497	5.98303	4.2521	4.74061
MIR4256	chr1:113004391-113004455	0	0	0	0	0	0	0	0	0	0	0	0	0	0	0	0
WNT2B	chr1:113010039-113063910	0	0	0	0.12058	0	0	0	0	0	0.321013	0	0	0.117348	0.112258	0	0
KCND3	chr1:112318453-112531777	0.501717	0.0751542	0.490094	0.217139	1.31574	0.538668	0.384045	0.663724	1.0193	0	0.749345	0.714183	0	0	0.246696	0.583335
CAPZA1	chr1:113162074-113214241	3.56223	6.92409	3.44122	5.27761	6.0057	4.54807	5.43423	4.0805	3.51696	10.4214	3.83612	3.99186	9.48356	8.68721	5.24165	3.25871
CTTNBP2NL	chr1:112938799-113003786	0.313578	0.413935	0.157528	0.412814	0.583413	0.340278	0.314943	0.451941	0.294356	1.34007	0.341615	0.350374	1.00042	0.905123	0.460643	0.326551
RHOC	chr1:113243748-113250025	12.3562	9.08946	8.18693	12.5055	15.9111	11.718	7.43124	14.7222	13.2954	5.12737	13.7657	14.05	5.27422	2.8904	8.08447	11.2642
PPM1J	chr1:113252615-113257950	0.039023	0.240881	0.25944	0.246414	0.221664	0.116215	0.173576	0.262594	0.102119	0.0646032	0.228985	0.1948	0	0	0.058081	0.0557377
FAM19A3	chr1:113263188-113269856	0	0	0	0	0	0.266316	0.166963	0	0	0	0	0	0	0	0	0
MOV10	chr1:113217047-113243368	1.44056	1.02425	0.861838	1.07593	1.73604	1.14571	1.03585	1.64454	1.18718	2.16139	1.09369	1.37915	1.24934	1.41985	1.04376	0.881049
LRIG2	chr1:113615830-113667342	0.059245	0.0301425	0.0762893	0.0825576	0.0227198	0.0269797	0.0113026	0.0411452	0.0205113	0.2649	0.0326162	0.0419759	0.286353	0.176817	0.0741965	0.0649803
LOC643441	chr1:113739403-113748875	0	0	0	0	0	0	0	0	0	0	0	0	0	0	0	0
C1orf183	chr1:112264685-112298419	0.106518	0.0516615	0.0671698	0	0.08435	0.10031	0.0240534	0.128451	0.105742	0.213919	0.116714	0.0530158	0.192805	0.150849	0.0334115	0.0629596
DDX20	chr1:112298189-112310199	0.175496	0.293279	0.124193	0.275898	0.206465	0.44336	0.211704	0.171362	0.186248	0.435132	0.0991657	0.166334	0.399841	0.404157	0.307572	0.100447
LOC100506343	chr1:112282462-112290420	0	0	0	0	0	0	0	0	0	0	0	0	0.119145	0	0	0
SLC16A1	chr1:113454469-113498975	2.57109	1.29213	4.87972	2.60811	5.6319	4.01203	2.38004	6.17078	5.68734	0.790707	4.72199	5.22238	0.571889	0.29946	2.42949	3.43125
AKR7A2P1	chr1:113465971-113467295	0	0	0	0	0	0	0	0	0	0	0.0348463	0	0	0	0	0
PHTF1	chr1:114239823-114301777	0.132261	0.0770669	0.0973076	0.0348116	0.116142	0.0687315	0.0879734	0.066013	0.13284	0.352911	0.125492	0.0684802	0.192631	0.450943	0.0955543	0.150996
ST7L	chr1:113066140-113162040	0.240007	0.288579	0.271128	0.360592	0.285127	0.476369	0.178619	0.156748	0.119341	0.438392	0.27042	0.151497	0.311897	0.253738	0.502437	0.395571
PTPN22	chr1:114356432-114414375	0	0.0510613	0	0.0167412	0	0.016014	0.11252	0	0	0.53315	0.0521984	0	0.272181	0.435025	0	0
LOC100287722	chr1:114399256-114443859	0.142934	4.22445e-09	6.74713e-09	3.84707e-09	5.22289e-09	2.08185e-08	3.20651e-10	0	3.86406e-10	8.53325e-09	0.00411852	1.11432e-06	7.98305e-07	0.0776539	2.28763e-09	1.92205e-09
AP4B1	chr1:114437676-114447741	0.132049	0.819178	0.4312	0.554672	0.451028	0.634958	0.621136	0.144066	0.458438	0.688926	0.266843	0.150827	0.544109	0.27824	0.508689	0.154592
BCL2L15	chr1:114419435-114430169	0	0.0100705	0.00932366	0.0404448	0	0.0128294	0.0113809	0.0199809	0	0.0108901	0.0105966	0.0102357	0.0132606	0.0316645	0	0.0105233
DCLRE1B	chr1:114447914-114456708	0.017174	0.187524	0.0758278	0.0946907	0.0133548	0.0636546	0.038985	0.0236938	0.0467873	0.526189	0.0251451	0.0482096	0.44957	0.719237	0.0696095	0.0862824
RSBN1	chr1:114304453-114355070	0.118816	0.245052	0.0990541	0.264687	0.123766	0.153792	0.153922	0.114503	0.13239	0.313913	0.137068	0.171672	0.312135	0.265401	0.168	0.231824
OLFML3	chr1:114522029-114524875	0.0320636	0	0.0996351	0.0866464	0	0.0309033	0.0238952	0	0.0850149	0.258856	0	0.0228772	0.113824	0.0735012	0	0
SYT6	chr1:114631913-114696472	0	0	0	0	0	0	0	0	0	0	0	0	0.0257582	0	0	0
BCAS2	chr1:115110180-115124265	2.20674	3.63675	2.19838	3.48781	2.49211	2.77829	2.70873	2.27939	1.97716	2.94093	1.9988	2.47531	1.57994	1.64298	3.02832	1.61037
DENND2C	chr1:115127195-115212732	0	0.152921	0	0.111186	0.122943	0.0813262	0.0567382	0.0310443	0.0314413	0.0229197	0.0541313	0.0318764	0	0	0.125744	0.0973609
AMPD1	chr1:115215719-115238239	0	0	0	0	0	0	0	0	0	0	0	0	0	0	0	0
NRAS	chr1:115247084-115259515	0.643741	1.37719	0.821251	1.32008	1.18315	1.02543	1.24746	0.641912	0.709578	1.87559	1.26625	0.670182	2.61176	2.05228	1.71658	0.862057
MAGI3	chr1:113933474-114228545	0.408347	1.27351	0.405432	1.22036	0.409963	0.607218	1.35471	0.603381	0.500076	0.255999	0.586234	0.687736	0.146383	0.0706508	2.28898	0.337056
SIKE1	chr1:115312104-115323308	0.367687	0.574575	0.314325	0.623231	0.390395	0.590084	0.660645	0.387069	0.303173	0.404891	0.355951	0.304428	0.47053	0.396614	0.579082	0.350157
SYCP1	chr1:115397454-115537990	0.220493	0.0200036	0.253293	0.142218	0.310975	0.32662	0.0848274	0.296633	0.191109	0.0307022	0.176951	0.183338	0.0394877	0	0.367599	0.0502017
CSDE1	chr1:115259536-115300671	9.46725	15.6645	9.05766	17.2027	13.1378	10.4759	12.5667	9.88046	9.04901	9.38609	10.6934	10.0605	11.2968	7.92585	12.6598	11.2667
TSHB	chr1:115572414-115576941	0	0	0	0	0	0	0	0	0	0	0	0	0	0	0	0
TSPAN2	chr1:115590632-115632121	0	0	0	0	0	0	0	0	0	0	0	0	0	0	0	0
NGF	chr1:115828536-115880857	0	0	0	0	0	0	0	0	0	0	0	0	0	0	0	0
CASQ2	chr1:116242625-116311426	0	0	0	0	0.0167052	0	0	0	0	0	0	0	0	0	0	0
NHLH2	chr1:116378998-116383747	0	0	0	0	0	0	0	0	0	0	0	0	0	0	0	0
SLC22A15	chr1:116519118-116612675	0	0.0207124	0	0.0419273	0	0	0	0	0	0.366632	0.0111048	0	0.525554	0.310357	0	0
MAB21L3	chr1:116654375-116677861	0.0170164	0.0477367	0.0418766	0.0706746	0.00822356	0.0702162	0.0537224	0.0510362	0.0418966	0.166692	0.000195885	0.0188752	0.0872154	0.159942	0.00439193	0.0387073
TRIM33	chr1:114935398-115053781	0.325669	0.577397	0.391942	0.755143	0.333474	0.556171	0.545272	0.397842	0.26743	0.665559	0.435362	0.479817	0.897256	0.773309	0.64227	0.49447
CD58	chr1:117057155-117113715	0.293303	0.382404	0.453861	0.274637	0.0430385	0.398727	0.359897	0.587853	0.359527	2.34506	0.44356	0.678703	2.12422	2.68705	0.19134	0.607249
ATP1A1	chr1:116915794-116947396	6.95705	2.40124	5.19091	1.6954	5.49691	5.8751	1.32047	6.39463	6.06555	9.82054	7.17134	8.02582	7.44757	5.85968	1.98886	7.56336
ATP1A1OS	chr1:116935486-116961244	0.0747979	0.0746479	0.196126	0.411861	0.225063	0.106504	0.166032	0.231254	0.128958	0.280877	0.276959	0.0892465	0.066439	0.161549	0.0595268	0.0827532
MIR320B1	chr1:117214370-117214449	0	0	0	0	0	0	0	0	0	0	0	0	0	0	0	0
CD2	chr1:117297085-117311851	0	0	0	0	0	0	0	0	0	0.0839228	0	0	0.297113	0.0527944	0	0
HIPK1	chr1:114471995-114520491	0.293465	0.730454	0.337369	0.909903	0.498185	0.539193	0.927403	0.516932	0.466119	1.34185	0.412897	0.330757	1.10675	1.12307	0.955278	0.507386
PTGFRN	chr1:117452688-117532972	1.13545	0.89898	1.07286	0.646285	1.09042	1.31434	0.990928	1.06143	1.09967	0.316388	1.32366	1.33087	0.208324	0.137363	0.774354	0.86622
CD101	chr1:117544381-117579167	0.694654	0.207098	0.332454	0.343873	1.57443	0.474497	0.128497	0.653607	0.762529	0.0247186	0.542816	0.648011	0.0141652	0.0468345	0.260939	0.748317
TTF2	chr1:117602948-117645491	0.0676188	0.230055	0.096435	0.226097	0.149555	0.135693	0.245634	0.129909	0.0837578	0.431369	0.0785928	0.0792601	0.371289	0.31837	0.257055	0.118286
MIR942	chr1:117637264-117637350	0	0	0	0	0	0	0	0	0	0	0	0	0	0	0	0
IGSF3	chr1:117117030-117210314	0.742059	0.504128	0.782249	0.486033	0.640068	0.813031	0.652415	0.739274	0.778977	0.123996	0.849585	0.693492	0.0639116	0.0272299	0.594382	0.734931
TRIM45	chr1:117653676-117664411	0.0968086	0.0679177	0.0499764	0.134362	0.0560484	0.123592	0	0.0493667	0.0482493	0	0.0129798	0.0504651	0.0719952	0	0.0137759	0.0922724
VTCN1	chr1:117686208-117753549	1.91695	0.405846	0.999806	1.44702	1.25087	1.18877	0.293355	0.865382	0.94092	0.105526	1.71767	1.60342	0.208077	0.0168701	0.333279	1.43317
MAN1A2	chr1:117910084-118068320	0.648067	0.99354	0.979623	1.15679	1.10891	0.882137	1.22944	1.07128	0.805961	0.547526	0.843501	0.840853	0.600823	0.489405	1.24806	0.854878
VANGL1	chr1:116184573-116240845	0.121767	0.0651309	0.174984	0.13457	0.136612	0.191453	0.112181	0.172377	0.126798	0.117473	0.227181	0.20841	0.110843	0.119164	0.140755	0.1911
TBX15	chr1:119425665-119532179	0	0	0	0	0	0	0	0	0	0.0134624	0	0	0.0307472	0.0128643	0	0
FAM46C	chr1:118148603-118171011	0.446619	1.11501	0.730323	1.42368	0.7002	1.07631	1.48965	1.1005	1.20141	0.257483	0.921443	1.13019	0.114825	0.00849033	1.31847	0.897882
HAO2	chr1:119911401-119936751	0	0	0	0	0	0	0	0	0	0	0	0	0	0	0	0
HSD3B2	chr1:119957553-119965662	0	0	0	0	0	0	0	0	0	0	0	0	0.0319823	0	0	0
HSD3B1	chr1:120049825-120057681	0	0	0	0	0	0	0	0	0	0	0	0	0	0	0	0
HSD3BP4	chr1:120106502-120115199	0	0	0	0	0	0	0	0	0	0	0	0	0.00656108	0.00533468	0	0
LOC644242	chr1:120140324-120141914	0	0	0	0	0	0	0	0	0	0	0	0	0	0	0	0
WDR3	chr1:118472371-118503049	0.332776	1.30677	0.405857	0.980624	0.639319	0.495814	0.801366	0.483507	0.59944	0.642926	0.655526	0.481847	0.58352	0.423966	1.00473	0.590839
SPAG17	chr1:118496287-118727848	0	0	0	0	0	0	0	0	0	0	0	0	0	0	0	0
WARS2	chr1:119573838-119683295	0.33302	1.07026	0.528267	1.16601	0.700028	0.514683	1.05869	0.523459	0.784132	0.345533	0.608648	0.637936	0.261728	0.334559	0.692644	0.44538
PHGDH	chr1:120254418-120286849	5.70331	1.96028	3.52675	2.75293	4.9502	5.64512	2.60404	3.44191	2.5961	0.496619	5.36565	4.30391	0.940688	0.414638	2.76062	2.3605
REG4	chr1:120336640-120354203	0	0	0	0	0	0	0	0	0	0	0	0	0	0	0	0
NBPF7	chr1:120377387-120387779	0	0	0.0185782	0	0	0	0	0	0	0.0230395	0	0	0	0.0435636	0.0241261	0
ADAM30	chr1:120436155-120439147	0	0	0	0	0	0	0	0	0	0	0	0	0	0	0	0
ZNF697	chr1:120161999-120190390	0.0296359	0.0725088	0.0648675	0.19421	0.106264	0.0850407	0.17164	0.070771	0.0301247	0.355579	0.0888699	0.0526909	0.565586	0.379134	0.17621	0.0215937
HMGCS2	chr1:120290618-120311555	0.104307	0	0.0163539	0	0	0.024526	0	0	0.0175416	0	0	0.0730418	0	0	0.0207419	0
HIST2H2BA	chr1:120906033-120914842	0	0.120798	0.0907971	0.305532	0	0	0.314592	0	0.0990352	0	0.104419	0	0.250307	0.110947	0	0.101232
FCGR1B	chr1:120926907-120935944	0	0.141039	0	0	0	0	0	0	0	0.937231	0	0	4.26139	2.2526	0	0
EMBP1	chr1:121260909-121313686	0	0	0	0	0	0	0	0	0	0.00805948	0	0	0.0350316	0.0268951	0	0
LOC100130000	chr1:143687129-143714180	0	0.0370507	0.0182211	0.0540667	0	0.0275101	0.0435968	0	0.079087	0.0228532	0.0209431	0.0208644	0	0	0	0.02099
FLJ39739_dup2	chr1:143718512-143744457	0	2.12271e-13	6.68572e-08	0	0	0	0	4.56872e-08	0	3.32864e-09	0	0	0	1.35602e-10	0	0
LOC100286793	chr1:143718512-143744587	0.0542022	0.214927	0.178607	0.148453	0.0826263	0.0495798	0.0810173	0.14551	0.0360241	0.0424972	0.193933	0.0369886	0	0.21266	0	0
FAM72B	chr1:120839004-120855681	0.0139563	0.0839877	0	0	0	0	0	0.00578835	0	0.129639	0.0207255	0	0.106147	0.0899924	0.11693	0.0794863
PPIAL4G	chr1:143767143-143767881	0.0887164	0.413711	0.0564358	0.226418	0.337336	0.0835417	6.94956e-05	5.20308e-05	0.0598504	0	0.150423	0.129104	0.0816881	0.254895	0.291325	0.0651162
SRGAP2P2	chr1:143915747-144094477	0.691757	0.442733	0.319282	0.892634	0.968426	0.710725	0.342661	0.732046	0.319188	6.46265	0.658302	0.408429	3.82923	4.59359	0.802142	0.978486
FAM72D	chr1:143896451-143913143	0.0137404	0.0951332	0	0.0258027	0	0	0.0216256	0.00567266	0.116816	0.107682	0	0	0.00154133	0.167083	0	0.00192666
PPIAL4B_dup2	chr1:144363461-144364246	0	0	0	0	1.02121e-06	0	0	0	0	0	0	4.76787e-07	0	0	1.13491e-06	0
PPIAL4A_dup3	chr1:144363586-144364246	0	0	0	0	0.0829657	0	0	0	0	0	0	0.306936	0	0	0.0885065	0
LOC728875_dup2	chr1:144480745-144521969	1.60505	0.786809	0.66028	1.04585	1.32738	1.44461	0.672997	1.05812	0.537766	0.45934	1.21059	0.754233	0.149097	0.356851	1.01124	1.34228
C1orf152	chr1:144610814-144612727	0	0	0	0.155871	0	0	0.0666618	0.0288894	0	0.885725	0	0	0.233803	0.657487	0	0
LOC728855_dup2	chr1:144300511-144340773	0.414591	0.548901	0.598481	1.3859	0.788624	0.626566	0.402797	0.791918	0.71793	0.333203	0.611057	0.453226	0.745836	0.275329	0.771916	0.344161
LOC728875_dup1	chr1:144300516-144341755	0	0.0242333	1.37514e-08	1.15258e-16	6.49763e-09	0	2.37404e-22	8.10544e-19	4.32746e-09	2.62986e-08	1.13197e-07	3.37464e-07	1.81547e-08	0	1.58109e-29	2.34939e-07
NBPF9	chr1:144614958-144828810	0.291032	0.451259	0.315333	0.389649	0.217784	0.303479	0.426377	0.37019	0.273828	2.17614	0.25287	0.292928	2.02437	2.56582	0.258371	0.252454
LOC653513	chr1:144676436-144680025	0.072186	0.569432	0.137768	0.0647176	0.277835	0	0.717175	0.342017	0.143281	3.23371	0.210225	0.205311	2.3754	1.58663	0.745754	0.0519276
SEC22B	chr1:145096406-145116922	6.08487	12.462	6.03502	9.54003	8.48768	6.93206	16.7285	8.84422	8.99265	8.60426	5.91827	6.66369	9.38374	6.94757	14.6074	7.02745
NOTCH2NL	chr1:145209110-145285912	0.704526	0.235344	0.522967	0.499213	0.559794	0.805031	0.641655	0.941716	0.433263	1.86565	0.533327	0.506703	1.77787	2.11359	0.32218	0.781109
GDAP2	chr1:118406106-118472302	0.193083	0.302168	0.276666	0.292537	0.213734	0.227867	0.308642	0.209994	0.204204	0.333651	0.215491	0.171735	0.24851	0.277553	0.189507	0.314053
HFE2	chr1:145413190-145417545	0	0	0	0	0	0	0	0	0	0	0	0	0.0296204	0	0	0
TXNIP	chr1:145438461-145442628	6.17167	4.4226	2.22284	6.39806	2.94576	8.68491	3.35744	4.12731	4.70973	23.7618	10.3633	10.5196	24.5038	23.6938	0.682125	19.5511
POLR3GL	chr1:145456235-145470387	0.90959	0.657734	0.939838	0.571949	0.853755	0.744321	0.455552	0.409035	0.890417	1.58312	1.15164	1.37829	1.33459	1.21551	0.273584	0.903444
ANKRD34A	chr1:145470507-145475647	0	0.0109564	0	0	0.0154538	0	0	0.0130802	0.0127685	0.0316427	0.0140638	0	0	0.0731288	0.0144184	0.0274354
LIX1L	chr1:145477084-145499091	0.351855	0.278983	0.221129	0.364466	0.5159	0.28396	0.313838	0.407359	0.275716	0.403088	0.330377	0.387857	0.533554	0.420494	0.395213	0.251712
NBPF10	chr1:145293370-145368684	0.463701	0.466927	0.239659	0.501774	0.169409	0.364352	0.534726	0.401524	0.358116	3.99907	0.276914	0.17756	5.07457	5.75945	0.298667	0.245456
RBM8A	chr1:145507556-145513535	1.01601	2.45789	1.21559	2.05909	1.4026	1.37424	1.63276	0.884451	1.07277	1.72848	1.08125	1.33502	1.75873	1.44149	2.38496	1.02008
GNRHR2	chr1:145509819-145516076	0.132554	0.236183	0.0554772	0.0838782	0.0722584	0.0731093	0.251349	0.0745062	0.106768	0.135198	0.139659	0.109952	0.0910302	0.166374	0.336928	0.0966317
PEX11B	chr1:145516164-145523732	1.12161	2.19911	1.05364	1.62536	1.46493	1.69627	1.57803	1.2479	0.935879	1.10675	1.91307	1.7805	1.61972	1.00752	1.95239	1.2694
ANKRD35	chr1:145549208-145568526	0	0.0830711	0	0.0293375	0.0128648	0	0.0118073	0	0	0.0266735	0.011706	0	0.0142154	0	0.0361449	0
PIAS3	chr1:145575987-145586546	0.379123	1.09966	0.36032	0.718582	0.420133	0.339197	0.794438	0.397203	0.267403	0.643383	0.439694	0.43488	0.513288	0.536057	1.18994	0.317504
NUDT17	chr1:145586492-145589435	0.488212	0.063816	0.100068	0.144718	0.0854053	0.21152	0.0805618	0.181638	0.0363323	0.0437722	0.117637	0.114849	0	0.162409	0.287809	0
POLR3C	chr1:145592604-145610884	0.730179	0.711928	0.484883	1.06834	0.778365	0.712444	0.506202	0.547786	0.631171	0.910789	0.552842	0.47912	0.942225	0.661902	0.662095	0.640038
RNF115	chr1:145611035-145688776	0.937104	1.41947	1.43726	1.46644	1.53122	1.58528	1.21529	1.02183	0.982306	1.1372	1.17311	1.80173	1.2868	1.14814	1.23292	1.83587
NOTCH2	chr1:120454175-120612317	0.724509	0.538954	0.561706	0.562357	0.474893	0.688166	0.678378	0.603988	0.503377	3.10613	0.86415	0.788915	3.43521	3.28623	1.0644	0.871266
CD160	chr1:145695797-145715565	0	0	0.0222444	0	0	0	0	0	0	0	0	0	0.0320198	0.0255537	0	0
PDZK1	chr1:145727665-145764206	0	0	0	0	0	0	0	0	0	0	0	0	0	0	0	0
GPR89C_dup2	chr1:145883867-145924049	0.909337	0.735391	0.578891	0.609846	0.547935	0.713917	0.792625	1.11328	0.920405	0.824349	0.558427	0.774138	0.924178	0.588178	0.393966	0.795496
PDZK1P1_dup2	chr1:145924387-145942619	0	0	0	0	0	0	0.00620824	0	0	0	0	0	0	0	0	0
ITGA10	chr1:145524989-145543868	0.0354948	0.0071997	0.0219148	0.0429283	0.0462885	0.0453164	0.0353016	0.0161667	0	0.0283556	0.0513948	0.0496742	0.0104683	0	0.0463964	0.0336621
LOC728989	chr1:146490894-146514599	0	0	0	0	0	0	0.0834334	0.0381741	0	0.437012	0	0.0401495	0.0976077	0.568979	0.0440437	0
GPR89A	chr1:145764594-145827103	0.15676	0.203603	0.167681	0.258811	0.22409	0.127657	0.176542	0.129811	0.193402	0.0264389	0.0265729	0.177467	0.235148	0.102477	0.214928	0.10422
PDIA3P	chr1:146649429-146651528	1.63243	2.97961	2.00109	2.01265	2.47416	1.7811	3.23086	2.33042	2.08337	3.33899	2.18611	2.21829	2.49596	2.78757	2.46255	1.82286
PRKAB2	chr1:146626684-146644129	0.15695	0.153971	0.0717145	0.057058	0.0935895	0.172966	0.0874341	0.14437	0.0946878	0.233519	0.108449	0.105413	0.147711	0.224948	0.138761	0.151461
CHD1L	chr1:146714290-146767443	0.910904	1.29478	0.901748	1.45841	0.897351	1.08786	0.91823	0.856142	0.718708	1.42209	0.805506	0.888056	1.05482	0.82522	0.933557	0.893565
LOC100289211	chr1:146853913-146989699	0	0	0	0	0	0	0	0	0	0	0	0	0	0	0.016121	0
FMO5	chr1:146655883-146697230	1.18929	0.315402	0.362549	0.108987	0.151635	1.09513	0.318286	0.468757	0.715509	0.100613	0.572765	0.898971	0.0960066	0.0779308	0.300199	1.34975
ACP6	chr1:147119167-147142634	0.431839	0.304022	0.532736	0.55639	0.767298	0.241795	0.405372	0.55807	0.471043	0.286883	0.442864	0.37347	0.249964	0.134414	0.195663	0.510074
GJA5	chr1:147228331-147245484	0	0	0	0	0	0	0	0	0	0	0.0145864	0	0	0	0	0
GJA8	chr1:147374945-147381395	0	0	0	0	0	0	0	0	0	0	0	0	0	0	0	0
NBPF11_dup2	chr1:146032541-146082633	0.362401	0.244019	0.237177	0.488683	0.152138	0.438759	0.417353	0.370319	0.37663	2.11048	0.263017	0.240702	2.12209	2.53418	0.186101	0.317368
NBPF24_dup2	chr1:146034018-146068245	0.0289252	0.0829879	0.044095	0.0487048	1.32802e-06	2.93209e-08	0.0611799	0.0517062	9.95655e-08	0.480988	0.0224938	4.53645e-08	0.823544	0.710058	0.0663449	0.0447203
PDZK1P1_dup1	chr1:147466093-147484331	0	0	0	0	0	0	0.00620824	0	0	0	0	0	0	0	0	0
GPR89B	chr1:147400505-147465753	0.0629454	0	0	0.0585576	0.0247331	0.028621	0	0.0218256	0	0.0244162	0	0.045704	0	0.0235784	0	0
GPR89C_dup1	chr1:147425566-147465755	0	0	0	0	0	0	0	0	0	0	0	0	0	0	0	0
FLJ39739_dup1	chr1:147906021-147931980	0.348167	0.440484	0.398651	0.355474	0.229831	0.44651	0.311716	0.145925	0.858324	0.559922	0.32968	0.336922	0.297073	0.619888	0.230207	0.191313
PPIAL4B_dup1	chr1:147954634-147955419	0	0	0	0	0	0	0	0	0	0	0	0	0	0	0	0
PPIAL4A_dup2	chr1:147954759-147955419	0	0	0	0	0	0	0	0	0	0	0	0	0	0	0	0
BCL9	chr1:147013181-147098015	0.174567	0.336148	0.182641	0.280099	0.120905	0.160006	0.410509	0.191113	0.254544	0.0848296	0.19466	0.165619	0.178081	0.10941	0.308305	0.115698
PPIAL4D	chr1:148201751-148202536	0	0.00271937	0	0.0111059	0.00454285	0	0	0	2.76527e-05	0	0.0432906	2.52705e-05	0	0.00779644	0	0
NBPF14	chr1:148003641-148025848	0.731121	1.08289	0.31776	0.862282	0.234975	0.443397	0.737028	0.556485	0.780106	7.41778	0.331942	0.296914	9.51718	10.9206	0.540956	0.555679
PPIAL4E	chr1:148644010-148644795	0	0	0	0	0	0	0	0	0	0	0.00319943	0	0	0	0	0
NBPF16_dup2	chr1:148739441-148758311	0.343174	0.62437	0.277355	0.684944	0.200722	0.417694	0.419357	0.444693	0.41388	2.96252	0.244115	0.293311	3.21413	3.78869	0.371289	0.361314
PPIAL4F	chr1:148806014-148806799	0	0.00271937	0	0.0111059	0.00454285	0	0	0	2.76527e-05	0	0.0432906	2.52705e-05	0	0.00779644	0	0
LOC645166	chr1:148928285-148953054	0.430584	0.264211	0.0676461	0	0.379179	0.525438	0.264753	0.262523	0.143463	0.28431	0	0.142489	0	0	0.330048	0
NBPF11_dup1	chr1:147574322-147624469	0.201571	0.324301	0.106037	0.17445	0.062011	0.0913712	0.200309	0.110575	0.269252	1.73086	0.121868	0.0442165	1.87077	2.45594	0.119783	0.21322
NBPF24_dup1	chr1:147575799-147610081	9.58078e-08	0.0481454	2.62082e-08	9.01194e-07	8.07115e-09	0.032048	5.26392e-07	1.7887e-07	2.07868e-09	4.42221e-08	8.91127e-09	1.10156e-06	0.0913764	0.0320654	1.09513e-09	1.00874e-08
FCGR1C	chr1:149369293-149378297	0.129184	0.0863645	0.0277132	0.0790085	0	0	0.0334592	0	0	2.40503	0	0	4.35332	3.24962	0	0
HIST2H2BF_dup2	chr1:149397113-149399229	0.407648	0.259281	0.0256348	0.336916	0.190465	0.11267	0.941806	0.111652	0.0823939	0.669506	0.150253	0.115592	0.218819	0.48291	0.330928	0.176893
PPIAL4A_dup1	chr1:149553002-149553662	0	0	0	0	0	0	0	0	0	0	0	0	0	0	0	0
PPIAL4C	chr1:149553002-149553787	0	0	0	0	0	0	0	0	0	0	0	0	0	0	0	0
LOC728855_dup1	chr1:149576452-149616786	1.0546	0.67957	1.19104	0.938656	0.892591	1.09449	0.900331	1.3272	1.06143	0.89829	1.20066	1.07344	0.592587	0.339722	0.474776	0.60548
HIST2H2BF_dup1	chr1:149754244-149783928	0.204127	0.141751	0.0255831	0.0908235	0.0317427	0.0560171	1.0013	0.110734	0.0275125	0.334267	0.150088	0	0.403181	0.12073	0.13203	0.0589677
FCGR1A	chr1:149754249-149764074	0	0.0857252	0.0165712	0.115079	0	0	0	0	0	1.40124	0.01869	0	4.1309	3.00586	0.0426257	0
HIST2H3D	chr1:149784779-149785236	0.00949059	0.09691	0.100372	0.43584	0	0	0.244099	0	0	0.276421	0	0	0.139018	0.252256	0.0475303	0
HIST2H4B	chr1:149804220-149804616	0.103562	0.133742	0.0682624	0.366616	0	0.380749	0.489741	0.069433	0.0702039	0.0871579	0	0.327259	0.417533	0	0.323046	0.146561
HIST2H3A_dup2	chr1:149812258-149812765	0.560153	0.0441714	0.0458388	0	0	0	0.111819	0	0	0	0	0	0	0	0.0337327	0
HIST2H2AA4_dup2	chr1:149813784-149814318	1.47366	3.76837	0.929919	3.21525	0.811018	1.01529	2.48808	0.831154	0.524909	1.40477	0.969271	0.810228	2.71523	1.45159	1.41002	0.833671
HIST2H2BC	chr1:149821758-149822340	0.264762	0.0761735	0	0.119067	0	0	0.283773	0.0868962	0	0	0	0	0	0	0.0949472	0
HIST2H2AA4_dup1	chr1:149822627-149823161	1.47366	3.76837	0.929919	3.21525	0.811018	0.769476	2.48808	0.831154	0.524909	1.40477	0.969271	0.810228	2.71523	1.45159	1.41002	0.833671
HIST2H3A_dup1	chr1:149824180-149824687	0.560153	0.0441714	0.0458388	0	0	0	0.111819	0	0	0	0	0	0	0	0.0337327	0
HIST2H4A	chr1:149832329-149832725	0.103562	0.133742	0.0682624	0.366616	0	0.380749	0.489741	0.069433	0.0702039	0.0871579	0	0.327259	0.417533	0	0.323046	0.146561
HIST2H2BE	chr1:149856009-149858232	0.709823	1.31	0.35535	1.31841	0.351555	0.310134	0.875126	0.409586	0.281542	0.646162	0.222933	0.105927	0.602371	0.784705	0.918925	0.545759
HIST2H2AC	chr1:149858524-149858961	0.0867104	0.0676752	0.0567982	0.368933	0.0818302	0.0589472	0.0317532	0	0.00775655	0.0266614	0.0653522	0.018418	0.0166808	0.11566	0.321537	0.071428
HIST2H2AB	chr1:149859018-149859466	0	0	0	0	0	0	0	0	0	0.288564	0	0	0	0	0	0
BOLA1	chr1:149871154-149872348	1.60261	2.32345	1.7258	1.98221	1.78782	1.74647	1.07948	2.2162	1.39978	0.308385	1.47288	0.937594	0.706411	0.621384	0.801225	1.01323
SV2A	chr1:149874871-149889434	0	0	0	0	0	0	0	0	0	0	0	0	0.0136541	0.0117587	0	0
SF3B4	chr1:149895208-149900144	1.54644	2.52337	1.17819	2.59921	1.55665	2.0134	2.41337	1.42907	1.45759	2.63241	1.69659	2.31927	2.82712	2.5667	2.90209	1.38741
MTMR11	chr1:149900542-149908791	0	0	0	0	0	0	0	0	0	0.0205597	0	0	0	0.0641997	0	0
NBPF15	chr1:148558187-148596267	0.469409	0.458842	0.138938	0.336628	0.242966	0.340173	0.389931	0.379444	0.0712743	2.66666	0.189556	0.113611	1.86327	2.03264	0.319907	0.388505
NBPF16_dup1	chr1:148577356-148596267	0.000134791	0.169597	0.0675467	1.03857e-07	1.41129e-07	7.23554e-07	2.86113e-07	1.04733e-12	0.396181	0.517618	1.74801e-06	0.0926742	1.6288	2.38087	5.28336e-05	2.22456e-06
VPS45	chr1:150039341-150117505	0.605088	1.17868	0.589435	1.07748	1.07288	0.987859	1.09647	1.11392	0.623235	0.866335	0.716964	0.774025	0.88302	0.713072	1.29556	0.723378
PLEKHO1	chr1:150122169-150131825	0	0.2376	0.0420858	0.220847	0	0	0.0255227	0	0	6.22469	0	0.0244311	6.76097	6.15515	0.0260631	0
OTUD7B	chr1:149912231-149982686	0.127254	0.23336	0.147483	0.203459	0.152783	0.156985	0.245452	0.108107	0.158248	0.0698112	0.114545	0.139947	0.0353072	0.0147322	0.170545	0.113148
CA14	chr1:150230217-150237480	0.0348337	0.0663891	0.0218601	0.0627202	0.0273962	0.0327858	0	0.0237884	0	0	0	0	0	0	0	0
ANP32E	chr1:150190716-150208504	0.733207	1.32527	0.737902	0.659723	1.00206	1.08976	1.13776	0.594846	0.755884	1.18885	0.802299	0.563102	1.47965	1.46542	1.52361	0.642043
APH1A	chr1:150237798-150241532	7.57509	7.25416	5.53959	6.3799	7.14024	7.29816	6.87564	5.45157	5.22101	9.92237	7.61445	7.51747	11.7368	8.03492	6.30207	6.41845
C1orf54	chr1:150245182-150253335	0.125975	0.176565	0.162214	0.224783	0.100358	0.231821	0.198639	0	0	2.30921	0.0931695	0.35479	1.49783	1.60579	0	0.0933268
MRPS21	chr1:150266268-150280819	4.78257	8.80376	4.94654	10.9099	3.27225	3.6812	5.15457	5.33514	5.28357	6.08485	4.48418	5.54348	4.77445	4.4584	5.14099	4.07368
C1orf51	chr1:150255228-150259501	0.037533	0.0241783	0.0240774	0.0339034	0.0600764	0.0725181	0.201708	0.0773001	0	0.0605695	0.111216	0.0794244	0.0336689	0.0862786	0.0299203	0.0818963
PRPF3	chr1:150293927-150325704	0.298713	0.458789	0.161377	0.453522	0.224173	0.337607	0.248707	0.364377	0.229663	0.806275	0.256005	0.243921	1.20729	0.94351	0.633565	0.325339
TARS2	chr1:150459919-150479749	0.557004	0.676325	0.44599	0.826506	0.611804	0.739353	0.539208	0.679893	0.593111	1.02766	0.491135	0.476875	0.88284	1.07677	0.675764	0.232841
LOC388692	chr1:149279475-149291742	0.0299067	0.0215122	0.0123731	0.0412945	0.0502152	0.0331553	0.0521547	0.0372566	0.0401165	0.164379	0.0398237	0.0175391	0.168603	0.155725	0.0473309	0.0464214
ECM1	chr1:150480486-150486265	0.262888	0.0677374	0.0920953	0	0	0.132699	0.0833686	0	0	0.898678	0.0989018	0.0194769	0.474586	0.45432	0	0.0202352
ADAMTSL4	chr1:150521897-150533412	0.106973	0.0718606	0.0597081	0.12128	0.0189934	0.0327771	0.105962	0.0634131	0.0653941	1.51467	0.0231988	0.0680398	1.09428	1.07624	0.0625173	0.0813581
MIR4257	chr1:150524404-150524490	0	0	0	0	0	0	0	0	0	0	0	0	0	0	0	0
RPRD2	chr1:150336989-150449041	0.576049	0.89011	0.526047	1.05395	0.616336	0.673106	0.933456	0.611156	0.670367	0.639384	0.662155	0.666589	0.454079	0.465255	1.15063	0.609411
GOLPH3L	chr1:150618700-150669672	1.72953	4.41364	2.16553	4.1189	2.5573	2.97889	5.13967	2.79255	2.68248	1.23705	2.46115	2.51413	1.14268	0.470291	4.73855	3.30633
HORMAD1	chr1:150670534-150693364	0	0	0	0	0	0	0	0.0866606	0	0.0933431	0.0911881	0	0.029714	0.120866	0.111028	0
CTSS	chr1:150702671-150738433	2.81536	4.57615	3.7532	3.65643	4.87281	4.17474	3.11358	4.3231	3.50385	50.0094	4.61424	3.73663	47.4207	52.2856	1.43459	3.25525
CTSK	chr1:150768683-150780917	0	0.666874	0.0201883	0.19932	0	0	0.0478062	0	0	11.4485	0.0467068	0.0227605	4.24579	6.11644	0.128595	0.0463838
MCL1	chr1:150547026-150552214	7.25889	7.04163	3.94516	7.33268	5.11198	8.47418	7.98055	5.41291	4.25783	21.4928	6.99275	6.70275	17.5103	17.2523	5.8371	6.3578
ENSA	chr1:150594598-150602098	16.421	19.4686	11.067	18.0205	14.4373	13.0837	14.1295	13.3336	7.85233	7.02301	14.4734	13.657	8.53979	5.28346	15.1335	12.1779
LASS2	chr1:150937648-150947440	8.75849	3.66203	5.49769	4.56727	5.71019	6.58892	3.91641	5.86204	5.20907	6.0086	8.4125	8.14426	6.14886	5.3596	3.06725	5.74392
ANXA9	chr1:150954498-150968114	0.564209	0.145678	0.282771	0.394465	0.382568	0.358681	0.360047	0.481368	0.359702	0.0741488	0.463711	0.388762	0.0809159	0.0926745	0.421963	0.352246
SETDB1	chr1:150898814-150937220	0.371591	0.998	0.318495	1.07676	0.477903	0.447406	1.00564	0.352175	0.438922	0.764389	0.522655	0.423066	0.900362	0.800199	0.822348	0.4049
ARNT	chr1:150782180-150849244	0.623487	0.827371	0.479539	0.901034	0.667805	0.69456	0.88781	0.649565	0.572919	1.4533	0.680951	0.613073	1.54668	1.23665	1.02161	0.512386
PRUNE	chr1:150980972-151008189	0.517794	0.579359	0.365932	0.691126	0.842821	0.840502	0.40122	0.63801	0.496767	0.368146	0.514634	0.739005	0.542484	0.430966	0.588525	0.493034
BNIPL	chr1:151009028-151020076	0.658659	0.263716	0.110422	0.262831	0.0222449	0.252144	0.214009	0.0873049	0.118548	0.122359	0.130185	0.201646	0.10119	0.0980801	0.268174	0.0924804
MLLT11	chr1:151032150-151040973	0.119641	0.136487	0.0572987	0.0832442	0.0464709	0.0275418	0.161248	0.0206314	0.0615848	0.0234952	0.0220751	0.0434181	0.027321	0.0894753	0.121372	0.0660216
GABPB2	chr1:151043079-151091007	0.112788	0.0911394	0.106623	0.407526	0.130475	0.21304	0.191614	0.174049	0.0941124	0.178471	0.101866	0.101935	0.280895	0.377946	0.385432	0.101205
FAM63A	chr1:150969300-150980854	1.72593	1.68059	1.16142	2.24915	1.32357	1.45741	1.50623	1.34562	0.84993	0.473342	1.28866	1.2602	0.629082	0.284933	1.53788	0.872628
C1orf56	chr1:151020258-151023871	0.372358	0.314328	0.566918	0.297918	0.766537	0.469354	0.271103	0.546094	0.46891	0.0976298	0.559732	0.290349	0.0765425	0.216264	0.118936	0.568364
CDC42SE1	chr1:151023446-151032125	2.60179	3.7196	2.36324	3.38709	2.81064	3.14615	4.02059	3.92262	3.21019	5.66796	2.39258	2.92655	4.98664	4.93321	4.06194	2.77621
VPS72	chr1:151148933-151162640	1.29757	1.83486	1.23947	1.50989	1.34989	1.01993	1.6249	1.28955	0.822311	1.38241	0.76798	1.1116	1.61149	0.833164	1.37412	1.02156
TNFAIP8L2	chr1:151129104-151132225	0.285438	0.626333	0.599219	1.41082	0.379687	0.590736	0.28973	0.492621	0.541981	1.25744	0.475684	0.399448	1.66031	1.26368	0.259546	0.599167
TNFAIP8L2-SCNM1	chr1:151129104-151142773	0.646851	1.63837e-06	5.40441e-09	0.379721	4.00974e-32	2.49436e-17	0.249481	9.18977e-07	8.09278e-14	2.71724e-05	1.00428e-09	3.57564e-07	0.793346	0.183142	2.78268e-07	6.80628e-06
SCNM1	chr1:151138497-151142773	1.89433e-06	0.6105	0.240057	0.276534	0.530487	0.36948	0.240959	0.346172	0.423242	0.788179	0.5091	0.22873	0.133927	0.595147	0.705319	0.253473
LYSMD1	chr1:151132223-151138424	0.21131	0.21948	0.103911	0.125661	0.0747618	0.213347	0.171142	0.246777	0.197174	0.2278	0.293685	0.0733175	0.0664077	0.142902	0.26882	0.196701
TMOD4	chr1:151142462-151148547	0	0	0	0	0	0	0	0	0	0	0	0	0	0	0	0
SEMA6C	chr1:151104162-151119140	0.0824285	0.0488102	0	0	0.0161396	0	0.0144656	0	0.0528795	0.0877095	0	0	0.0674455	0.0154393	0	0
PSMD4	chr1:151227196-151239954	5.44754	6.74447	3.76934	6.41518	5.54903	4.81984	4.62783	4.83971	3.84631	4.56606	4.82001	4.4348	6.55288	5.1413	5.64053	4.07723
RFX5	chr1:151313115-151319769	0.664479	1.18817	0.665068	1.43983	0.709102	0.71014	1.03409	0.650601	0.53309	1.68418	0.823431	0.898051	2.11387	1.52178	1.35428	0.558544
SELENBP1	chr1:151336779-151345164	28.077	68.8862	24.1918	81.2739	30.3631	24.0682	68.9344	25.1935	18.8387	12.1905	28.6736	31.3899	15.8742	3.02441	71.945	17.9055
PSMB4	chr1:151372040-151374412	13.7957	15.0477	9.27864	16.9286	14.1031	10.7488	14.3266	11.8421	11.153	11.2894	11.3323	11.6389	12.9592	9.69539	8.03219	9.07359
PDE4DIP	chr1:144851423-145076186	0.87722	1.57815	0.689808	1.14648	0.879407	0.881719	1.76346	0.924861	0.75517	7.48761	0.925786	0.615719	7.24622	5.84444	2.16735	0.655431
CGN	chr1:151483861-151511167	0.222759	0.274545	0.168421	0.234075	0.252357	0.416941	0.0977839	0.288162	0.285036	0.0169427	0.326353	0.246072	0.0451074	0	0.0913766	0.344239
PIP5K1A	chr1:151171020-151222007	0.650028	1.37901	0.544929	1.00316	0.64381	0.827369	1.09886	0.679118	0.807137	1.13996	0.755848	0.729215	1.26933	0.942496	1.30863	0.704167
TUFT1	chr1:151512780-151556059	1.05471	0.749692	0.919132	1.55804	1.11004	1.96973	0.912135	1.14261	0.794315	0.504864	1.13072	1.08104	0.50242	0.155081	1.31406	1.33248
MIR554	chr1:151518271-151518367	0	0	0	0	0	0	0	0	0	0	0	0	0	0	0	0
CELF3	chr1:151672533-151689290	0	0	0	0	0	0.054397	0	0	0	0	0	0	0	0	0	0
RIIAD1	chr1:151694012-151702082	0	0.5221	0.204562	0.849756	0	0.142986	0	0.212614	0	0	0.339295	0.45181	0	0	0.253196	0
MRPL9	chr1:151732122-151736040	3.08301	5.55595	2.38558	4.92713	3.29598	3.86693	2.87368	4.06369	3.48255	1.62569	3.58037	3.42019	1.83252	1.16587	4.76891	3.35075
OAZ3	chr1:151735444-151743806	1.37625	3.34318	1.06286	3.59473	0.959648	1.71779	2.6569	1.37866	0.918215	0.124345	0.979482	1.19881	0.944403	0.0609209	4.24191	1.66264
SNX27	chr1:151584661-151671559	0.822914	0.759175	0.594476	0.843852	0.692954	0.83364	0.978761	0.740413	0.587961	1.4231	0.774985	0.699139	1.28747	1.39768	0.772593	0.741793
LINGO4	chr1:151772764-151777882	0.0533323	0.0764412	0.0321226	0.0486448	0	0.104943	0.0588092	0.0714627	0.0344148	0	0.0955458	0.0898382	0.0227983	0	0.541457	0.07505
ZNF687	chr1:151254790-151264381	0.380241	0.680538	0.489459	0.718316	0.486858	0.551693	0.515335	0.561539	0.418719	1.00234	0.504177	0.565219	1.18758	0.845163	0.877313	0.399719
PI4KB	chr1:151264272-151300191	1.41833	1.88942	1.27091	2.36098	1.59627	1.7722	1.71142	1.50821	1.33986	2.45618	1.22775	1.43514	2.81715	1.81939	2.7332	1.00591
C2CD4D	chr1:151810338-151813033	0.577511	0.0827858	0	0.34902	0.304408	0.418551	8.7641e-07	0.104066	0.206122	0	0.180345	0.246882	0.0487386	0	0	0.293896
LOC100132111	chr1:151810944-151816641	9.09213e-09	0.442794	0.220417	0.23585	0.212664	0.379932	0.419623	0.210279	0.119399	0.147843	0.260013	0.127575	0.155656	0	0.533087	0.148649
THEM5	chr1:151819576-151826173	0	0.0626185	0	0.0930547	0	0	0	0	0	0	0.0363915	0	0	0	0.0408677	0
RORC	chr1:151778546-151804348	3.62421	2.54354	1.57752	1.76636	1.50632	3.42935	2.62674	2.93931	2.83965	0.427946	3.30288	3.36474	0.366577	0.014953	3.57957	3.48894
S100A10	chr1:151955385-151966714	2.1657	0.975331	0.213063	1.14363	0.838984	1.84793	0.258756	0.735869	0.238843	17.8567	0.148545	0.297739	15.028	13.5808	0.263122	1.95025
S100A11	chr1:152004981-152009511	20.9536	30.0501	12.1278	24.2206	23.2776	20.4924	22.1937	18.4422	14.9654	95.4342	13.8983	15.6455	117.979	97.2735	16.4086	14.1863
TCHHL1	chr1:152056619-152061540	0	0	0	0	0	0	0	0	0	0	0	0	0	0	0	0
TDRKH	chr1:151744040-151763010	0.99892	1.29411	0.932509	1.09787	1.03545	1.51091	1.24578	1.41078	0.975672	0.621897	1.13937	1.03603	0.521078	0.177645	1.19981	1.2356
RPTN	chr1:152126070-152131704	0	0	0	0	0	0	0	0	0	0	0	0	0	0	0	0
HRNR	chr1:152184557-152196669	0	0	0	0	0	0	0	0	0	0.00543983	0	0	0	0	0	0
FLG	chr1:152274650-152297679	0	0	0	0	0	0	0.00257175	0	0	0.00864104	0	0	0.00313779	0.00270015	0	0
FLG2	chr1:152321212-152332482	0	0	0	0	0	0	0	0	0	0	0	0	0	0	0	0
CRNN	chr1:152381718-152386750	0	0	0	0	0	0	0	0	0	0	0	0	0	0	0	0
LCE5A	chr1:152483319-152484653	0	0	0	0	0	0	0	0	0	0	0	0	0	0	0	0
CRCT1	chr1:152486977-152488481	0	0	0	0	0	0	0	0	0	0	0	0	0	0	0	0
LCE3E	chr1:152538129-152539248	0	0	0	0	0	0	0	0	0	0	0	0	0	0	0	0
LCE3D	chr1:152551859-152552980	0	0	0	0	0	0	0	0	0	0	0	0	0	0	0	0
LCE3C	chr1:152573137-152573562	0	0	0	0	0	0	0	0	0	0	0	0	0	0	0	0
LCE3B	chr1:152586286-152586574	0	0	0	0	0	0	0	0	0	0	0	0	0	0	0	0
LCE3A	chr1:152595309-152595579	0	0	0	0	0	0	0	0	0	0	0	0	0	0	0	0
LCE2D	chr1:152635871-152637135	0	0	0	0	0	0	0	0	0	0	0	0	0	0	0	0
LCE2C	chr1:152647770-152649049	0	0	0	0	0	0	0	0	0	0	0	0	0.109545	0	0	0
LCE2B	chr1:152658598-152659876	0	0	0	0	0	0	0	0	0	0	0	0	0	0	0	0
LCE2A	chr1:152670839-152671918	0	0	0	0	0	0	0	0	0	0	0	0	0	0	0	0
LCE4A	chr1:152681522-152681910	0	0	0	0	0	0	0	0	0	0	0	0	0	0	0	0
C1orf68	chr1:152691997-152692905	0	0	0	0	0	0	0	0	0	0	0	0	0	0	0	0
KPRP	chr1:152730505-152734529	0	0	0	0	0	0	0	0	0	0	0	0	0	0	0	0
LCE1F	chr1:152748847-152749445	0	0	0	0	0	0	0	0	0	0	0	0	0	0	0	0
LCE1E	chr1:152758752-152760901	0	0	0	0	0	0	0	0	0	0	0	0	0	0	0	0
LCE1D	chr1:152769226-152770657	0	0	0	0	0	0	0	0	0	0	0	0	0	0	0	0
LCE1C	chr1:152777310-152779107	0	0	0	0.0787527	0	0	0	0	0	0	0	0	0	0	0	0
LCE1B	chr1:152784446-152785585	0	0	0	0	0	0	0	0	0	0	0	0	0	0	0	0
LCE1A	chr1:152799948-152800573	0	0	0	0	0	0	0	0	0	0	0	0	0	0	0	0
LCE6A	chr1:152815329-152816459	0	0	0	0	0	0	0	0	0	0	0	0	0	0	0	0
SMCP	chr1:152850797-152857523	0	0	0	0	0	0	0	0	0	0	0	0	0	0	0	0
IVL	chr1:152881038-152884362	0	0.0124723	0	0	0	0	0	0	0	0	0	0	0	0	0	0
SPRR4	chr1:152943127-152945069	0	0	0	0	0	0	0	0	0	0	0	0	0	0	0	0
SPRR1A	chr1:152956563-152958290	0	0	0	0	0	0	0.0735556	0	0	0	0.072726	0	0	0	0	0.0718472
SPRR3	chr1:152974222-152976332	0	0	0	0.0477262	0	0	0	0	0	0	0	0	0	0	0	0
SPRR1B	chr1:153003678-153005376	0.105371	0	0.131895	0	0	0	0	0.0709373	0	0	0.0758446	0	0	0	0	0
SPRR2D	chr1:153012200-153013594	0	0	0.0579934	0	0	0.0856471	0	0	0	0	0	0	0	0	0	0
SPRR2A	chr1:153028595-153029988	0	0	0	0	0	0	0	0	0	0	0	0	0	0	0	0
SPRR2B	chr1:153042717-153044084	0	0	0	0	0	0	0	0	0	0	0	0	0	0	0	0
SPRR2E	chr1:153065610-153067001	0	0	0	0.171416	0	0	0	0	0	0	0	0	0	0	0	0
SPRR2F	chr1:153084612-153085989	0	0	0	0	0.0732251	0	0.0702738	0.0634738	0	0.0746858	0	0	0	0	0	0
SPRR2C	chr1:153112593-153113969	0	0	0	0	0	0	0	0	0	0	0	0	0	0	0	0
SPRR2G	chr1:153122057-153123427	0	0.0657496	0	0	0.0769208	0	0	0	0	0	0.0721365	0	0	0	0	0
LELP1	chr1:153175918-153177596	0	0	0	0	0	0	0	0	0	0	0	0	0	0	0	0
PRR9	chr1:153190059-153191793	0	0	0	0	0	0	0	0	0	0	0	0	0	0	0	0
LOR	chr1:153232178-153234600	0	0	0	0	0	0	0	0	0	0	0	0	0	0	0	0
PGLYRP3	chr1:153270337-153283194	0	0	0	0	0	0	0	0	0	0	0	0	0	0	0	0
PGLYRP4	chr1:153302596-153321022	0	0.0226676	0	0	0	0	0.0545388	0	0	0	0	0	0	0	0	0
THEM4	chr1:151843342-151882361	0.144933	0.391408	0.496409	0.492699	0.343986	0.322334	0.40253	0.392345	0.198897	0.290636	0.254747	0.297995	0.163038	0.330571	0.186248	0.31335
S100A12	chr1:153346183-153348075	0	0	0	0	0	0	0	0	0	0.128007	0	0	0.904212	0	0	0
S100A9	chr1:153330329-153333503	77.2767	48.9088	29.3522	23.2673	38.3592	31.3596	29.2978	53.2414	38.3391	34.419	16.7468	17.8441	67.5679	44.9484	16.0309	8.82371
S100A7A	chr1:153388999-153395701	0	0	0	0	0	0	0	0	0	0	0	0	0	0	0	0
S100A7L2	chr1:153409470-153412503	0	0	0	0	0	0	0	0	0	0	0	0	0	0	0	0
S100A7	chr1:153430219-153433137	0	0.214777	0	0	0	0	0	0	0.222962	0.124986	0.229243	0	0	0	0.13347	0
S100A8	chr1:153362507-153363664	7.61703	5.26808	1.12236	1.54289	0.523768	0.8708	2.46556	2.83448	3.32254	4.10564	1.68644	1.43212	12.4137	7.02446	0.750813	0.293826
S100A5	chr1:153509622-153514241	0	0	0	0	0	0	0	0	0	0	0	0	0	0	0	0
S100A6	chr1:153507075-153508717	3.47146	5.66311	1.99774	6.13604	2.44059	4.91638	4.509	6.33441	3.73544	45.1318	2.92074	2.85006	63.619	45.8903	3.23548	1.09984
S100A4	chr1:153516094-153518282	0.570119	0.431922	0	1.57388	0	0	0.0929439	0.378135	0	10.0646	0.0908867	0.0938948	8.48568	4.46509	0.400579	0.476227
S100A3	chr1:153519808-153521734	0	0	0	0	0	0	0	0	0	0.0815526	0	0	0	0	0	0
S100A2	chr1:153533584-153538306	0	0.0425433	0.0423802	0	0	0	0	0	0	0.0534732	0	0	0.0600056	0.0501886	0	0.0478993
S100A16	chr1:153579366-153585514	12.4958	17.7269	7.68052	5.05151	14.3158	15.7656	7.23098	9.90701	8.40332	1.51034	10.0473	10.452	0.980763	0.350515	16.5671	8.33012
S100A14	chr1:153586731-153588790	16.3585	13.5395	8.75231	5.17939	10.2197	14.394	5.4603	12.6002	9.12431	1.10201	13.2365	14.8398	0.654594	0.166399	9.88296	10.2433
SNAPIN	chr1:153631144-153634326	1.89435	2.52018	1.36397	2.09069	1.37016	1.62831	2.17246	1.72836	1.73599	1.85123	1.62086	1.69245	1.93477	1.99679	1.28485	1.2674
ILF2	chr1:153634513-153643479	6.27034	15.4602	5.14389	10.7406	6.91847	7.78396	8.44648	6.29436	4.80917	4.06516	6.64429	7.47816	4.90926	3.27536	10.7837	6.28512
NPR1	chr1:153651163-153666468	0	0.00921613	0.00990906	0.0299587	0	0	0.0120326	0	0	0	0	0	0	0	0	0.0116628
TCHH	chr1:152078792-152086556	0.016705	0.0424586	0.00956896	0.0146847	0.00634239	0.0169147	0.145671	0.0373176	0.0725871	0.0999566	0.0115104	0.00598474	0.0544439	0.0425747	0.0168648	0.0454643
S100A13	chr1:153591275-153606568	12.2925	12.4865	5.64669	12.6593	9.70594	9.2654	7.97332	7.87626	4.91342	2.23873	8.86988	7.6817	2.72359	1.42778	9.01562	5.19663
S100A1	chr1:153600872-153604513	69.6559	76.4508	49.655	76.7359	53.2011	65.3712	61.9412	50.5176	42.0278	11.1551	57.2866	63.9039	11.1411	2.52446	51.7521	51.8184
CHTOP	chr1:153606457-153618782	1.41141	3.30734	1.48118	3.34701	1.54894	1.54584	2.39276	1.82829	1.26845	2.2522	1.41163	1.42061	2.79593	2.63868	2.63417	1.3129
SLC27A3	chr1:153747767-153752633	0.0615137	0.0854127	0	0.0278625	0.0250863	0.0931123	0.0456511	0.081849	0.0584898	1.45567	0.112494	0.0633091	1.69075	1.32551	0	0.086984
INTS3	chr1:153700566-153746555	1.02483	1.84604	0.737326	1.88282	0.729273	0.976856	1.69079	1.02806	0.823778	1.52969	0.955593	1.11368	1.2966	1.09273	2.13754	0.519177
CRTC2	chr1:153920147-153931132	1.03067	1.13831	0.701124	1.42565	0.876648	1.02207	1.08789	0.841193	0.782289	1.8714	1.10701	0.767312	2.62614	2.39865	0.968674	0.951945
SLC39A1	chr1:153931587-153940188	1.90207	1.33903	1.37086	1.15593	2.39313	2.03059	1.038	2.06251	2.01176	5.05497	2.13461	1.71429	5.62796	4.99309	0.759898	1.83763
POGZ	chr1:151375199-151431941	0.354722	0.473084	0.261584	0.623972	0.313416	0.460842	0.463965	0.359008	0.365379	0.852267	0.291732	0.24223	0.78896	0.799919	0.498183	0.299232
CREB3L4	chr1:153940396-153946832	0.326896	0.275929	0.220052	0.507083	0.359821	0.126014	0.438461	0.289077	0.256239	0.235012	0.212087	0.393934	0.318052	0.316705	0.460403	0.0701284
JTB	chr1:153946744-153950451	12.4871	15.6706	11.149	13.0229	11.5278	13.6143	14.031	9.55867	10.016	6.9526	11.6557	12.9992	8.46389	4.79478	12.9217	11.9974
RAB13	chr1:153954127-153958806	0.610594	0.811705	0.724652	0.813123	1.07269	1.0012	0.41337	0.81095	0.875648	3.64014	1.00787	1.12935	5.68403	5.93394	0.371692	0.916644
NUP210L	chr1:153965167-154127592	0	0	0	0	0	0	0	0	0	0.00856781	0	0	0	0	0	0
RPS27	chr1:153963238-153964631	96.5366	228.284	70.7767	256.374	80.0425	60.3727	160.566	70.3419	55.8382	101.131	70.5676	61.7988	162.531	84.3515	192.091	60.8954
MIR190B	chr1:154166140-154166219	0	0	0	0	0	0	0	0	0	0	0	0	0	0	0	0
C1orf189	chr1:154171847-154178809	0	0	0	0	0	0.199359	0	0	0	0	0.156266	0	0	0	0	0
DENND4B	chr1:153901976-153919154	0.555917	0.656233	0.385414	0.520915	0.448143	0.493796	0.639399	0.381272	0.396517	2.61763	0.49525	0.451657	2.89847	3.27956	0.603866	0.427348
HAX1	chr1:154245038-154248355	3.80252	6.53468	3.6172	6.57151	4.37751	3.89137	3.89348	4.29331	3.64296	3.50702	4.48527	4.11763	4.01187	2.83888	6.05042	3.89949
AQP10	chr1:154293591-154297801	0	0	0	0	0	0	0	0	0	0	0	0	0	0	0	0
ATP8B2	chr1:154298035-154323780	0	0.0413765	0	0.0317273	0.0181194	0.0224657	0.0453563	0.00786539	0.0488056	0.0554605	0	0.125498	0.0101224	0.0463553	0.0264916	0
GATAD2B	chr1:153777202-153895451	0.186784	0.337815	0.140442	0.320452	0.138698	0.192393	0.297648	0.270674	0.169411	0.601865	0.18285	0.206532	0.457089	0.494153	0.330232	0.25005
SHE	chr1:154451953-154474526	0	0	0.0134993	0	0	0	0	0.00741782	0	0.0251633	0	0	0.0194387	0	0	0
TDRD10	chr1:154474694-154520623	0	0	0.0178949	0	0	0	0	0	0.0199252	0.0978698	0	0.0205162	0	0	0	0
UBE2Q1	chr1:154521050-154531120	0.915116	2.03177	0.992059	1.72751	1.22025	1.32644	1.92002	1.51084	1.04135	1.87762	1.30574	1.43799	1.99078	1.6081	1.66164	0.785119
CHRNB2	chr1:154540256-154552353	0	0	0	0	0.00891047	0	0	0	0	0.00912389	0	0	0	0	0.00859539	0
C1orf43	chr1:154179182-154193273	7.29608	11.9595	6.33946	8.84525	8.20994	8.95408	10.3937	6.34958	4.92114	8.83283	8.20715	7.51859	8.7163	6.53686	8.72155	7.36653
UBAP2L	chr1:154192654-154243329	1.66666	3.4619	1.55006	3.95936	2.40837	2.4394	3.40066	1.79394	1.77855	3.32863	1.92444	2.21232	3.61867	2.96594	4.95503	1.51875
KCNN3	chr1:154669941-154842754	0	0	0.00347541	0	0	0	0	0	0	0.00416626	0	0	0	0.00372312	0	0
PMVK	chr1:154897207-154909484	3.10254	3.68487	2.37805	2.93231	1.84562	2.83265	2.50022	1.94544	1.48153	2.24383	2.62784	2.33479	2.04388	1.06972	3.37397	1.50895
PBXIP1	chr1:154916558-154928567	2.51975	0.559709	1.53328	0.761646	1.52178	2.32006	0.608728	2.08783	1.94343	1.49737	2.81318	2.44595	0.82432	0.763184	0.789605	2.34929
PYGO2	chr1:154929501-154934258	0.641024	1.05948	1.02931	0.924732	1.04012	1.22178	0.92034	0.825285	1.13424	0.968844	1.28549	1.27119	0.694966	0.78414	0.761492	1.50575
IL6R	chr1:154377668-154441926	0.169667	0.300501	0.125858	0.295733	0.0468989	0.0888658	0.372292	0.177302	0.343574	2.67714	0.168561	0.153484	2.54617	2.34272	0.485594	0.129921
CKS1B	chr1:154947117-154951725	1.60873	3.91795	2.42335	3.74577	2.96786	2.26313	2.77107	2.75444	1.69083	1.09022	2.24464	1.97543	1.2197	0.674215	3.39552	2.28409
MIR4258	chr1:154948168-154948259	0	0	0	0	0	0	0	0	0	0	0	0	0	0	0	0
FLAD1	chr1:154955769-154965587	0.986497	1.63895	0.868095	1.8066	0.96435	1.03335	0.895528	1.35382	0.86513	1.32971	0.840033	1.05036	1.47823	1.1384	1.14818	0.801618
LENEP	chr1:154966061-154966791	0	0	0	0	0	0	0	0.0675569	0	0	0	0	0.0900524	0	0	0
ZBTB7B	chr1:154975111-154990999	7.20378	5.8298	5.31195	5.08729	4.16467	8.90328	6.57426	5.73691	4.23142	3.14079	6.26029	6.2862	2.50312	2.15831	8.92104	6.30619
DCST2	chr1:154991002-155006257	0	0	0.0181817	0.027117	0	0	0	0	0	0.0484523	0	0.020525	0	0	0	0.0212962
SHC1	chr1:154934773-154946959	2.76063	4.46512	2.26256	3.25574	2.5011	2.78847	3.80193	2.72517	2.21281	3.44506	2.74139	2.67479	2.67235	2.52968	5.19964	2.37002
DCST1	chr1:155006281-155023406	0.118052	0.0168016	0.0703645	0.0265881	0	0	0	0	0.0760412	0.0237335	0	0.0204092	0.100557	0.0221744	0	0.0207797
EFNA4	chr1:155036212-155042029	0.358219	0.155282	0.249286	0.360291	0.30881	0.392497	0.22105	0.502761	0.166818	0.248373	0.432509	0.36669	0	0.0369834	0.20283	0.317836
EFNA3	chr1:155051347-155060014	0.329966	0.0713636	0.100978	0.149117	0	0.248292	0.12273	0.195173	0.185701	0.171014	0.212626	0.142458	0.141963	0.191447	0.183113	0.264998
TPM3	chr1:154127779-154164609	3.08935	5.80139	3.03134	4.21303	4.92993	4.22755	3.74014	3.70082	2.98717	9.85455	4.18956	3.66615	11.1433	9.30219	4.50358	3.11471
EFNA1	chr1:155100348-155107386	1.84463	0.310265	0.658279	0.79016	0.373188	1.24502	0.459211	1.16216	1.07813	0.121904	0.8829	1.12874	0.200356	0	0.381286	1.40814
DPM3	chr1:155112366-155112996	7.29813	4.64876	5.67334	6.74914	3.88604	4.27993	3.96779	6.32908	6.15183	1.98394	5.44905	5.07825	3.39772	1.67022	2.87154	5.22016
KRTCAP2	chr1:155141883-155145804	11.4831	8.53849	8.39929	11.0659	12.7663	9.4487	9.06346	10.1325	11.2656	8.90859	10.6486	10.0663	6.29864	6.74084	9.36149	9.82061
SLC50A1	chr1:155108287-155111334	30.5999	27.9678	26.5488	32.1746	32.3462	23.8347	28.7917	31.6914	31.3198	7.80155	31.4481	34.052	6.70519	3.79419	27.902	30.7599
TRIM46	chr1:155146359-155157445	1.39767	2.02639	0.644789	1.46162	0.995601	1.112	0.810961	0.977026	0.774985	0.318545	1.15672	0.846288	0.36442	0.0696969	2.27468	0.955694
MIR92B	chr1:155164967-155165063	0	0	0	0	0	0	0	0	0	0	0	0	0	0	0	0
THBS3	chr1:155165378-155177690	0.702023	0.824763	0.509639	0.869725	0.642419	0.57549	0.753117	0.63221	0.793572	1.30706	0.415198	0.528426	1.15319	1.25195	0.542855	0.416218
MTX1	chr1:155178489-155183624	2.33825	2.89063	1.84461	3.62808	2.66683	2.05722	3.18269	2.14219	1.71977	1.8284	2.07276	1.53411	2.09377	1.61361	2.28043	1.98918
GBAP1	chr1:155183615-155197325	0.0646405	0.0763078	0	0.0290171	0	0.0626831	0	0.0433491	0.0418101	0.102848	0.0231672	0.0443682	0.168708	0.170198	0.122015	0.0455834
ADAM15	chr1:155023761-155035252	6.58728	4.37886	4.54085	3.86804	5.11962	5.85017	2.95632	4.21716	4.22194	2.86557	5.25726	5.77798	2.3168	1.62202	7.09787	5.81247
FAM189B	chr1:155216995-155225274	1.06762	0.771696	0.649354	1.44519	1.39446	1.58102	1.46069	1.12863	1.17906	0.881209	0.887228	0.816193	0.709927	0.771792	1.07871	0.663941
SCAMP3	chr1:155225769-155232176	4.62528	3.96623	3.68805	3.2544	3.23388	3.92537	2.6592	3.88518	3.02588	5.04034	4.38677	5.0076	5.54127	4.19293	2.77612	4.1757
CLK2	chr1:155232658-155243281	0.200608	0.38392	0.155192	0.392997	0.196034	0.380299	0.165887	0.264867	0.209208	1.04557	0.205332	0.284001	1.15191	1.07608	0.30214	0.222532
HCN3	chr1:155247373-155259638	0.103962	0.0237849	0.0502894	0.0764314	0.0329987	0.0607889	0.075706	0.100778	0.0408603	0.0505273	0.0755454	0.140676	0.0533353	0.0474372	0.0618887	0.105658
PKLR	chr1:155259083-155271225	0	0	0	3.7519e-08	0	0	0	6.05866e-09	0	0	0	0	0	0	0	3.20122e-10
GBA	chr1:155204238-155214653	2.31506	1.88765	1.63386	2.13249	1.99981	2.36634	1.47722	3.29145	3.1667	4.69576	1.75876	2.28964	6.6312	4.18506	3.33304	2.28922
ADAR	chr1:154554533-154600456	4.03955	6.90565	4.03625	6.68534	5.50962	5.48534	7.87129	5.59048	5.48864	10.8123	4.65834	5.14931	8.71758	7.47897	8.74669	4.39549
MSTO1	chr1:155580006-155584758	1.22576	3.22411	0.485909	2.35563	1.41802	1.04002	2.76111	1.30496	1.16482	1.2776	0.719297	0.96465	1.66174	1.26906	3.0368	0.486577
FDPS	chr1:155278538-155290457	21.7478	14.9708	14.3664	17.4807	18.7843	22.2947	17.8828	18.6636	16.9988	3.79842	22.6441	23.0053	4.72672	2.47166	11.5238	15.7144
RUSC1	chr1:155290639-155300909	1.11581	0.852815	0.909185	0.578335	0.728085	0.668965	0.791615	0.934425	0.884711	1.50873	0.990182	0.970501	1.17404	0.999747	1.06802	0.813833
RUSC1-AS1	chr1:155290250-155293938	1.42448e-130	0.0481423	7.73606e-115	5.64545e-63	0	1.35892e-176	0.0552839	1.17871e-108	1.72814e-307	0.0759442	4.99577e-188	1.97124e-121	0.0742975	0.0632758	1.05747e-60	2.41069e-80
DAP3	chr1:155658881-155708800	2.09206	3.67423	1.87385	4.10222	2.77878	2.07452	2.27319	2.01716	1.80317	2.19879	1.9125	2.18458	3.5867	2.4376	2.59555	2.28379
MUC1	chr1:155158299-155162706	114.967	18.9292	94.5123	38.9762	82.1771	57.9906	58.1982	100.35	110.811	6.2117	84.5988	92.3617	3.33087	0.840863	41.322	92.122
SYT11	chr1:155829259-155854990	0	0.0220947	0	0.0211762	0	0	0.0172839	0	0	0.723672	0	0	0.528931	0.403589	0	0
RIT1	chr1:155867600-155881177	0.377799	0.488573	0.25003	0.532739	0.325292	0.468308	0.370559	0.534187	0.397517	1.5261	0.39131	0.478285	2.14761	1.59069	0.418148	0.443329
KIAA0907	chr1:155882835-155904188	0.449264	0.409246	0.140833	0.333205	0.341629	0.207255	0.496463	0.224298	0.334855	0.520473	0.205684	0.286505	0.29291	0.544043	0.6122	0.261387
SNORA42	chr1:155889699-155889833	0	0	0	0	0	0	0	0	0	0	0	0	0	0	0	0
SCARNA4	chr1:155895748-155895877	0	0	0	0	0	0	0	0	0	0	0	0	0	0	0	0
RXFP4	chr1:155911479-155912625	0	0	0	0	0	0	0	0	0	0	0	0	0	0.0584485	0	0
ARHGEF2	chr1:155916629-155948336	0.931242	1.54279	0.607277	1.52895	0.463845	0.844926	1.54939	0.790493	0.528477	4.29617	0.832858	0.983325	5.14359	3.97555	2.01124	0.591363
SSR2	chr1:155978838-155990758	13.1421	24.328	10.4373	23.5765	14.71	13.8029	21.2993	12.0348	10.4926	13.1462	12.5906	13.6091	15.1506	10.0295	18.7785	11.3134
UBQLN4	chr1:156005091-156023516	1.25373	2.20484	1.22259	1.607	1.40999	1.68854	1.41269	1.60828	1.32807	1.6197	1.68904	1.63036	1.86129	1.31763	2.15625	1.16899
LAMTOR2	chr1:156024516-156028301	5.33818	6.21803	2.52051	6.68745	3.50869	5.56538	5.31779	3.20903	2.34275	3.24104	3.72957	4.06679	3.32518	2.14806	3.19122	3.91109
RAB25	chr1:156030965-156040295	8.4085	10.8307	6.1569	12.6783	7.14838	9.04901	6.42063	8.54132	6.89792	1.96562	8.91188	7.8921	1.95736	0.406859	6.33598	7.10558
MEX3A	chr1:156041803-156051789	0	0.0534189	0	0.0312732	0	0	0.0170211	0	0	0.00903443	0.00826001	0	0.0198584	0.016903	0.0701399	0
MSTO2P	chr1:155715608-155721369	0.110121	0.121999	4.13162e-160	0.136446	0.0372487	0.0589693	0.229321	0.0523539	0.0371216	0.139294	0.0817051	0.0356294	0.162258	0.181995	0.0960617	0.0194032
GON4L	chr1:155719509-155826972	0.13416	0.211354	0.120505	0.420556	0.0998917	0.190647	0.194079	0.212296	0.158144	0.497752	0.146893	0.176212	0.629592	0.585187	0.45274	0.15886
ASH1L	chr1:155305051-155532324	0.21892	0.431117	0.222449	0.643828	0.302606	0.309755	0.500912	0.298941	0.219746	0.494111	0.220882	0.246899	0.451943	0.355179	0.643998	0.266101
MIR555	chr1:155316140-155316236	0	0	0	0	0	0	0	0	0	0	0	0	0	0	0	0
LOC645676	chr1:155531771-155533735	6.49662e-07	0.164217	0.0279043	0	0.0385531	0.12728	0.0784909	0.0624297	0.00312525	0.0785331	0	0.0406694	0.0779315	0.148407	0.106199	0.0987621
POU5F1P4	chr1:155402970-155404053	0	0	0	0	0	0	0	0	0	0	0	0	0	0	0	0
SLC25A44	chr1:156163729-156182587	0.473871	0.716021	0.745785	0.732835	0.70166	1.07288	0.968119	0.609991	0.604214	1.03078	0.872292	0.926497	1.33569	1.05359	1.12029	0.696778
LMNA	chr1:156084460-156109878	10.8423	11.0934	6.85841	8.15959	9.8626	12.6486	6.89541	10.7014	8.93015	15.8865	9.2389	8.5982	12.6651	10.0233	9.94462	7.77375
YY1AP1	chr1:155629232-155658823	1.18474	1.73251	1.15497	1.93464	0.817034	0.979981	1.03477	0.968638	0.847258	1.99145	0.973949	1.00781	1.91962	1.84006	1.92333	0.954013
PAQR6	chr1:156213206-156217843	0.157449	0.0907934	0	0	0	0.0391447	0	0	0	0.172325	0.153325	0.0277319	0.179119	0.480246	0	0
PMF1	chr1:156182778-156209868	1.88241	1.74847	1.1107	1.68508	1.26719	1.27652	0.729859	1.48725	1.20053	1.28991	1.3488	1.1474	1.14407	1.22214	1.77499	1.17766
PMF1-BGLAP	chr1:156182778-156213123	0.268372	0.396391	0.232821	0.729275	0.310021	4.54301e-13	0.337346	8.22579e-79	6.10952e-06	1.57468e-32	0.212495	0.391764	0.267451	1.2059e-12	1.95889e-06	0.120947
BGLAP	chr1:156211950-156213123	2.96874e-139	1.74479e-26	7.13892e-30	4.228e-65	1.13938e-17	0.258943	1.08548e-216	0.167744	0.265911	0	0.107569	5.31655e-24	7.84021e-27	0.100864	0.48689	0
C1orf85	chr1:156262483-156265449	1.74353	1.53211	1.12936	2.61733	1.65033	1.06818	1.37818	1.49654	1.49454	5.96228	1.30828	0.979453	7.01962	6.14757	0.606113	0.932918
VHLL	chr1:156268414-156269428	0	0	0	0	0	0	0	0	0	0	0	0	0	0	0	0
TMEM79	chr1:156252703-156262234	0.642717	0.362605	0.204781	0.341267	0.272236	0.338969	0.271559	0.159986	0.136643	0.499568	0.297433	0.322202	0.435396	0.360776	0.348796	0.2179
RHBG	chr1:156339002-156355011	0	0	0	0	0	0	0	0	0	0	0	0	0	0	0	0
C1orf61	chr1:156374054-156399184	0	0	0	0	0	0	0	0	0	0	0	0	0	0	0	0
MIR9-1	chr1:156390132-156390221	0	0	0	0	0	0	0	0	0	0	0	0	0	0	0	0
SMG5	chr1:156219014-156252620	2.42988	3.0745	2.41983	2.87242	2.82133	3.0918	2.95246	2.90478	2.60933	2.60423	2.75301	2.69503	2.97872	2.27683	3.36564	2.20574
SEMA4A	chr1:156119734-156147542	1.34677	1.11815	0.866502	1.39845	1.33296	0.869566	1.09921	1.03504	0.905801	4.22716	1.0095	0.889406	4.31824	4.24619	1.34087	0.93683
TTC24	chr1:156549518-156556562	0	0	0	0	0	0	0	0	0	0	0	0	0.0252365	0	0	0
APOA1BP	chr1:156561557-156564091	4.66442	4.37006	3.61146	6.38283	4.58894	5.69793	3.39847	4.27316	3.36564	2.68709	3.97638	4.82495	3.17439	2.25991	4.98856	3.30671
GPATCH4	chr1:156564099-156571279	0.395211	0.451925	0.280364	0.277667	0.381474	0.664046	0.329901	0.527183	0.383061	0.331517	0.203758	0.34798	0.8015	0.316868	0.405422	0.291084
HAPLN2	chr1:156589085-156595517	0	0	0	0	0	0	0	0	0	0	0	0	0	0	0	0
CCT3	chr1:156278751-156308206	4.90248	12.1486	3.88337	11.9584	6.70327	6.35319	7.14422	5.66006	4.29203	4.96743	5.22249	5.72034	5.53182	2.78959	8.5409	4.90116
C1orf182	chr1:156307104-156316785	0.0755459	0.0478756	0.0946773	0.13689	0.114272	0.0677766	0.167467	0	0.101858	0	0.107565	0	0	0	0.177229	0
MEF2D	chr1:156433518-156470529	0.414315	0.490767	0.288655	0.480682	0.2565	0.469715	0.491514	0.420083	0.333347	1.78641	0.442205	0.361779	1.29268	1.26515	0.467995	0.496702
CRABP2	chr1:156669399-156675608	9.07923	8.34046	7.37067	7.71144	9.32624	13.1164	3.00567	6.48609	4.46707	1.13949	12.3018	10.7012	2.56526	0.386311	2.95283	8.54099
IQGAP3	chr1:156495196-156542396	0.00977445	0.0281221	0	0.0968426	0	0	0.0139068	0	0	0.11681	0.0137527	0.00667886	0.0670466	0.0727911	0.0719786	0
ISG20L2	chr1:156692412-156697705	0.592929	1.71982	0.665616	0.977747	0.802867	1.12499	1.04439	0.823874	0.754292	1.15739	1.10295	0.921885	1.10482	1.11077	1.1777	0.944943
BCAN	chr1:156611739-156629320	0.0239976	0.0523133	0.0142906	0	0.0765995	0.0236196	0.108629	0	0	0	0	0.0741368	0	0	0.0938371	0
MRPL24	chr1:156707093-156710923	4.20417	5.80855	3.91512	7.37447	5.54738	5.05341	4.58796	6.08513	4.07896	2.57144	4.77408	4.80444	3.76318	2.7861	4.25886	2.44853
PRCC	chr1:156737273-156770609	1.5016	2.91523	1.59401	3.2434	1.82799	1.83353	1.97322	1.8778	1.81025	2.53211	2.01522	1.70014	2.18539	1.64469	3.03115	1.27877
SH2D2A	chr1:156776034-156786640	0	0	0	0	0	0	0	0	0	0	0	0	0.138866	0	0	0
NTRK1	chr1:156785541-156851642	0	0	0	0	0	0	0	0	0	0	0	0	0	0	0	0
INSRR	chr1:156810664-156828712	0	0	0	0	0	0	0	0	0	0	0	0	0	0	0	0
RRNAD1	chr1:156698262-156706752	1.06912	0.754851	0.61218	0.786372	0.875771	1.2389	0.686797	0.910542	0.521655	0.940459	0.644362	1.04377	0.774091	0.919767	0.747799	0.885558
PEAR1	chr1:156863522-156886226	0	0	0	0	0	0	0	0	0	0	0	0	0	0.0111347	0	0
LRRC71	chr1:156890423-156902880	0	0	0	0	0	0	0	0	0	0	0	0	0	0	0	0
ETV3L	chr1:157061834-157069600	0	0.0189385	0.0197526	0	0.0257752	0	0.0241739	0	0	0.0259321	0.0699962	0.0929516	0.0852077	0.0478001	0.0756308	0
NES	chr1:156638555-156647189	0.87012	1.03024	0.41583	0.453857	0.239872	0.685168	0.297626	0.211375	0.124684	0.224453	1.02632	0.927779	0.201133	0.0206136	2.04251	0.43002
FCRL5	chr1:157483166-157522310	0	0	0	0	0	0	0	0	0	0	0	0	0	0	0	0
FCRL4	chr1:157543538-157567870	0	0	0	0	0	0	0	0	0	0	0	0	0	0	0	0
FCRL3	chr1:157647977-157670647	0	0	0	0	0	0	0	0	0	0.0431255	0	0	0	0	0	0
FCRL2	chr1:157715522-157746922	0	0	0	0	0	0	0	0	0	0	0	0	0	0	0	0
FCRL1	chr1:157764193-157789940	0	0	0	0	0	0	0	0	0	0	0	0	0	0	0	0
CD5L	chr1:157800703-157811634	0	0	0	0	0	0	0	0	0	0	0	0	0.0501377	0	0	0
KIRREL	chr1:157963062-158065844	0	0	0.0111442	0.0167	0	0	0	0.0123158	0.0118866	0.0451528	0.0401078	0.0125405	0	0	0	0
LOC646268	chr1:158101833-158110430	0	0	0	0	0	0	0	0	0	0	0	0	0	0	0	0
CD1D	chr1:158149736-158156216	0	0.0104143	0	0	0	0	0.0125437	0	0	0.314273	0	0	0.119012	0.320937	0	0
CD1A	chr1:158223926-158228058	0	0	0	0	0	0	0	0	0	0.0240159	0	0	0	0.0689618	0	0
CD1C	chr1:158259562-158264564	0	0	0	0	0	0	0	0	0	0	0	0	0	0	0	0
CD1B	chr1:158297739-158301321	0	0	0	0	0	0	0	0	0	0.0365143	0	0	0	0	0	0
CD1E	chr1:158323485-158327343	0	0	0	0	0	0	0	0	0	0.037112	0	0	0.0441176	0	0	0
OR10T2	chr1:158368311-158369256	0	0	0	0	0	0	0	0	0	0	0	0	0	0	0	0
OR10K2	chr1:158389717-158390656	0	0	0	0	0	0	0	0	0	0	0	0	0	0	0	0
OR10K1	chr1:158435351-158436293	0	0	0	0	0	0	0	0	0	0	0	0	0	0	0	0
OR10R2	chr1:158449667-158450675	0	0	0	0	0	0	0	0	0	0	0	0	0	0	0	0
OR6Y1	chr1:158516917-158517895	0	0	0	0	0	0	0	0	0	0	0	0	0	0	0	0
OR6P1	chr1:158532440-158533394	0	0	0	0	0	0	0	0	0	0	0	0	0	0	0	0
OR10X1	chr1:158548708-158549689	0	0	0	0	0	0	0	0	0	0	0	0	0	0	0	0
OR10Z1	chr1:158576228-158577170	0	0	0	0	0	0	0	0	0	0	0	0	0	0	0	0
SPTA1	chr1:158580495-158656506	0	0	0	0	0	0	0.00457961	0	0	0.0097843	0	0	0	0.00462283	0	0
OR6K2	chr1:158669467-158670442	0	0	0	0	0	0	0	0	0	0	0	0	0	0	0	0
OR6K3	chr1:158686957-158687905	0	0	0	0	0	0	0	0	0	0	0	0	0	0	0	0
OR6K6	chr1:158724605-158725637	0	0	0	0	0	0	0	0	0	0	0	0	0	0	0	0
OR6N1	chr1:158735533-158736472	0	0	0	0	0	0	0	0	0	0	0	0	0	0	0	0
OR6N2	chr1:158746471-158747425	0	0	0	0	0	0	0	0	0	0	0	0	0	0	0	0
MNDA	chr1:158801167-158819270	0	0.129445	0	0.195449	0.0230494	0	0.0235636	0	0	3.59017	0	0	1.96742	2.25613	0	0
PYHIN1	chr1:158901341-158946843	0	0	0	0	0	0	0	0	0	0	0	0	0	0	0	0
ETV3	chr1:157094458-157108383	0.220205	0.294635	0.0995338	0.390639	0.168281	0.212278	0.232707	0.10289	0.106441	0.888248	0.180575	0.214344	0.784878	0.980634	0.474474	0.0649061
CYCSP52	chr1:157098153-157098463	0	0	0	0	0	0	0	0	0	0	0	0	0	0	0	0
HDGF	chr1:156711898-156722240	7.11724	11.3534	5.89973	13.6309	7.46147	7.70562	9.79482	6.10954	6.05561	7.35647	7.22721	8.09144	9.86754	7.35944	11.1903	5.3415
AIM2	chr1:159032274-159046647	0	0.0260152	0	0	0	0	0	0	0	0.224903	0	0	0.485662	0.164307	0	0
CADM3	chr1:159141376-159172932	0	0	0	0	0	0	0	0	0	0	0	0	0	0	0	0
LOC100131825	chr1:159165774-159172212	0	0	0	0	0	0	0	0	0	0	0	0	0	0	0	0
DARC	chr1:159173802-159176290	0	0	0	0	0	0	0	0	0	0	0	0	0	0	0	0
FCER1A	chr1:159259503-159278014	0	0	0	0	0	0	0	0.0342025	0	0	0	0	0.0916952	0	0	0
OR10J3	chr1:159283459-159284449	0	0	0	0	0	0	0	0	0	0	0	0	0	0	0	0
OR10J1	chr1:159409511-159410600	0	0	0	0	0	0	0	0	0	0	0	0	0	0	0	0
OR10J5	chr1:159504867-159505797	0	0	0	0	0	0	0	0	0	0	0	0	0	0	0	0
APCS	chr1:159557615-159558661	0	0	0	0	0	0	0	0	0	0	0	0	0	0	0	0
CRP	chr1:159682078-159684379	0	0	0	0	0	0	0.0233837	0	0	0	0	0	0	0	0	0
FCRL6	chr1:159772172-159786047	0	0	0	0	0	0	0	0	0	0	0	0	0.0503031	0.171549	0.0221326	0
DUSP23	chr1:159750758-159752333	9.25801	9.38541	5.52681	5.95826	9.31922	10.1337	8.13613	16.3931	10.0552	3.87215	8.2304	9.18048	4.27307	3.5789	5.61093	5.29573
CCDC19	chr1:159842153-159869906	0.0265206	0	0	0.0233531	0	0.0257745	0	0	0	0.0207504	0	0	0.0227274	0.0192934	0	0
TAGLN2	chr1:159887902-159895284	13.6059	9.74287	6.67822	4.54145	5.90821	14.1386	2.56964	11.1029	8.15716	31.407	10.0636	10.4126	38.091	29.1663	3.50876	11.4896
SLAMF8	chr1:159796478-159807282	7.66906e-09	0.282505	2.45079e-09	0.232688	0	0	0.0416582	0	0	3.54235	0.0131438	0.0125362	6.04888	6.30041	0.014291	0
C1orf204	chr1:159804263-159825137	0.0251347	5.03364e-09	0.0159634	1.79718e-08	0	0	0.0971556	0.0173637	0	0.0317465	0	0	0.0978929	0.143415	0.0199128	0
VSIG8	chr1:159824105-159832447	0	0	0	0	0	0	0	0	0	0	0	0	0	0.0321872	0	0
SLAMF9	chr1:159921281-159924044	0	0	0	0.307299	0	0	0.0638165	0	0	0.420175	0	0	0.603651	0.447472	0	0
LOC100505633	chr1:159931013-159948876	0	0	0	0	0	0.0361905	0	0	0	0	0	0	0	0	0	0
IFI16	chr1:158979681-159024945	4.10645	6.70982	3.97796	9.10223	6.78423	5.63044	8.49547	9.45411	8.27703	5.92781	4.47037	4.74481	5.11493	3.7285	6.77994	6.67364
KCNJ10	chr1:160007256-160040051	0	0	0	0	0	0	0	0	0	0.185876	0	0	0.247544	0.185104	0	0
KCNJ9	chr1:160051359-160059212	0	0	0	0	0	0	0	0	0	0	0	0	0	0	0	0
PIGM	chr1:159997461-160001783	0.400926	0.399182	0.284987	0.380319	0.352628	0.434194	0.266215	0.314189	0.397241	0.439947	0.377779	0.511983	0.354063	0.437257	0.227672	0.32129
IGSF8	chr1:160061129-160068618	2.24078	0.852539	1.30126	0.509899	1.72968	2.05785	0.845031	2.04004	1.74062	1.69752	2.08568	2.68395	1.08378	0.791773	0.671412	1.8658
ATP1A2	chr1:160085519-160113374	0	0	0	0	0	0	0	0	0	0	0	0	0	0	0	0
ATP1A4	chr1:160121351-160156767	0	0	0	0	0	0	0	0	0	0	0	0	0.0638409	0	0	0
CASQ1	chr1:160160284-160171676	0	0.0349045	0	0	0	0	0	0	0	0	0	0	0	0.0214617	0	0
PEA15	chr1:160175124-160185162	4.83432	2.77802	5.07573	3.4925	10.6984	6.37704	3.53437	9.40651	8.16028	8.23887	5.13211	5.12667	9.52083	8.32583	1.228	6.04171
IGSF9	chr1:159896828-159915386	0.401318	0.194189	0.156985	0.241639	0.212421	0.377246	0.0907144	0.245682	0.158506	0.0145427	0.23068	0.308843	0.0663895	0	0.206602	0.197378
ARHGEF11	chr1:156904631-157015162	0.155195	0.427306	0.155876	0.492208	0.246241	0.24753	0.401282	0.150079	0.241489	2.68209	0.239736	0.291069	2.72054	2.81829	0.385144	0.22379
MIR765	chr1:156905922-156906036	0	0	0	0	0	0	0	0	0	0	0	0	0	0	0	0
NHLH1	chr1:160336860-160342638	0	0	0	0	0	0	0	0	0	0.0239181	0	0	0	0	0	0
VANGL2	chr1:160370363-160398468	0.316058	0.134654	0.165323	0.303194	0.169568	0.221113	0.158102	0.0977902	0.190342	0.0803804	0.28185	0.267115	0.0124202	0	0.140557	0.142256
SLAMF6	chr1:160454819-160493052	0	0.0147349	0	0.0977372	0	0	0	0	0	0.212614	0	0	0.144227	0.159184	0	0
COPA	chr1:160258376-160313354	4.36615	10.9822	3.77093	11.0862	6.59028	6.22012	11.0649	5.85616	5.92983	6.58595	5.19177	5.35328	5.36864	4.08119	13.4994	5.15376
NCSTN	chr1:160313062-160328742	2.62597	2.34936	1.99119	2.21976	1.49866	1.6004	2.09706	2.05553	2.08034	5.66726	2.37568	2.34136	4.86305	5.0002	2.07931	1.61709
SUMO1P3	chr1:160287054-160288260	0.161719	0.115894	0.10575	0.0485882	0.165443	0.0944865	0.042829	0	0	0.126379	0	0	0	0.0805076	0.233429	0.0790636
SLAMF1	chr1:160579890-160617081	0.163797	0.087711	0.1374	0.200379	0.146452	0.076894	0.163218	0.263342	0.368064	0.0855109	0.13818	0.0783697	0.0494785	0.0610593	0.132197	0.196637
CD48	chr1:160648535-160681585	0	0.180436	0	0.19845	0.042137	0	0.245891	0	0.0363986	7.02446	0.0800103	0	10.044	10.0678	0.0438921	0
SLAMF7	chr1:160709076-160724601	0	0.869021	0.0396305	0.583775	0	0	0.187307	0.0142358	0.0140282	11.1169	0.135183	0.0146119	20.7849	19.667	0.101503	0
LY9	chr1:160765927-160798045	0	0.0142093	0	0.466921	0.041487	0	0.0720398	0	0	2.88097	0.075461	0	3.10321	2.04745	0.152047	0
CD244	chr1:160799949-160832692	0	0.0178721	0	0	0	0	0	0	0	0.075732	0	0	0.227339	0.185153	0	0
ITLN1	chr1:160846329-160854960	0	0	0	0	0	0	0	0	0	0.0770375	0	0	0	0	0	0
ITLN2	chr1:160914815-160924589	0	0	0	0	0	0	0	0	0	0	0	0	0	0	0	0
DCAF8	chr1:160185504-160232350	1.30033	2.05736	1.52459	1.82204	1.21721	1.69649	1.74112	1.50613	1.13692	1.92987	1.52671	1.45005	1.8532	1.39284	2.1045	1.26717
TSTD1	chr1:161007421-161008774	7.2575	7.08637	5.52628	6.42601	6.02578	6.59432	5.49334	8.19801	6.7747	1.96426	7.31449	7.95127	3.44825	0.856986	5.54093	6.69563
PEX19	chr1:160246598-160254941	1.15363	1.55557	0.960477	1.60974	1.39599	1.313	1.15348	1.25052	1.14446	1.61233	1.48167	1.48397	1.8374	1.27813	1.04874	1.19985
USF1	chr1:161009040-161015757	0.750517	1.17411	0.650558	0.976708	0.67494	1.01568	0.911541	0.689891	0.61534	3.54054	0.967973	0.863678	3.55597	3.09159	0.670506	0.901944
F11R	chr1:160965000-160991133	4.92326	3.55794	3.39902	3.37846	4.10118	3.99696	3.08889	4.00676	4.09137	7.81385	4.92288	5.09286	5.31168	5.20385	3.97412	5.14068
KLHDC9	chr1:161068150-161070138	0.0606024	0.444985	0.508381	0.290935	0.499885	0.704622	0.567698	0.471047	0.441835	0.048876	0.357802	0.570053	0.260005	0	0.41957	0.385111
PVRL4	chr1:161040780-161059385	1.34692	0.57738	0.776225	0.896495	0.549091	1.84062	1.0306	1.21108	1.45796	1.12672	1.20734	1.52672	0.908548	0.656578	0.933731	1.64472
UFC1	chr1:161123533-161128646	6.38276	9.18817	4.28109	9.19872	6.30399	6.3936	7.74771	5.72862	4.15299	4.11578	5.44346	5.50158	4.80006	2.78516	7.57257	5.08186
USP21	chr1:161129253-161135516	0.534079	0.706384	0.328315	0.403721	0.371301	0.586449	0.486003	0.451603	0.345956	0.52038	0.475703	0.45742	0.650079	0.475337	0.45343	0.424224
ARHGAP30	chr1:161016731-161039760	0.0159148	0.233607	0.0433977	0.111263	0	0	0.0733801	0.0107393	0	4.91532	0.0396838	0.0447062	4.8382	4.76398	0.0537701	0
PPOX	chr1:161136180-161141010	0.617134	0.81316	0.57374	1.10563	0.829274	0.403155	0.588695	0.635193	0.374542	0.498911	0.682519	0.540742	0.67312	0.784634	0.87363	0.615007
ADAMTS4	chr1:161159537-161168845	0	0.0360739	0.0386865	0.0443228	0.0256599	0.0160323	0.0464852	0.0109062	0.0105661	0.0263879	0	0.0111025	0.013751	0	0.0708362	0
NDUFS2	chr1:161169104-161184184	5.12995	8.35201	3.75582	9.26024	5.08249	5.27268	6.672	5.07061	4.38658	4.7233	4.56064	4.99399	4.9154	3.19505	8.01089	4.13724
FCER1G	chr1:161185086-161189038	0	3.30529	0	3.02468	0	0.106414	1.02261	0.233887	0	52.6773	0.584239	0	68.8605	56.5012	0.834331	0.0829959
APOA2	chr1:161192082-161193418	0	0	0	0	0	0	0	0.0943745	0	0	0	0	0	0	0	0
B4GALT3	chr1:161141099-161147758	2.00427	1.83287	1.53166	2.09076	1.51554	2.10208	1.42997	1.73642	1.62767	1.14223	1.97051	2.04778	0.837217	0.865937	1.84009	1.60148
PCP4L1	chr1:161228516-161255240	3.10572	2.23423	3.38004	3.50129	4.02551	3.79841	2.08721	2.72173	2.38122	0.431153	3.4359	3.79292	0.421688	0.0581102	1.41835	3.61965
MPZ	chr1:161274524-161279762	0	0.0206226	0.0212751	0	0.0547845	0	0.0513126	0	0	0	0	0	0	0.079281	0	0
PFDN2	chr1:161070345-161087866	2.23201	3.38356	1.89774	2.75927	2.04651	1.92313	1.39116	1.9961	1.40172	3.13553	1.78698	1.28781	2.01919	2.53625	1.92067	1.39125
DEDD	chr1:161090768-161102478	1.20877	2.20168	0.99341	2.01479	1.39104	1.30899	1.62045	1.3155	1.38954	2.27364	1.12579	1.15635	1.96878	1.78966	1.74608	1.22115
NIT1	chr1:161087861-161095235	0.99396	1.25641	0.630921	1.01219	1.02067	0.940897	1.07662	0.806549	1.00204	1.4641	0.549159	0.733524	1.05447	1.15271	0.947489	0.710996
FCGR2A	chr1:161475204-161489360	0.0982134	0.561554	0.0619711	0.518745	0	0	0.203361	0.0167984	0	20.0675	0.111208	0	10.9724	11.1249	0.0788222	0
HSPA6	chr1:161494035-161496687	1.16511	0.0976976	0.137304	0.363156	0.0540005	0.0511367	0.0370704	0.0370636	0	2.42769	0.0853599	0.0585296	1.59409	2.05072	0.0598135	0.309335
TOMM40L	chr1:161195832-161200407	1.01106	1.03595	0.97741	1.20917	1.40958	1.25246	0.951664	1.26644	1.03793	0.978434	0.958395	1.20446	0.931831	0.496248	1.125	0.942454
NR1I3	chr1:161199455-161208000	0.0718129	6.72822e-11	1.66315e-10	0.07511	0.057512	3.77556e-09	1.04858e-09	0.0503617	0.0456689	0.0427992	9.38115e-12	3.47103e-08	5.47384e-10	5.07749e-12	6.31381e-10	4.29136e-10
FCGR3A	chr1:161511550-161520413	0.026109	0.645364	0.0756572	0.692138	0.0201514	0	0.106045	0.0908928	0	18.409	0.17571	0.018765	10.4531	10.1555	0.0945479	0
FCGR2C	chr1:161551128-161570032	0.0363393	0.212984	0	0.402518	0	0	0.137765	0.025213	0	16.4447	0	0	7.81112	8.60117	0.0292335	0
FCGR3B	chr1:161592987-161601158	0	0.232583	0.0158841	0.134656	0	0	0.0564923	0	0	3.90365	0.0180515	0	1.71119	1.68904	0.0202232	0
HSPA7	chr1:161575848-161578341	0.035374	0.0569902	0.0499317	0.107202	0.0148377	0	0.019527	0.0407153	0	5.94316	0.0557718	0.0384618	2.19244	3.52696	0.00368763	0.0161885
RPL31P11	chr1:161653494-161655042	0	0	0	0	0	0	0	0	0	0.0286662	0	0	0	0.0560518	0	0
FCRLA	chr1:161676761-161684142	0	0	0	0	0	0	0	0	0	0.083318	0	0	0.0236115	0.111161	0	0
SDHC	chr1:161284165-161334535	2.44414	4.1923	2.07295	4.38674	2.67537	2.58696	3.36093	2.3727	2.25195	1.89068	2.69303	2.78364	2.78698	1.74418	3.56282	2.38284
C1orf192	chr1:161334520-161337664	0	0.100495	0	0.137944	0	0.217943	0.114046	0.0515545	0	0.0605281	0.0553917	0.0552006	0.141938	0	0.0613473	0.055382
FCRLB	chr1:161692456-161697933	0	0	0	0	0	0	0	0	0	0.284615	0	0	0.653552	0.297863	0	0
DUSP12	chr1:161719580-161726952	0.147964	0.458244	0.21939	0.266234	0.489995	0.31083	0.152156	0.298858	0.200519	0.421767	0.539661	0.280149	0.529747	0.510536	0.396869	0.211903
ATF6	chr1:161736083-161928852	1.52194	1.43483	1.24846	1.16369	1.69894	1.56526	0.954905	1.7234	1.50501	2.35714	1.57018	1.49935	1.96521	2.15134	0.648144	2.02857
NOS1AP	chr1:162039580-162339813	0	0.0454193	0.0473731	0	0	0	0	0.00981711	0.0435222	0.0116691	0.010446	0	0	0	0	0.0102641
MIR4654	chr1:162126896-162126972	0	0	0	0	0	0	0	0	0	0	0	0	0	0	0	0
MIR556	chr1:162312335-162312430	0	0	0	0	0	0	0	0	0	0	0	0	0	0	0	0
C1orf111	chr1:162343514-162346644	0	0	0	0	0	0	0	0	0	0	0	0	0	0	0	0
FCGR2B	chr1:161632904-161648444	0	0.143421	0	0.124613	0	0	0.0920587	0	0	6.73845	0	0	3.45068	3.40915	0.0244364	0
OLFML2B	chr1:161952981-161993644	0.0382958	0.163085	0.0114568	0.104097	0	0	0.0543592	0.0128654	0	3.70031	0.0407365	0	3.2373	3.44663	0.0140294	0
SH2D1B	chr1:162365055-162381928	0	0	0	0	0	0	0	0	0	0	0	0	0	0	0	0
UAP1	chr1:162531295-162569633	1.95907	5.99045	1.7401	4.91019	2.56074	2.51595	4.30448	2.46621	1.99025	1.4131	2.02609	2.44952	1.20777	0.61931	5.39091	1.90799
DDR2	chr1:162602227-162750247	0	0.114382	0.0554032	0.217686	0.0613699	0.0186911	0.211411	0.0539233	0.0524347	0.0625983	0.117363	0.0860023	0.0947089	0	0.144508	0
HSD17B7	chr1:162760495-162782608	0.716029	2.67974	0.992631	3.65162	0.893776	0.694385	2.28605	1.62968	1.16417	0.716021	1.03833	1.17305	0.76234	0.47883	2.0645	1.12197
C1orf226	chr1:162348695-162356608	0.014655	0.0339364	0	0	0	0	0.0109146	0.0100148	0.115547	0.0117096	0	0.0686897	0	0.0439602	0.0460055	0.0104006
C1orf110	chr1:162824086-162838605	0	0	0	0	0	0	0	0	0	0	0	0	0	0	0	0
RGS4	chr1:163038395-163046592	0	0	0	0	0	0	0	0	0	0	0	0	0	0	0	0
NUF2	chr1:163291722-163325553	0.0290187	0.150944	0	0.0268958	0	0.0260949	0	0.0202476	0	0.0888336	0	0	0.0274741	0.0852487	0.0256404	0
CD84	chr1:160510883-160549306	0.0307097	0.230149	0.0196171	0.141117	0	0	0.0310148	0	0	5.19944	0.0349285	0	4.33723	4.90083	0.0451287	0
LMX1A	chr1:165171103-165325952	0	0	0	0	0	0	0	0	0	0	0	0	0	0	0	0
RXRG	chr1:165370158-165414592	0	0	0	0	0	0	0	0	0	0	0	0	0.0477174	0	0	0
LOC400794	chr1:165446078-165551341	0	0	0	0	0	0	0	0	0	0	0	0	0	0	0	0
LRRC52	chr1:165513477-165533185	0	0	0	0	0	0	0	0	0	0	0	0	0	0	0	0
MGST3	chr1:165600109-165625372	5.17732	4.20744	3.4954	4.68439	4.32994	4.83415	3.65067	3.65487	3.16772	4.73236	4.21802	3.51933	5.11548	4.54019	2.01824	3.53268
ALDH9A1	chr1:165631448-165667900	17.1515	24.5221	15.2886	13.1046	20.3484	22.0662	22.0196	20.9528	19.142	6.54322	17.8024	18.5006	2.88138	1.43981	22.6766	21.3755
LOC440700	chr1:165667986-165679199	0	0	0	0	0	0	0	0	0	0	0	0	0	0	0	0
RGS5	chr1:163112088-163172963	0.0125795	0.0375588	0.00749059	0.0543007	0.0388104	0	0.0658083	0.0403356	0.0323616	0.00956113	0.0385035	0.0366011	0.0122031	0.0094176	0.0456714	0.0444116
TMCO1	chr1:165693527-165738135	1.45562	1.23041	1.05292	0.976229	0.947097	1.18043	1.26416	0.782706	0.774027	1.18357	1.04955	1.09972	1.20581	0.832165	0.824543	1.30487
FAM78B	chr1:166039255-166135958	0.470274	0.341832	0.238574	0.192979	0.137093	0.336456	0.510954	0.258808	0.286306	0.0354012	0.279809	0.270374	0	0	0.481991	0
MIR921	chr1:166123979-166124035	0	0	0	0	0	0	0	0	0	0	0	0	0	0	0	0
FMO9P	chr1:166573152-166594473	0	0	0	0	0	0	0	0	0	0	0	0	0	0	0	0
UCK2	chr1:165796731-165880855	1.2046	1.87766	1.28382	1.4093	1.11068	1.35432	1.43832	1.55698	1.42008	0.862589	1.62882	1.44895	0.865908	0.903732	1.95826	1.52486
MIR3658	chr1:165877157-165877213	0	0	0	0	0	0	0	0	0	0	0	0	0	0	0	0
TADA1	chr1:166825748-166845654	0.148156	0.139518	0.0378521	0.247041	0.0892374	0.263754	0.0912506	0.122743	0.143308	0.251692	0.0866178	0.230589	0.216897	0.19789	0.123733	0.194292
ILDR2	chr1:166882440-166944561	0	0	0	0	0	0	0	0	0	0	0	0	0	0	0	0
MAEL	chr1:166958518-166991447	0	0	0	0	0.0290911	0	0	0	0	0	0	0	0	0	0	0
GPA33	chr1:167022081-167059868	0	0	0	0	0	0	0	0	0	0.0182697	0	0	0	0.0515231	0	0
DUSP27	chr1:167064086-167098402	0	0	0	0	0	0	0	0	0	0	0	0	0	0	0	0
POGK	chr1:166808723-166823709	0.495456	0.649838	0.377534	0.848785	0.507211	0.604354	0.811251	0.552864	0.47644	1.71054	0.633583	0.473506	1.48115	1.30464	0.851475	0.623424
CD247	chr1:167399876-167487847	0	0	0	0	0	0	0	0	0	0	0	0	0.3348	0.128104	0	0
CREG1	chr1:167510250-167523056	11.2876	7.09507	6.53888	4.73823	8.06138	9.19186	5.25454	5.1515	4.73691	24.0982	6.85855	6.20261	22.7062	23.7157	4.5077	6.20156
RCSD1	chr1:167599473-167675486	1.98001	0.808768	0.88011	1.05793	0.738362	1.57604	0.539453	0.550558	0.366138	2.01213	1.54579	0.871272	1.67332	1.56427	0.558991	0.544918
PBX1	chr1:164528596-164821060	1.29058	1.91406	1.49433	1.83696	2.20435	1.98113	1.91963	1.66873	1.21259	0.292988	1.66802	1.81579	0.310872	0.0479366	2.51572	1.30038
LOC100505795	chr1:164738352-164743878	0	0	0	0	0	0	0	0	0	0	0	0	0	0	0	0
MPZL1	chr1:167691186-167761156	9.28422	6.17213	5.63394	5.0719	6.82121	7.18898	6.50697	6.01105	5.80136	2.28012	8.6462	9.54063	1.8307	1.41653	5.84832	6.54266
ADCY10	chr1:167778624-167883453	0.0118544	0	0	0.0495317	0.00830095	0.0108014	0	0.0327182	0	0	0	0.00843637	0	0.00880691	0	0
GPR161	chr1:168053996-168105624	0	0.0145941	0.0152186	0	0	0	0	0	0	0.0201124	0	0	0.0872286	0.0188377	0	0
TIPRL	chr1:168148170-168171351	1.35934	2.61515	1.33922	2.34234	1.08743	1.30494	2.11141	1.0501	1.04681	1.53207	1.22948	1.38215	1.5847	1.44341	1.58979	0.863211
SFT2D2	chr1:168195254-168212088	0.0955151	0.334071	0.124771	0.434861	0	0.0885391	0.305271	0	0.130224	0.896132	0	0.136163	1.21626	1.21105	0	0
ANKRD36BP1	chr1:168214818-168216668	0.0276265	0.137626	0.0534341	0.0765918	0.0603772	0.0242469	0.165685	0.0567507	0	0.532997	0.0196472	0.0196651	0.542718	0.377532	0.164217	0.0198599
TBX19	chr1:168250277-168283664	0	0.0145172	0.0287895	0.0427309	0	0	0.0348289	0	0.0155413	0.128342	0	0	0.0620557	0.052135	0	0
MIR557	chr1:168344761-168344859	0	0	0	0	0	0	0	0	0	0	0	0	0	0	0	0
LOC100505918	chr1:168369426-168391894	0	0	0	0	0	0	0	0	0	0	0	0	0.0439292	0	0	0
XCL2	chr1:168510002-168513235	0	0	0	0	0	0	0	0	0	0	0	0	0.0702123	0	0	0
XCL1	chr1:168545710-168551315	0	0	0	0	0	0	0	0	0	0	0	0	0.0111425	0	0	0
DPT	chr1:168664694-168698442	0	0	0	0	0	0	0	0	0	0	0	0	0	0	0	0
MGC4473	chr1:168756178-168762126	0	0	0	0	0	0	0	0	0	0	0	0	0	0	0	0
ATP1B1	chr1:169075946-169101960	0.114559	0.151741	0.0427239	0.0934272	0.025264	0.0886478	0.0261454	0.0246369	0	3.15336	0.0245011	0.0234942	2.4822	2.68852	0	0
NME7	chr1:169101768-169337186	0.372701	1.32564	0.400109	0.570319	0.379052	0.622284	0.425727	0.220314	0.497801	0.533382	0.455361	0.557359	1.44051	0.935677	0.638884	0.331955
BLZF1	chr1:169337193-169365780	0.392603	0.577828	0.375997	0.626242	0.481299	0.528779	0.717593	0.200424	0.346401	0.586789	0.29124	0.226518	0.416934	0.352912	0.465729	0.290569
C1orf114	chr1:169364113-169396670	0	0	0	0	0	0	0	0	0	0	0	0	0	0	0	0
SLC19A2	chr1:169433148-169455208	0.194572	0.275078	0.0712389	0.304273	0.152484	0.426007	0.243176	0.258178	0.122604	0.572226	0.180361	0.139304	0.746523	0.537847	0.225435	0.384907
F5	chr1:169481191-169555769	0	0.00402673	0	0	0	0	0	0	0	0.0274538	0	0	0.016316	0.0221751	0	0
SELP	chr1:169558087-169599377	0	0	0	0	0	0	0	0	0	0	0	0	0	0	0	0
SELL	chr1:169659805-169680843	0.0246288	0.116049	0.0176292	0	0	0	0.0185506	0	0	0.321789	0	0	0.463988	0.239304	0	0
SELE	chr1:169691780-169703220	0	0	0	0	0	0	0	0	0	0	0	0	0	0	0	0
METTL18	chr1:169761672-169764031	0.0794998	0.17407	0.0527048	0.186024	0.182181	0.0357814	0.0637079	0.112137	0.0282162	0.15289	0.147493	0.144864	0.0758625	0.146712	0.106393	0.234377
UHMK1	chr1:162466963-162499419	0.537179	1.43023	0.648106	1.3469	1.01344	1.10324	1.17521	0.85431	0.635276	1.57966	0.748538	0.674318	1.69806	1.46398	1.28538	0.767475
C1orf112	chr1:169764549-169822229	0.0475878	0.142931	0.076993	0.168721	0.0547716	0.0212709	0.0176384	0.0312148	0.0312774	0.0340034	0.0171894	0.0330738	0.427997	0.226605	0.066443	0.120931
SCYL3	chr1:169821803-169863076	0.127835	0.247063	0.0788375	0.165852	0.110591	0.152298	0.359654	0.205488	0.180895	0.272052	0.176489	0.118513	0.454759	0.311883	0.196698	0.234207
BRP44	chr1:167885912-167906307	6.47161	5.9697	4.56206	6.82698	6.1806	7.26499	8.97522	6.0732	5.06151	2.49862	6.29627	6.44733	2.47107	1.55694	5.20919	4.97259
DCAF6	chr1:167905796-168045083	1.90336	1.62196	1.50029	2.28277	2.40744	2.24435	2.39255	1.99713	1.48585	1.48566	1.67903	1.6668	1.22949	0.953938	1.70312	2.04176
METTL11B	chr1:170115187-170136923	0	0	0	0	0	0	0	0	0	0	0	0	0	0	0	0
MIR3119-1	chr1:170120518-170120603	0	0	0	0	0	0	0	0	0	0	0	0	0	0	0	0
LOC284688	chr1:170240545-170253349	0	0	0	0	0	0	0	0	0	0	0	0	0	0	0	0
PRRX1	chr1:170633312-170708541	0	0	0	0	0	0	0	0	0	0.0130681	0	0	0.0713744	0.0509332	0	0
C1orf129	chr1:170904611-171033906	0	0	0	0	0	0	0	0	0	0	0	0	0	0	0	0
FMO3	chr1:171060017-171086959	0	0	0	0.0289866	0	0	0	0	0	0	0	0	0	0	0	0
MIR1295	chr1:171070868-171070947	0	0	0	0	0	0	0	0	0	0	0	0	0	0	0	0
FMO6P	chr1:171106878-171130702	0	0	0	0	0	0	0	0	0	0.0236826	0	0	0	0	0	0
FMO2	chr1:171154387-171181822	0	0.0548211	0	0.0119789	0	0	0	0	0	0	0	0	0	0	0.0111119	0
FMO1	chr1:171217662-171255113	0	0	0	0	0	0	0	0	0	0	0	0	0	0	0	0
FMO4	chr1:171283485-171311223	0.138912	0.431137	0.125357	0.384325	0.168795	0.27873	0.489969	0.24928	0.229354	0.278733	0.142598	0.119968	0.180148	0.266838	0.305417	0.040487
TOP1P1	chr1:171308034-171310463	0	0.0191424	0	0.0251447	0	0.0242616	0.0424571	0	0	0.102404	0	0.0193925	0.0253211	0.0200173	0.0234625	0
GORAB	chr1:170501262-170522974	0.270683	0.284863	0.157865	0.273178	0.198966	0.240743	0.188718	0.220413	0.12465	0.404033	0.126644	0.124539	0.271113	0.353865	0.206638	0.0929425
MYOC	chr1:171604556-171621773	0	0	0	0	0	0	0	0	0	0	0	0	0	0	0	0
KIFAP3	chr1:169890469-170043879	0.609111	0.703165	0.381212	0.643232	0.459056	0.472578	0.417415	0.587006	0.318337	0.618359	0.615044	0.484337	0.509188	0.631474	0.377899	0.443129
METTL13	chr1:171750760-171766856	0.497145	0.5538	0.470071	0.71932	0.374273	0.917674	0.663087	0.5608	0.473526	0.828208	0.538931	0.520718	1.00674	0.717371	0.669105	0.750464
PRRC2C	chr1:171454665-171562650	0.291756	0.576498	0.236657	0.750949	0.367834	0.367788	0.468778	0.371833	0.410599	1.8002	0.326167	0.307384	1.57782	1.57383	0.918657	0.4396
VAMP4	chr1:171669295-171711379	0.560982	0.337592	0.604737	0.590477	0.566605	0.454891	0.519237	0.287087	0.314991	0.608695	0.839283	0.553202	0.722738	0.483372	0.668301	0.735709
C1orf105	chr1:172389827-172437969	0.0574193	0	0.0365144	0.104754	0.0426573	0.102248	0	0	0	0	0	0	0	0	0	0
PIGC	chr1:172410596-172413230	0.973752	0.900463	0.808843	0.946288	1.02233	1.10838	0.753032	0.943098	0.76814	0.952755	1.07978	0.997845	1.09604	0.584282	0.530566	0.562395
FASLG	chr1:172628184-172636012	0	0	0	0	0	0	0	0	0	0.0250525	0	0	0	0	0	0
TNFSF18	chr1:173010359-173020103	0	0	0	0	0	0	0	0	0.0605376	0.06497	0	0	0	0.0612017	0	0
TNFSF4	chr1:173152869-173176471	0	0.0135385	0.0249979	0.0180134	0	0	0.0301869	0.0134963	0.0272757	0	0.014181	0.0137361	0.0179337	0.0142613	0	0
LOC100506023	chr1:173204198-173446294	0.0125599	0	0	0.0466752	0.00971162	0.0112154	0.0301802	0.0440261	0.00880703	0.0194093	0	0.00899826	0	0.00940096	0.0219656	0
LOC646870	chr1:173331509-173332878	0	0	0	0	0	0	0	0	0	0	0	0	0	0	0	0
PRDX6	chr1:173446485-173457946	6.56884	8.48338	4.64518	10.2367	7.22207	6.16512	7.11795	5.75193	5.57221	5.32726	5.18714	5.52901	6.73021	3.9057	7.74623	7.69457
SLC9A11	chr1:173469603-173572233	0	0	0	0	0	0	0	0	0	0	0	0	0	0	0	0
ANKRD45	chr1:173577474-173639001	0	0	0	0	0	0	0	0	0	0	0	0.0187389	0	0	0	0
LOC730159	chr1:173604660-173606272	0	0	0	0	0	0	0	0	0	0	0	0	0	0	0	0
KLHL20	chr1:173684079-173755840	0.127185	0.295127	0.116874	0.332224	0.18245	0.168128	0.278916	0.177827	0.100789	0.426799	0.147764	0.0915777	0.283683	0.288728	0.250729	0.158101
CENPL	chr1:173768687-173793777	0.119069	0.133999	0.0195094	0.109669	0.0229704	0.0268279	0.0207438	0	0	0.0817799	0.0222316	0	0.111622	0.247183	0.138957	0.155394
DARS2	chr1:173793796-173827682	0.198246	0.508654	0.218906	0.668931	0.385164	0.357032	0.491389	0.349267	0.316111	0.540847	0.314316	0.2848	0.643046	0.438985	0.443227	0.325808
LOC100506046	chr1:173832385-173833079	0.121957	0	0.0799329	0.111602	0.092994	0.107436	0.096955	0.0831039	0.0838623	0.271968	0.0908065	0.0858203	0.112848	0	0.645171	0
GAS5	chr1:173833038-173837125	8.80042	95.9272	3.55001	21.5473	10.0007	4.63806	14.3755	4.16968	2.48984	6.45085	6.17568	4.44693	8.61859	5.94748	21.1994	4.1893
SNORD81	chr1:173833312-173833355	0	0	0	0	0	0	0	0	0	0	0	0	0	0	0	0
SNORD47	chr1:173833506-173833583	0	0	0	0	0	0	0	0	0	0	0	0	0	0	0	0
SNORD80	chr1:173833970-173834041	0	0	0	0	0	0	0	0	0	0	0	0	0	0	0	0
SNORD79	chr1:173834487-173834568	0	0	0	0	0	0	0	0	0	0	0	0	0	0	0	0
SNORD78	chr1:173834770-173834824	0	0	0	0	0	0	0	0	0	0	0	0	0	0	0	0
SNORD44	chr1:173835105-173835166	0	0	0	0	0	0	0	0	0	0	0	0	0	0	0	0
SNORD77	chr1:173835448-173835509	0	0	0	0	0	0	0	0	0	0	0	0	0	0	0	0
SNORD76	chr1:173835772-173835853	0	0	0	0	0	0	0	0	0	0	0	0	0	0	0	0
SNORD75	chr1:173836016-173836076	0	0	0	0	0	0	0	0	0	0	0	0	0	0	0	0
SNORD74	chr1:173836811-173836883	0	0	0	0	0	0	0	0	0	0	0	0	0	0	0	0
ZBTB37	chr1:173837492-173855774	0	0.0918886	0.0263491	0	0.100444	0.0232565	0.154059	0.0756934	0.0879803	0.251065	0.0975661	0	0.15212	0.222192	0.123076	0.0300387
SERPINC1	chr1:173872941-173886516	0	0	0	0	0	0	0	0	0	0	0	0	0	0	0.0300434	0
C1orf9	chr1:172502259-172580973	1.27256	1.88403	1.38203	1.09789	1.19427	1.94994	1.15402	2.65137	3.02974	0.574882	1.47632	1.24393	0.568293	0.442574	2.74173	1.94348
RABGAP1L	chr1:174128633-174927327	0.872508	1.46459	0.78327	0.809054	1.64466	0.821673	1.45885	1.28133	1.2101	2.04855	1.08676	1.39395	1.5167	1.06905	1.53772	0.848488
GPR52	chr1:174417211-174418683	0	0	0	0	0	0	0	0	0	0	0	0	0	0	0	0
DNM3	chr1:171810620-172381857	0.0964196	0.204693	0.258202	0.50373	0.261663	0.233031	0.474467	0.157425	0.30652	0.119127	0.15323	0.161152	0.031893	0.0584363	0.277302	0.252233
DNM3OS	chr1:172107723-172113975	0	0	0	0	0.00874508	0	0	0	0	0	0	0	0	0	0	0
MIR214	chr1:172107937-172108047	0	0	0	0	0	0	0	0	0	0	0	0	0	0	0	0
MIR199A2	chr1:172113674-172113784	0	0	0	0	0	0	0	0	0	0	0	0	0	0	0	0
MIR3120	chr1:172107947-172108028	0	0	0	0	0	0	0	0	0	0	0	0	0	0	0	0
MRPS14	chr1:174982093-174992591	0.533962	0.683939	0.302758	0.931445	0.620358	0.3269	0.688038	0.543808	0.255487	0.454097	0.496161	0.586343	0.6683	0.27317	0.703892	0.465829
TNN	chr1:175036993-175117202	0	0	0	0	0	0	0	0	0	0	0	0	0	0	0	0
CACYBP	chr1:174968570-174981163	0.82899	1.39624	0.77031	1.04357	1.25198	1.26757	1.01178	0.884339	0.827081	1.39896	0.901564	0.944341	0.977397	1.08314	1.01324	1.09167
TNR	chr1:175291934-175712752	0	0	0	0	0	0	0	0	0	0	0	0	0	0	0	0
RFWD2	chr1:175913966-176176370	0.949761	1.53199	0.926543	1.68224	1.7144	1.76871	1.45254	1.24823	0.954581	1.63552	1.17945	1.41877	1.76024	1.32795	1.21982	1.58668
SCARNA3	chr1:175937532-175937676	0	0	0	0	0	0	0	0	0	0	0	0	0	0	0	0
PAPPA2	chr1:176432306-176811970	0	0	0	0.0486209	0	0	0	0	0	0	0	0	0	0	0	0
ASTN1	chr1:176830202-177134024	0	0.00496446	0	0.128437	0	0.00789807	0.0444519	0.0225218	0.047836	0.00658135	0.0331468	0.030546	0	0	0	0
MIR488	chr1:176998498-176998581	0	0	0	0	0	0	0	0	0	0	0	0	0	0	0	0
FAM5B	chr1:177140632-177251558	0.0175587	0.0210538	0	0	0	0	0.0513415	0.0237837	0	0.01404	0.0127242	0	0	0	0.0134256	0
SEC16B	chr1:177898241-177939050	2.00536	2.4794	1.98385	2.09725	2.05171	2.52248	1.26822	1.51414	1.49008	0.457872	2.24152	2.40753	0.357474	0.0840315	2.80518	2.7316
LOC730102	chr1:177975274-178007142	0.393173	0.385074	0.520605	0.323683	0.623472	0.868643	0.26933	0.528029	0.47357	0.288623	0.42041	0.620792	0.282588	0.343138	0.312621	0.687268
RC3H1	chr1:173900351-173962210	0.0903298	0.121503	0.0333653	0.102057	0.078315	0.10422	0.145229	0.112782	0.119173	0.514316	0.0381665	0.0597868	0.409793	0.380901	0.230778	0.0566904
C1orf49	chr1:178482211-178492635	0	0	0	0	0	0	0	0	0	0	0	0	0	0	0	0
C1orf220	chr1:178511930-178518024	0	0	0	0	0.0175849	0	0	0	0	0.0178783	0	0	0	0.0170259	0	0
MIR4424	chr1:178646883-178646969	0	0	0	0	0	0	0	0	0	0	0	0	0	0	0	0
KIAA0040	chr1:175126122-175162229	0.0133717	0.273442	0.0380567	0.0481208	0.064571	0	0.15311	0.0418878	0.0364407	0.769135	0.0701502	0.0374797	0.783976	0.709373	0.201927	0.0575247
RALGPS2	chr1:178694299-178889237	0.0573219	0.124802	0.0603212	0.0749534	0.120806	0.131416	0.108994	0.0883955	0.0744008	0.0690819	0.119046	0.0332378	0.053772	0.0169066	0.100772	0.0505323
ANGPTL1	chr1:178818669-178840215	0	0	0.010778	0	0.0123717	0.0146699	0	0.0114815	0	0.0124561	0	0	0.0154988	0	0	0.0360393
FAM20B	chr1:178995073-179045702	0.552911	0.637562	0.618604	0.813543	0.700462	0.56207	0.882149	0.650354	0.631946	0.850008	0.764421	0.788737	0.766812	0.721754	0.947145	0.67013
TOR3A	chr1:179051111-179065129	0.554988	0.641009	0.731571	0.762365	0.556603	0.86243	0.38071	0.631137	0.390727	5.76615	0.719525	0.694037	4.70631	5.55458	0.240754	0.60695
SOAT1	chr1:179263016-179324453	0.303845	0.853491	0.604832	0.980783	0.723183	0.733721	0.79446	1.10997	0.839553	11.7418	0.942438	0.670903	12.862	12.0504	0.682656	0.819867
AXDND1	chr1:179334854-179523870	0	0.0206036	0.00960957	0.0400742	0	0	0	0.0100481	0	0	0	0	0	0	0	0
NPHS2	chr1:179519673-179545084	0	0	0	0	0	0	0	0	0	0	0	0	0	0	0	0
TDRD5	chr1:179560747-179660407	0.155948	0.192617	0.0984409	0.119537	0.138821	0.25731	0.158784	0.13765	0.186538	0.0497725	0.0940754	0.176268	0	0.0185973	0.256564	0.234197
FAM163A	chr1:179712297-179785333	0	0	0	0	0	0	0	0	0	0	0	0	0	0	0	0
POU2F1	chr1:167190065-167396582	0.0794254	0.13411	0.0387931	0.10448	0.0576812	0.0858926	0.0590397	0.045308	0.080001	0.184069	0.0623493	0.0564684	0.239293	0.241665	0.115459	0.0402611
TOR1AIP1	chr1:179851419-179889211	1.19595	1.21444	0.863925	1.08034	1.10868	1.4387	1.44503	0.904068	0.871546	1.76005	1.45265	1.31118	1.41593	1.10382	1.35125	1.49411
LOC100302401	chr1:178060642-178063128	0	0.0676687	0.0214404	0.0308454	0.116159	0.145521	0.104257	1.98926e-81	5.60112e-167	0.101555	0	0.0468827	0.060204	0.0727666	0.0281393	0.120403
RASAL2	chr1:178062863-178448648	0.413647	0.50127	0.476072	0.446069	0.541252	0.579082	0.605607	0.517611	0.360471	0.687113	0.513732	0.416884	0.593844	0.622796	0.614127	0.661768
QSOX1	chr1:180123967-180167169	35.7396	14.0294	18.819	10.2414	16.1715	20.9977	14.298	15.967	14.4211	7.83011	28.7007	28.6397	8.00207	5.98128	19.6884	15.2906
FLJ23867	chr1:180167143-180169859	4.48853	2.17839	2.03236	1.1895	1.69377	1.71895	1.57918	1.14113	1.35654	0.492187	3.05711	3.22706	0.386504	0.202454	3.25481	1.71641
LHX4	chr1:180199432-180244188	0	0	0	0	0	0	0	0	0	0.0513614	0.0230116	0	0	0.0481494	0	0
LOC100527964	chr1:180238797-180243816	0	0	0	0.0226105	0	0	0.0357722	0.016576	0	0.114545	5.98633e-08	0	0.0431339	0.0538295	0	0
ACBD6	chr1:180257351-180472022	2.35039	4.47413	2.93756	4.39242	3.93255	3.61606	3.40496	3.91057	3.35842	3.77688	3.40875	3.41469	3.11018	2.76094	3.69886	2.34233
MIR3121	chr1:180407448-180407525	0	0	0	0	0	0	0	0	0	0	0	0	0	0	0	0
CEP350	chr1:179923907-180084015	0.0952144	0.140651	0.107973	0.226698	0.0970404	0.161897	0.193047	0.183536	0.135448	0.489952	0.153488	0.098654	0.393458	0.439489	0.207312	0.128347
KIAA1614	chr1:180882312-180915239	0.076257	0.023796	0.0347889	0.0679421	0.0238928	0.0463651	0.0212105	0.0399182	0.0288272	0.0617489	0.0318782	0.0101997	0.0499967	0.045322	0.0211348	0
STX6	chr1:180942175-180992046	0.822368	1.62044	0.960858	1.55717	1.21343	1.39479	1.39945	0.91458	0.920027	1.08245	1.20849	1.06883	1.27934	0.997866	1.50821	1.07072
TOR1AIP2	chr1:179809101-179846941	0.559662	0.681224	0.435361	0.746547	0.430758	0.775323	0.727069	0.583704	0.719023	0.871771	0.496785	0.546687	0.78113	0.675463	0.658005	0.621944
IER5	chr1:181057637-181059979	2.39934	0.800714	0.60386	0.758109	0.66692	2.31188	0.596489	0.943198	0.604251	4.56914	1.34449	0.848382	3.91363	3.58203	0.485107	1.59932
XPR1	chr1:180601145-180859415	0.0418069	0.10371	0.0522075	0.0901292	0.0436959	0.0804003	0.127721	0.0939217	0.0258214	0.710565	0.106203	0.0934747	0.854355	0.539677	0.0374397	0.0267667
ZNF648	chr1:182023704-182030847	0	0	0	0	0	0	0.0139089	0	0	0	0	0	0	0	0	0
GLUL	chr1:182350838-182361341	3.06654	15.0414	3.48898	14.4434	9.99781	4.37902	9.25739	4.67199	4.31348	53.3241	5.9131	5.68486	53.4601	47.5055	8.09552	2.70215
TEDDM1	chr1:182367251-182369751	0	0	0	0	0	0	0	0	0	0	0	0	0	0	0	0
NCRNA00272	chr1:182376755-182383948	0	0	0	0	0	0	0	0	0	0	0	0	0	0	0	0
RGSL1	chr1:182419255-182529732	0	0	0	0	0	0	0	0	0	0	0	0	0	0	0	0
RNASEL	chr1:182542768-182558394	0.16792	0.320621	0.221447	0.345083	0.392519	0.478114	0.476742	0.319944	0.304267	0.557325	0.223012	0.26893	0.30625	0.312371	0.204187	0.392907
RGS16	chr1:182567757-182573548	0.0243252	0.0141392	0	0	0	0.0232828	0.0710278	0	0.0158289	0.0969535	0	0	0.0853275	0.0903851	0	0.017174
LOC284648	chr1:182584274-182585764	0	0	0	0.0381101	0	0	0	0	0	0	0	0	0	0	0	0
RGS8	chr1:182615791-182642067	0	0	0	0	0	0	0	0	0	0	0	0	0	0	0	0
NPL	chr1:182758583-182799519	0.159985	0.351186	0.0640322	0.409062	0.108013	0.0871041	0.263497	0.0895539	0.0882557	10.1064	0.0795229	0.109083	9.23762	10.2873	0.283992	0.0175374
DHX9	chr1:182808438-182857117	1.85112	3.77159	1.86722	3.47269	2.68177	2.79174	2.72986	2.64331	2.11111	2.44819	2.18138	2.20626	2.48699	1.81276	3.26665	2.08501
SHCBP1L	chr1:182868999-182922553	0	0	0	0	0	0	0	0	0	0	0	0	0	0	0	0
LAMC1	chr1:182992594-183114727	0	0	0.0095401	0.0139827	0.0235328	0.0213752	0.0228244	0.0314635	0.041141	0.1687	0.011062	0	0.164099	0.159726	0.00605593	0.0492002
LAMC2	chr1:183155173-183214262	0	0.00738944	0.0246779	0	0.0420769	0.0115208	0.060738	0.00687961	0.00668631	0	0.0288289	0.0340842	0.0483679	0	0	0.0320217
NMNAT2	chr1:183217371-183387634	0	0.00737127	0	0	0	0	0	0	0	0	0	0	0	0	0	0
MR1	chr1:181002560-181031074	0.239736	0.219713	0.248709	0.212678	0.258638	0.263602	0.303113	0.24436	0.241716	2.14951	0.239069	0.256769	1.80979	1.92932	0.151276	0.193817
NCF2	chr1:183524696-183560056	0.0245942	0.402206	0.0155255	0.69422	0.0182854	0	0.126801	0.0169205	0	6.80566	0.0948363	0.0181342	9.65062	7.77787	0.158736	0
ARPC5	chr1:183595331-183604985	3.33928	7.11112	2.75353	5.66881	4.24363	4.46747	5.0084	2.83512	2.26244	13.6599	4.03725	3.44381	14.7478	13.6667	4.51223	3.30493
RGL1	chr1:183605207-183897666	0.412923	0.64418	0.234262	0.573278	0.492619	0.672916	0.499893	0.408245	0.435635	2.1401	0.606612	0.531104	1.76303	1.95846	0.436542	0.463902
APOBEC4	chr1:183615410-183622448	0	0	0	0	0	0	0	0	0	0	0	0	0	0	0	0
SMG7	chr1:183441505-183523328	0.720023	1.18025	0.718132	1.06674	1.05712	0.942714	1.01035	0.783117	0.668343	1.22574	0.915049	0.941952	1.14889	0.843045	1.1409	0.785999
TSEN15	chr1:184020810-184043344	1.56964	2.5179	0.744305	2.599	1.98422	1.38461	1.7065	0.886038	1.35982	1.37747	1.34278	1.40607	2.12335	0.925883	2.1699	1.07563
GLT25D2	chr1:183904965-184006863	0.0500909	0.158462	0.11768	0.0575086	0.155722	0.105119	0.0280964	0.02587	0.0256351	0.177777	0.0640719	0.131732	0.0559163	0.0187699	0.0597589	0.04499
EDEM3	chr1:184659624-184724041	0.327856	0.71943	0.400545	0.548436	0.353407	0.492131	0.853196	0.497214	0.400033	0.939694	0.418493	0.407274	0.800054	0.714003	0.798759	0.442374
ABL2	chr1:179068461-179198819	0.0600134	0.209495	0.0972094	0.144385	0.0706896	0.0803918	0.305122	0.140979	0.0743268	0.685887	0.0827596	0.0693601	0.7817	0.72941	0.2287	0.0833069
RNF2	chr1:185014550-185071740	0.695016	0.975355	0.612174	1.4362	0.722027	0.901665	0.863799	0.715467	0.586105	0.756525	0.784521	0.633215	0.725326	0.739213	1.13681	0.803365
FAM129A	chr1:184760165-184943682	0.784565	0.802818	0.490286	0.686385	0.318219	0.419595	0.608243	0.459114	0.428119	2.10612	0.69744	0.559955	2.89248	2.8086	0.724593	0.5146
C1orf21	chr1:184356149-184598155	1.77485	1.91606	1.82215	2.96676	2.69	1.94461	1.86008	1.68416	1.77896	1.32549	1.78963	2.17202	0.9854	0.992578	2.41127	1.63902
LOC100288079	chr1:185292978-185304171	0	0	0	0	0	0	0	0	0	0	0	0	0	0	0	0
IVNS1ABP	chr1:185265521-185286461	5.90245	10.4258	3.97624	8.90015	6.81969	7.22505	11.5008	8.31597	6.49903	5.12738	6.36635	5.56391	4.51112	2.97072	6.76248	7.20731
PTGS2	chr1:186640943-186649559	0.0311779	0.0225049	0.0102169	0.0146125	0	0.0137158	0.0367106	0.0219313	0	0.106272	0	0.0112119	0.190453	0.161803	0	0.0114563
PLA2G4A	chr1:186798031-186958113	0.321072	1.02637	0.831174	0.577783	1.02858	1.28149	1.11062	0.966066	0.900693	0.514194	0.551386	0.395076	0.360199	0.225757	0.680929	1.16424
FAM5C	chr1:190066796-190446759	1.23899	0.0883709	0.111655	0.717091	0.407903	0.122117	0.201189	0.228392	0.182735	0.103117	1.10582	1.67509	0.0200623	0	0.0362945	0.318348
LOC440704	chr1:190594019-190770788	0	0	0	0	0	0	0	0	0	0	0	0	0	0	0	0
RGS18	chr1:192127591-192154945	0	0	0	0	0	0	0	0	0	0.0437061	0	0	0.0559427	0	0	0
RGS21	chr1:192286121-192336414	0	0	0	0	0	0	0	0	0	0	0	0	0	0	0	0
RGS1	chr1:192544856-192549159	0	0.256245	0	0.303779	0	0	0.0617032	0.0557394	0.0573529	13.8951	0.0589275	0	10.1229	9.80131	0.105078	0
RGS13	chr1:192605267-192629440	0	0	0	0	0	0	0	0	0	0.0323453	0	0	0	0.0321328	0	0
RGS2	chr1:192778168-192781407	0.27142	0.490902	0.0768	1.16304	0.0594551	0.139806	0.607703	0.215346	0.0554175	2.4056	0.228406	0.142001	1.39827	1.30648	0.505858	0.171014
TRMT1L	chr1:185087217-185126230	0.403032	0.798109	0.408776	1.00282	0.427051	0.619576	0.768188	0.593179	0.502914	0.646853	0.368412	0.486175	0.403371	0.364432	0.596135	0.438294
SWT1	chr1:185126191-185260913	0.548609	0.187105	0.515511	0.845809	1.23599	0.409697	0.718278	0.990809	0.796264	0.195654	0.591168	0.587017	0.265872	0.182243	0.228458	0.519956
GLRX2	chr1:193065599-193075244	1.3377	2.48938	1.45831	1.74116	1.74921	2.56651	1.51256	1.80418	1.09721	2.2348	1.7471	1.11998	2.94636	1.39364	1.66625	1.33257
CACNA1E	chr1:181452685-181775921	0.018954	0	0	0	0.00326124	0	0	0	0	0	0	0	0.0148899	0	0	0
KCNT2	chr1:196194912-196577499	0	0	0	0	0	0	0	0	0	0	0	0	0	0	0	0
MIR4735	chr1:196551542-196551611	0	0	0	0	0	0	0	0	0	0	0	0	0	0	0	0
CFH	chr1:196621007-196716634	0	0	0	0.0127996	0	0	0	0.0240157	0.0949135	0	0	0	0	0	0	0.0254833
CFHR3	chr1:196743929-196763203	0	0	0	0	0	0	0	0	0	0	0	0	0	0	0	0
CFHR1	chr1:196788860-196801319	0	0	0	0	0	0	0	0	0	0	0	0	0	0	0	0
CFHR4	chr1:196857143-196887843	0	0	0	0	0	0	0	0	0	0	0	0	0	0	0	0
CFHR2	chr1:196912933-196928356	0	0	0	0	0	0	0	0	0	0	0	0	0	0	0	0
CFHR5	chr1:196946666-196978803	0	0	0	0	0	0	0	0	0	0	0	0	0	0	0	0
F13B	chr1:197008320-197036397	0	0	0	0	0	0	0	0	0	0	0	0	0	0	0	0
ASPM	chr1:197053256-197115824	0	0.0271605	0	0.092708	0	0.00461817	0	0	0	0.00735491	0	0	0.0261728	0	0.0341983	0.00717925
CDC73	chr1:193091087-193223942	0.702659	1.13441	0.576969	1.33973	0.996677	1.11964	1.23879	0.697174	0.459443	1.62548	0.851663	0.676411	1.53165	0.92223	1.09262	0.824937
MIR1278	chr1:193105632-193105713	0	0	0	0	0	0	0	0	0	0	0	0	0	0	0	0
B3GALT2	chr1:193147859-193155743	0	0	0	0	0	0	0	0	0	0	0	0	0	0	0	0
CRB1	chr1:197237333-197447585	0	0	0.00865748	0	0	0	0	0	0.00919708	0	0.010023	0	0	0	0	0.0389312
ZBTB41	chr1:197122813-197169672	0.311304	0.686511	0.266396	0.716097	0.391766	0.250701	0.505414	0.403651	0.297245	0.1722	0.216537	0.329962	0.165838	0.115081	0.448935	0.314361
C1orf53	chr1:197871681-197876497	0.227384	0.5854	0.211007	0.633189	0.367517	0.33359	1.10762	0.227867	0.160287	0	0.42455	0.248219	0.296204	0	0.431756	0.0821131
LHX9	chr1:197881634-197899273	0	0	0	0	0	0	0	0	0	0	0	0	0	0	0	0
NEK7	chr1:198126107-198291548	3.18968	2.43634	2.89881	2.34453	3.57201	4.21112	3.34474	3.03413	2.6226	1.98537	3.00557	2.62896	1.87116	1.30173	3.34902	2.72014
ATP6V1G3	chr1:198492351-198510075	0	0	0	0	0	0	0	0	0	0	0	0	0	0	0	0
PTPRC	chr1:198608136-198726545	0	0.249894	0.00781656	0.261038	0.00904946	0	0.0674513	0.0575733	0.00853129	8.1118	0.0635024	0.00862104	6.90903	6.54589	0.0954637	0
MIR181B1	chr1:198828001-198828111	0	0	0	0	0	0	0	0	0	0	0	0	0	0	0	0
MIR181A1	chr1:198828172-198828282	0	0	0	0	0	0	0	0	0	0	0	0	0	0	0	0
NR5A2	chr1:199996769-200146550	0	0	0	0	0	0	0	0	0	0	0	0	0	0	0	0
FAM58BP	chr1:200182655-200183643	0	0	0	0	0	0	0	0	0	0	0	0	0	0	0	0
ZNF281	chr1:200375419-200379166	0.0873287	0.243159	0.0776915	0.257043	0.0932786	0.253394	0.159258	0.0963855	0.132378	0.629952	0.152355	0.110749	1.03512	0.875818	0.15685	0.162492
KIF14	chr1:200520624-200589862	0	0.0385202	0	0.0363742	0	0	0	0	0	0	0.00564034	0	0	0.00568772	0.0133319	0
DDX59	chr1:200613164-200639126	0.169705	0.598191	0.388928	0.537258	0.219622	0.263779	0.616774	0.363488	0.284705	0.836634	0.42202	0.400109	0.949686	0.714705	0.32276	0.386975
CAMSAP1L1	chr1:200708685-200829831	0.13738	0.16977	0.109778	0.105407	0.138983	0.179904	0.186721	0.180349	0.184145	0.433399	0.10038	0.134181	0.383984	0.468021	0.145262	0.141077
GPR25	chr1:200842165-200843251	0	0	0	0	0	0	0	0	0	0	0	0	0	0	0	0
C1orf106	chr1:200860638-200884864	0	0	0	0	0	0	0	0	0	0	0	0	0.0142438	0	0	0
KIF21B	chr1:200938519-200992828	0	0.00339994	0.00369506	0	0.00489617	0	0.00440102	0.00420073	0	0.157521	0.00891411	0	0.212378	0.183485	0.0359524	0
CACNA1S	chr1:201008639-201081694	0	0	0	0	0	0	0	0	0	0	0	0	0	0	0	0
TMEM9	chr1:201103899-201123632	2.95067	3.20932	1.95703	2.74214	3.15354	2.54829	2.4778	2.21238	1.33237	1.49806	2.61668	3.00277	1.29982	0.821565	1.90126	2.02563
IGFN1	chr1:201159952-201198080	0	0	0	0	0	0	0	0	0	0	0	0	0.00408933	0.00357495	0	0
PKP1	chr1:201252579-201302121	0	0	0	0	0	0	0	0	0	0	0.00826283	0	0.00988802	0	0	0
TNNT2	chr1:201328141-201346805	0	0	0	0	0	0	0	0	0	0	0	0	0	0	0	0.0283376
LAD1	chr1:201349965-201368669	2.69924	3.63126	1.25711	3.504	1.92382	1.72975	1.68174	1.78558	1.21747	0.307583	1.79681	1.44687	0.686291	0.193195	3.53703	1.03298
DENND1B	chr1:197473878-197744623	0.943926	0.962364	0.770632	1.10265	1.16311	1.30605	1.33792	1.3817	1.09515	0.540449	1.03987	1.01615	0.483901	0.374801	1.16377	1.11654
TNNI1	chr1:201372894-201390874	0	0.0116943	0	0.0269839	0	0.019096	0	0	0	0	0.0142712	0	0	0.00743123	0.00762176	0
PHLDA3	chr1:201434621-201438299	0.0942869	1.00173	0.196744	0.668322	0.377146	0.514331	1.70846	0.618256	0.788742	1.80584	0.331929	0.290142	1.54622	1.50615	1.59472	0.131581
RPS10P7	chr1:201489031-201489720	0	0.329206	0.0632167	0.53189	0.157294	0.188632	0.152105	0.267523	0.131446	0.483581	0.220018	0.139353	0.181263	0.455567	0.316934	0.0715215
UCHL5	chr1:192981495-193029237	0.738919	2.04981	0.764537	0.962816	1.05793	1.33773	1.0578	1.09159	1.0491	1.02641	0.846777	0.716152	0.789477	0.722206	1.47977	1.22817
TROVE2	chr1:193028551-193060906	0.194754	0.617921	0.217984	1.04187	0.18815	0.403303	1.01669	0.344498	0.119275	0.772438	0.311112	0.164955	0.765851	0.598667	0.795089	0.388014
CSRP1	chr1:201452657-201476387	4.71504	10.5951	3.59466	8.23171	5.90215	5.92295	11.2097	6.78403	6.16067	5.43572	5.76287	5.31989	6.74517	4.01816	14.031	4.35639
SHISA4	chr1:201857796-201861715	0.733622	0.469914	0.142054	0.360135	0.382894	0.49756	0.231404	0.521184	0.171759	0.287486	0.301401	0.448024	0.192806	0.0375691	0.309326	0.557348
LMOD1	chr1:201865583-201915716	0	0	0	0	0	0.0122647	0	0	0	0	0	0	0.0109394	0	0	0
TIMM17A	chr1:201924618-201939789	1.27838	4.25148	1.27837	2.82788	1.559	1.34206	2.27719	1.69314	1.17654	2.42566	1.35974	1.27611	2.36414	1.16138	2.60967	1.76213
RNPEP	chr1:201951765-201975275	5.45537	7.20872	5.18974	7.09314	7.23101	8.42236	6.40692	7.06042	6.28891	6.21942	7.42368	7.57947	6.37789	4.04078	4.97185	6.67932
ELF3	chr1:201979689-201986315	0.971978	0.931175	0.693126	1.14951	0.838235	1.48281	0.508943	1.42649	0.877054	0.110885	0.804423	0.668173	0.508522	0.014412	0.382528	0.47877
GPR37L1	chr1:202092028-202098634	0	0	0.0182986	0.111128	0	0	0.0225665	0.0204526	0	0	0	0	0	0	0	0
ARL8A	chr1:202101976-202113866	2.2769	1.89752	1.42607	1.95407	2.02332	2.37536	1.74991	1.97192	1.49052	5.06499	2.01839	2.15878	5.04343	4.73868	1.41055	1.63238
PTPN7	chr1:202116140-202130716	0	0.070856	0	0	0.0153211	0	0.014173	0	0	0.835847	0	0	0.940617	0.893097	0	0
PTPRVP	chr1:202137178-202158577	0	0	0	0	0	0	0	0	0	0	0	0	0.0139142	0.0123581	0	0
LGR6	chr1:202163117-202288889	2.91127	3.93636	1.81251	2.68004	2.08588	2.4854	3.13697	1.96997	1.64677	0.954924	3.0536	3.46295	0.688353	0.185152	5.4433	0.414575
UBE2T	chr1:202300784-202311094	0	0.405386	0.0427212	0.362311	0.101196	0.180603	0.153531	0.228994	0.0898662	0.101596	0	0	0	0.048674	0.276428	0.0473099
IPO9	chr1:201798287-201853422	0.224839	0.400611	0.2139	0.442639	0.259208	0.290207	0.362426	0.20603	0.16361	0.385285	0.223341	0.281278	0.573599	0.435729	0.506931	0.249482
SYT2	chr1:202559724-202679551	0	0	0	0	0	0	0	0	0	0.00629106	0	0	0	0	0	0
KDM5B	chr1:202696531-202777549	0.489316	0.760275	0.323365	0.885068	0.412347	0.554511	0.806841	0.546072	0.355102	0.51513	0.550717	0.621111	0.548813	0.457101	1.03791	0.302089
LOC641515	chr1:202794328-202795421	0	0	0	0	0	0	0	0	0	0	0	0	0	0	0	0
LOC148709	chr1:202830881-202844369	0	0	0	0.0255138	0	0	0	0	0	0	0	0	0	0	0	0
RABIF	chr1:202848085-202858263	0.163472	0.394534	0.460246	0.360067	0.19021	0.34373	0.38902	0.283758	0.247618	0.50415	0.345932	0.373347	0.680306	0.46361	0.490724	0.420541
KLHL12	chr1:202860229-202896371	0.556954	0.854988	0.817506	0.89362	0.774554	1.22053	0.865535	0.895077	0.861566	1.07235	0.822214	0.752223	1.41996	1.12414	0.41872	0.778427
ADIPOR1	chr1:202909960-202927700	8.29707	6.86056	6.7317	7.26931	8.25041	9.73635	7.76002	6.83757	6.25806	9.46775	8.8605	8.13188	8.35426	6.5178	6.57972	9.72988
CYB5R1	chr1:202931000-202936404	2.58724	1.39444	2.52359	1.61462	2.30909	2.38101	1.23136	2.32	2.55901	2.1041	2.18612	2.31686	3.00345	2.02575	0.539227	2.81642
LOC401980	chr1:202955579-202976393	0	0	0.0215827	0	0	0	0	0	0	0	0	0	0	0	0	0
TMEM183A	chr1:202976533-202993197	1.1387	0.962237	0.469105	0.577384	1.00507	1.31945	0.969098	0.574212	1.08742	0.345528	1.03962	1.12958	0.614537	0.755433	0.630916	0.0926933
TMEM183B	chr1:202976535-202992668	3.08775	6.23908	2.91448	4.99089	3.03584	2.83752	4.99304	2.93164	2.10728	2.89333	3.56404	3.28356	3.10182	1.2586	5.62515	3.50984
HMCN1	chr1:185703682-186160085	0.0345417	0.0737721	0.067954	0.0947936	0.0432455	0.107532	0.194956	0.161294	0.134537	0.0245041	0.0687395	0.0680123	0.0115048	0	0.151763	0.1856
MIR548F1	chr1:186029866-186446655	0	0	0	0	0	0	0	0	0	0	0	0	0	0	0	0
PRG4	chr1:186265404-186283688	0	1.10915e-12	0	0	6.77879e-12	9.90063e-14	0	0	0	2.12847e-11	0	0	0.0109974	7.19768e-13	4.50598e-13	0
TPR	chr1:186280785-186344457	0.118428	0.15957	0.123336	0.127346	0.146728	0.15769	0.133595	0.156606	0.12971	0.597681	0.112739	0.114802	0.608283	0.478098	0.236145	0.161326
C1orf27	chr1:186344889-186390503	0.644632	0.656442	0.785778	0.790067	0.603223	0.730055	0.74925	0.56925	0.506711	0.612155	0.674561	0.626009	0.40245	0.329469	0.404917	0.592431
OCLM	chr1:186369703-186370587	0	0	0	0	0	0	0	0	0	0.0728081	0	0	0.186626	0	0	0
PDC	chr1:186412697-186430239	0	0	0	0	0	0	0	0	0	0	0	0	0	0	0	0
PPFIA4	chr1:203020310-203047864	0	0	0.00741835	0	0	0	0	0	0	0.0592734	0	0	0.0423844	0.0184524	0	0
MYOG	chr1:203052256-203055377	0	0	0	0	0	0	0	0	0	0	0	0	0	0	0	0
MYBPH	chr1:203136938-203144942	0	0.0181236	0	0	0	0	0.0233795	0	0	0	0	0	0.0822023	0.0729889	0	0
CHI3L1	chr1:203148058-203155922	7.98693	1.96281	2.07158	2.95137	5.8103	3.31512	1.11423	3.43349	2.41291	2.99069	1.85555	1.66831	17.411	14.9186	0.590756	0.672515
CHIT1	chr1:203185206-203198860	0	0.488794	0.015826	0.167873	0.0815019	0	0.209304	0.0530745	0	32.9364	0.112253	0	8.47141	8.9325	0.0990672	0.0186669
LOC730227	chr1:203267885-203274453	0.0258343	0.0685676	0	0	0.0202813	0	0	0	0	0.0813839	0	0	0	0	0.0215701	0
ADORA1	chr1:203096835-203136533	3.10379	1.41785	2.43198	0.962058	1.35727	3.49596	0.693632	2.12127	2.07852	0.414348	3.12894	2.553	0.185321	0.0804812	1.44906	1.93374
FMOD	chr1:203309751-203320289	0	0	0	0	0.0163766	0	0	0.0284299	0	0.0166708	0	0	0	0.0156342	0	0
PRELP	chr1:203444882-203460479	0	0	0	0	0	0	0	0	0	0	0	0	0	0	0	0
OPTC	chr1:203463270-203478077	0	0	0	0	0	0	0	0	0	0.0360832	0	0	0	0	0	0
BTG2	chr1:203274663-203278729	2.74684	1.11588	0.30927	2.4668	0.18181	0.940087	1.91432	0.372366	0.489542	3.13003	0.565176	0.456945	3.02546	2.98025	0.538936	0.670395
LAX1	chr1:203734283-203745480	0	0	0	0	0	0	0	0	0	0.0141581	0	0	0.0876673	0	0	0
NAV1	chr1:201617449-201796102	0.00526697	0.0259824	0.0115627	0.0216043	0	0.00449388	0.0247561	0.014262	0	0.331202	0.00373641	0.00361943	0.38611	0.368235	0.0215996	0
MIR1231	chr1:201777738-201777830	0	0	0	0	0	0	0	0	0	0	0	0	0	0	0	0
ZC3H11A	chr1:203764750-203823256	0.455445	1.09393	0.416351	1.22088	0.586028	0.692592	1.06364	0.613503	0.732434	1.58492	0.499753	0.383506	1.25103	1.14255	1.22891	0.643043
ZBED6	chr1:203766650-203769590	0.042893	0.0735231	0.0692787	0.0789726	0.0986538	0.136137	0.0333228	0.0890539	0.0442245	0.297345	0.0632734	0.0460168	0.317447	0.412555	0.218524	0.109338
NCRNA00303	chr1:204001574-204010392	0	0	0	0	0	0	0	0	0	0	0	0	0	0	0	0
SNRPE	chr1:203830739-203840280	1.26647	2.46481	1.01079	2.18035	1.18059	1.33186	1.32444	1.25655	0.599957	0.92775	0.921148	1.17988	1.47176	0.845431	1.27377	1.01989
ETNK2	chr1:204100189-204121307	0	0	0	0	0	0	0	0	0	0	0	0	0	0	0	0
REN	chr1:204123943-204135465	0	0.0528375	0	0	0	0	0	0	0	0	0.0317347	0	0	0	0	0
KISS1	chr1:204159468-204165619	0	0	0	0	0	0	0	0	0	0	0	0	0	0	0	0
GOLT1A	chr1:204167287-204183220	0.163419	0.0507088	0	0.22406	0	0.155491	0.0619392	0	0.111075	0.128759	0	0	0.142713	0	0.0655315	0
SOX13	chr1:204042245-204096871	0.229923	0.245848	0.0965416	0.176783	0.102339	0.27782	0.230326	0.241551	0.147728	0.385981	0.219313	0.24357	0.665533	0.43074	0.187126	0.182118
LOC127841	chr1:204337557-204338847	0	0	0	0	0	0	0	0	0	0	0	0	0	0	0	0
PPP1R15B	chr1:204372491-204380944	0.524996	0.883959	0.486976	1.31875	0.645452	0.934672	3.33983	0.97857	1.43439	2.12446	0.645696	0.55707	1.96046	2.15678	3.36826	0.821276
PLEKHA6	chr1:204187980-204329044	0.505204	0.325941	0.322492	0.347303	0.471983	0.798144	0.487567	0.505965	0.550853	0.0826752	0.73492	0.54047	0.0659898	0.0321075	0.796616	0.390136
PIK3C2B	chr1:204391757-204459474	0.131212	0.267742	0.135845	0.253538	0.223521	0.346506	0.132011	0.223384	0.233834	0.146083	0.217626	0.233202	0.0975337	0.0912784	0.307127	0.213763
ATP2B4	chr1:203595927-203713209	0.0733853	0.041947	0.0281428	0.0415354	0.022208	0.0488222	0.0389537	0.0454382	0.00491717	0.79879	0.0377417	0.0413693	0.719691	0.938607	0	0.0206499
SNORA77	chr1:203698708-203698833	0	0	0	0	0	0	0	0	0	0	0	0	0	0	0	0
LRRN2	chr1:204586302-204654597	0.155018	0.0119012	0.068338	0.121546	0.10844	0.198111	0.127296	0.203467	0.168416	0.0176751	0	0.0779052	0.0820596	0	0.0982523	0.784276
CNTN2	chr1:205012339-205047171	0	0.0134265	0	0	0	0	0.0226183	0	0	0	0	0.00541653	0	0	0	0
TMEM81	chr1:205052256-205053588	0.140646	0.0308685	0	0.0426013	0	0.0859704	0.0363699	0.0964382	0.0316581	0.0738176	0	0.0336255	0.0427712	0	0	0.0338612
RBBP5	chr1:205055269-205091150	0.431299	1.1946	0.300324	0.946089	0.490537	0.539044	0.726671	0.494151	0.587286	0.547598	0.607012	0.462729	0.608149	0.522851	0.850812	0.543723
DSTYK	chr1:205111630-205180727	0.270285	0.487249	0.307332	0.473549	0.45004	0.462312	0.870375	0.519507	0.416792	0.338385	0.523922	0.403663	0.276704	0.166929	0.958218	0.426413
TMCC2	chr1:205197037-205242471	0	0	0	0.0155535	0	0	0.0246454	0.0113401	0	0	0	0.0116664	0.0143657	0	0.0247174	0
NUAK2	chr1:205271190-205290883	0	0	0	0	0	0	0.0144595	0	0	0.276195	0.014351	0	0.154802	0.25521	0	0.0140004
KLHDC8A	chr1:205305647-205326039	0	0	0	0	0	0	0	0	0	0	0	0	0	0	0	0
LOC284576	chr1:205342379-205356568	0	0	0	0	0	0	0	0	0	0	0	0	0	0	0	0
LEMD1	chr1:205350505-205391214	0	0	0	0	0	0	0	0	0	0	0	0	0	0	0	0
[truncated: 22,659 more rows]
