# Supplementary material for: RNA Sequencing of the Human Milk Fat Layer Transcriptome Reveals Distinct Gene Expression Profiles at Three Stages of Lactation
Source: PLoS One. 2013 Jul 5;8(7):e67531. doi: 10.1371/journal.pone.0067531 (PMC3702532; doi:10.1371/journal.pone.0067531)
Supplement: Dataset S5 — Details on primer probes sets for PCR assay. (XLSX) [file pone.0067531.s010.xlsx]

## Sheet: Description
	This Excel Workbook contains qPCR probe information from Lemay et al (2013) "Transcriptome analysis of human milk production by RNA sequencing reveals distinct gene expression profiles at three stages of lactation"
	Information on all qPCR probe sets used in this project is provided in the "Table" sheet.

## Sheet: Table
Dataset S6: Description of genes, TaqMan assay positions, and accession numbers for qPCR validation
Gene Name	Description	Accession #	ID #	Amplicon Length	Exon Boundary	Assay Location
18S	Eukaryotic 18S rRNA	X03205.1	Hs99999901_s1	187	1 - 1	604
SSH3	slingshot homolog 3 (Drosophila)	NM_017857.3	Hs00215309_m1	72	13 - 14	1860
ACTB	β-Actin	NM_001101.3	Hs01060665_g1	63	2 - 3	208
CSN2	β-Casein	NM_001891.2	Hs00914395_m1	101	5 - 6	689
LALBA	α-Lactalbumin	NM_002289.2	Hs00182028_m1	87	2 - 3	317
CSN3	κ-Casein	NM_005212.2	Hs00757917_m1	100	4 - 5	637
PGM1	phosphoglucomutase 1	NM_001172818.1	Hs00160062_m1	123	6 - 7	1332
		NM_001172819.1		123	6 - 7	1123
		NM_002633.2		123	6 - 7	1246
UGP2	UDP-glucose pyrophosphorylase 2	NM_001001521.1	Hs00198879_m1	74	9 - 10	1667
		NM_006759.3		74	9 - 10	1723
INSR	Insulin receptor	NM_000208.2	Hs00961554_m1	68	21-22	3906
		NM_001079817.1		68	20-21	3870
IRS2	Insulin receptor substrate 2	NM_003749.2	Hs00275843_s1	70	1-1	3991
AKT1	v-akt murine thymoma viral oncogene homolog 1	NM_001014431.1	Hs00178289_m1	66	4-5	627
		NM_001014432.1		66	5-6	711
		NM_005163.2		66	4-5	841
EIF4EBP1	eukaryotic translation initiation factor 4E binding protein 1	NM_004095.3	Hs00607050_m1	69	2-3	395
PTPRF	protein tyrosine phosphatase, receptor type, F	NM_002840.3	Hs00160858_m1	70	16-17	3377
		NM_130440.2		70	15-16	3350
PPP1CB	protein phosphatase 1, catalytic subunit, beta isozyme	NM_002709.2	Hs01027790_m1	101	7-8	1238
		NM_206876.1		101	8-9	1033
PIK3R2	phosphoinositide-3-kinase, regulatory subunit 2 (beta)	NM_005027.2	Hs00178181_m1	75	11-12	1932
FLOT2	flotillin 2	NM_004475.2	Hs00170457_m1	63	2-3	251
